# Supplementary material
Source: PubMed Central journal article supplement (PMC3879630)

# 10-formyltetrahydrofolate dehydrogenase SC662AISNVK

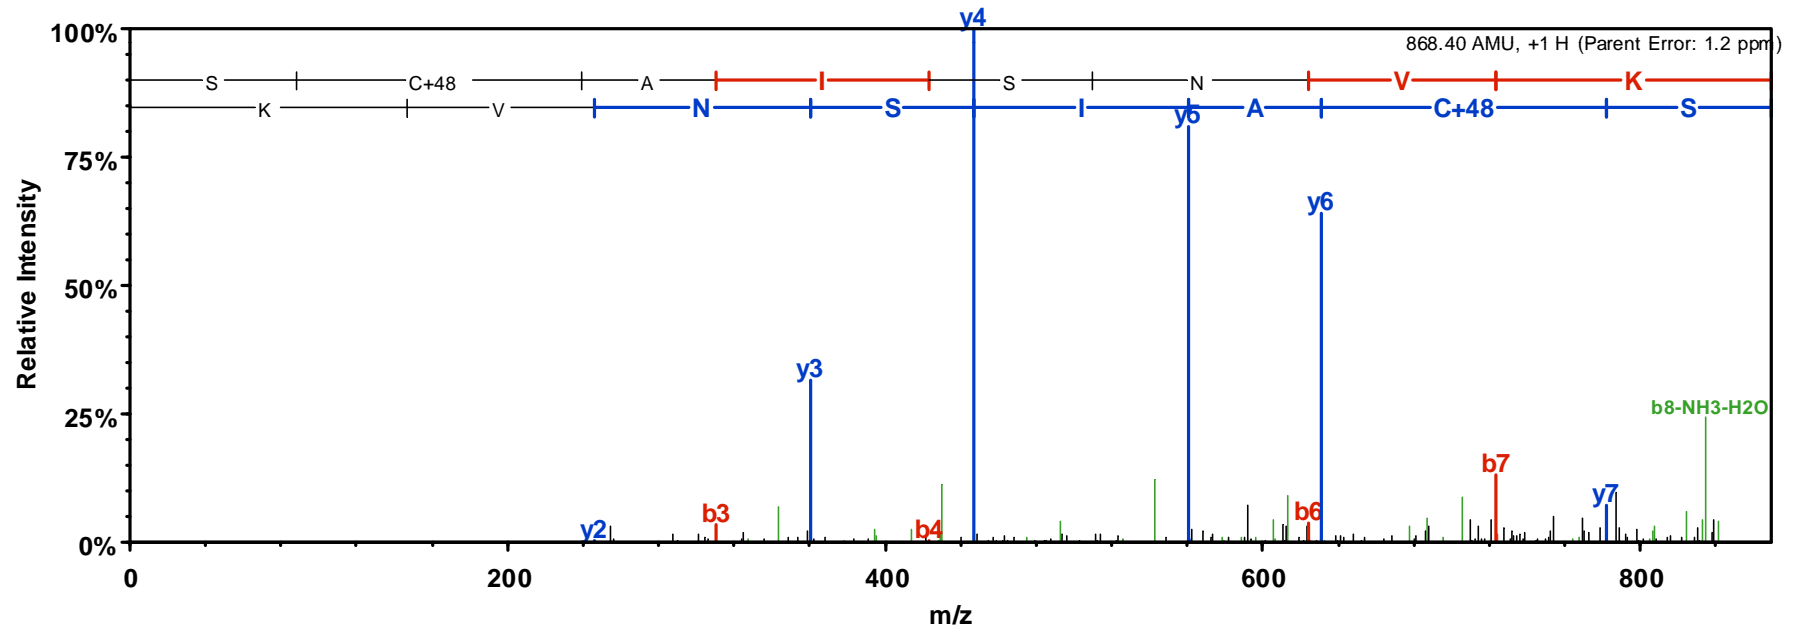

# Aconitate hydratase, mitochondrial C410KSQFTITPGSEQIR

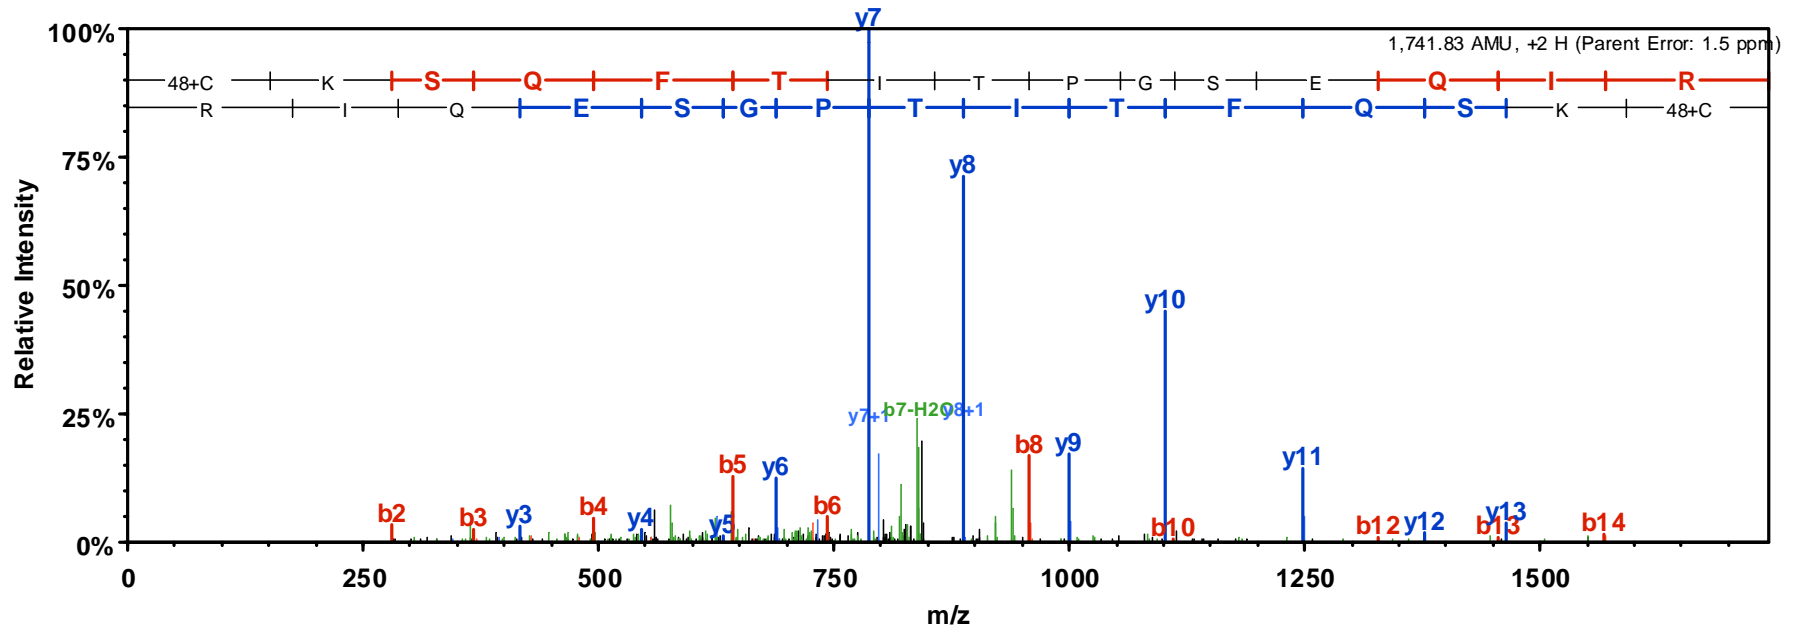

# Actin-related protein 10 C27GFAGETGPR

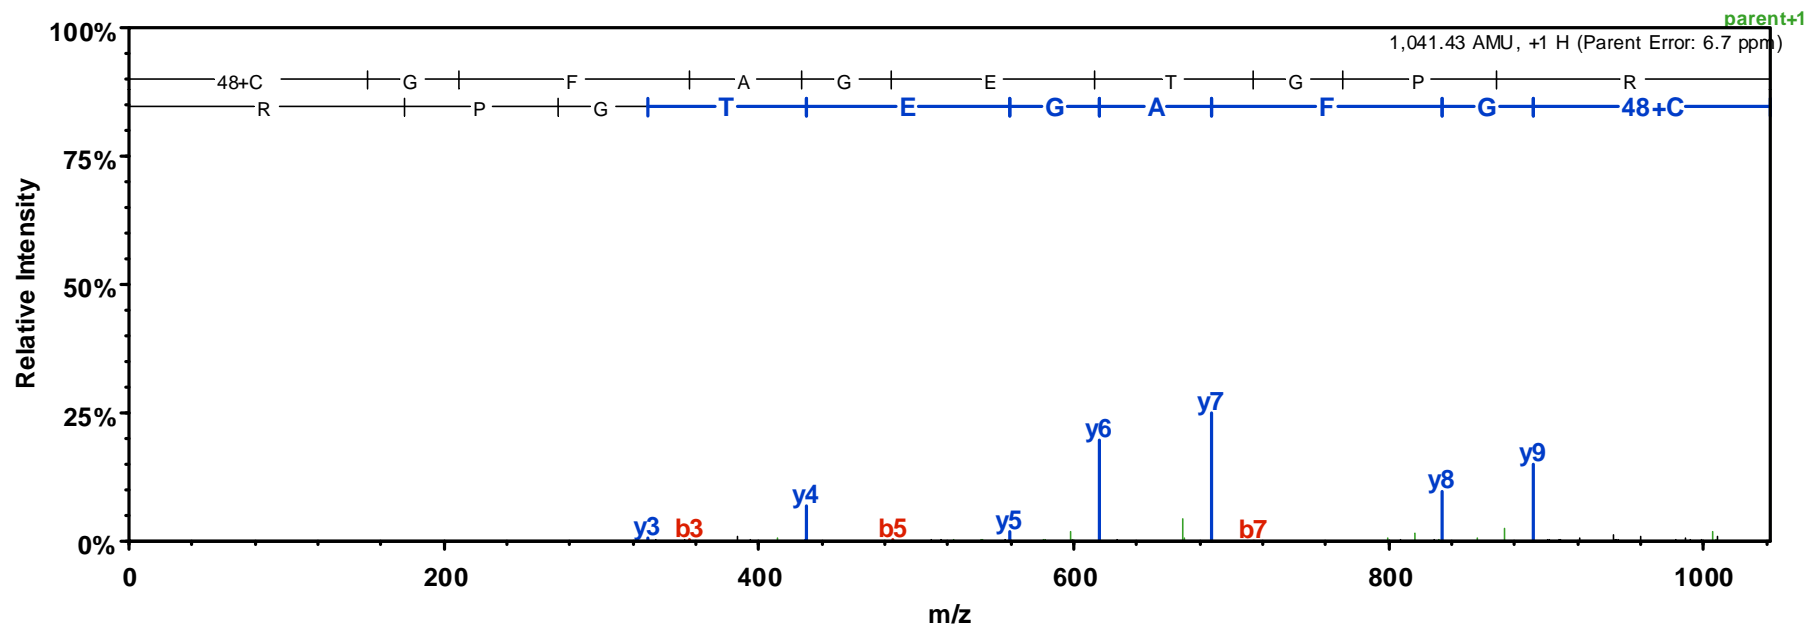

Actin-related protein 10  
VVIIESVLC97PSHFR

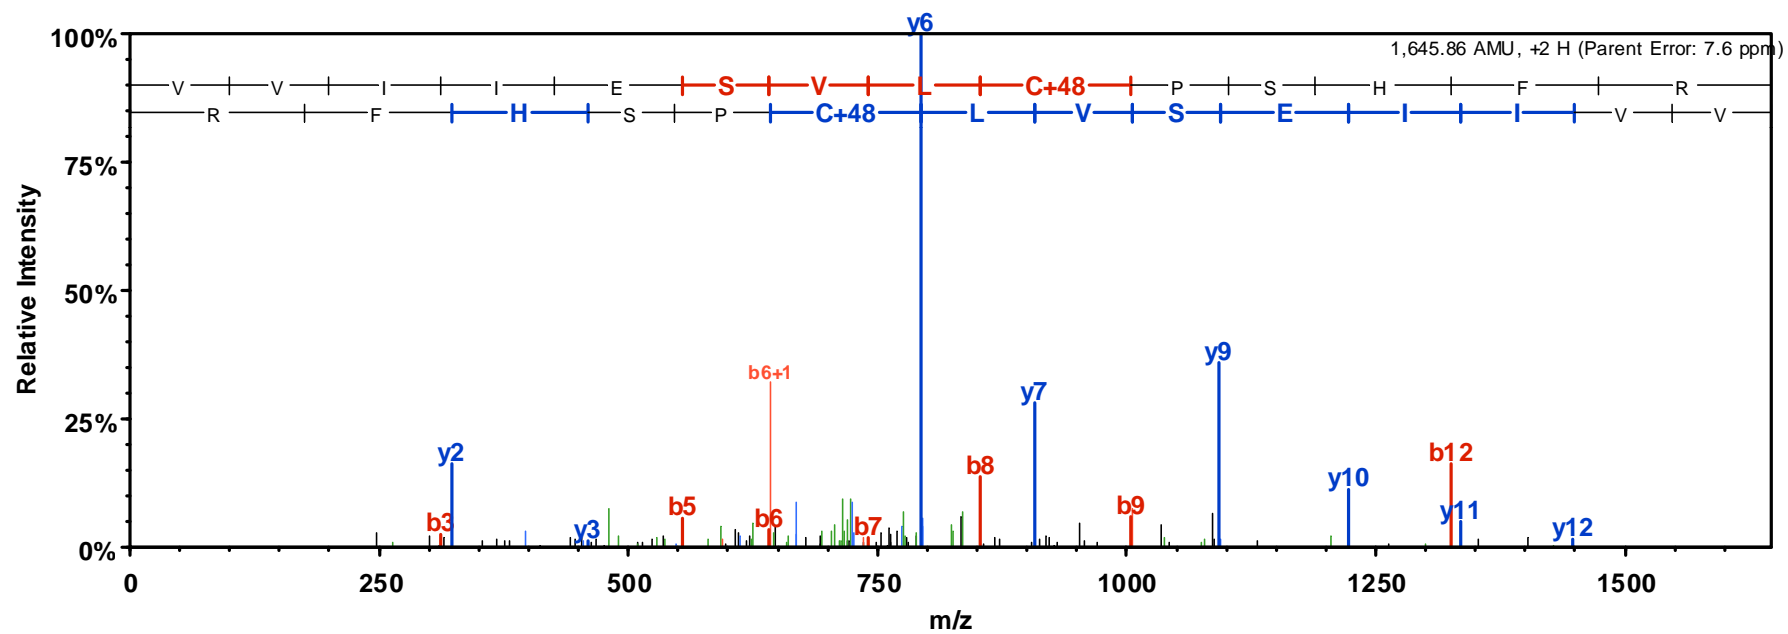

Acyl-CoA dehydrogenase family member 10  
LC109SEMLK

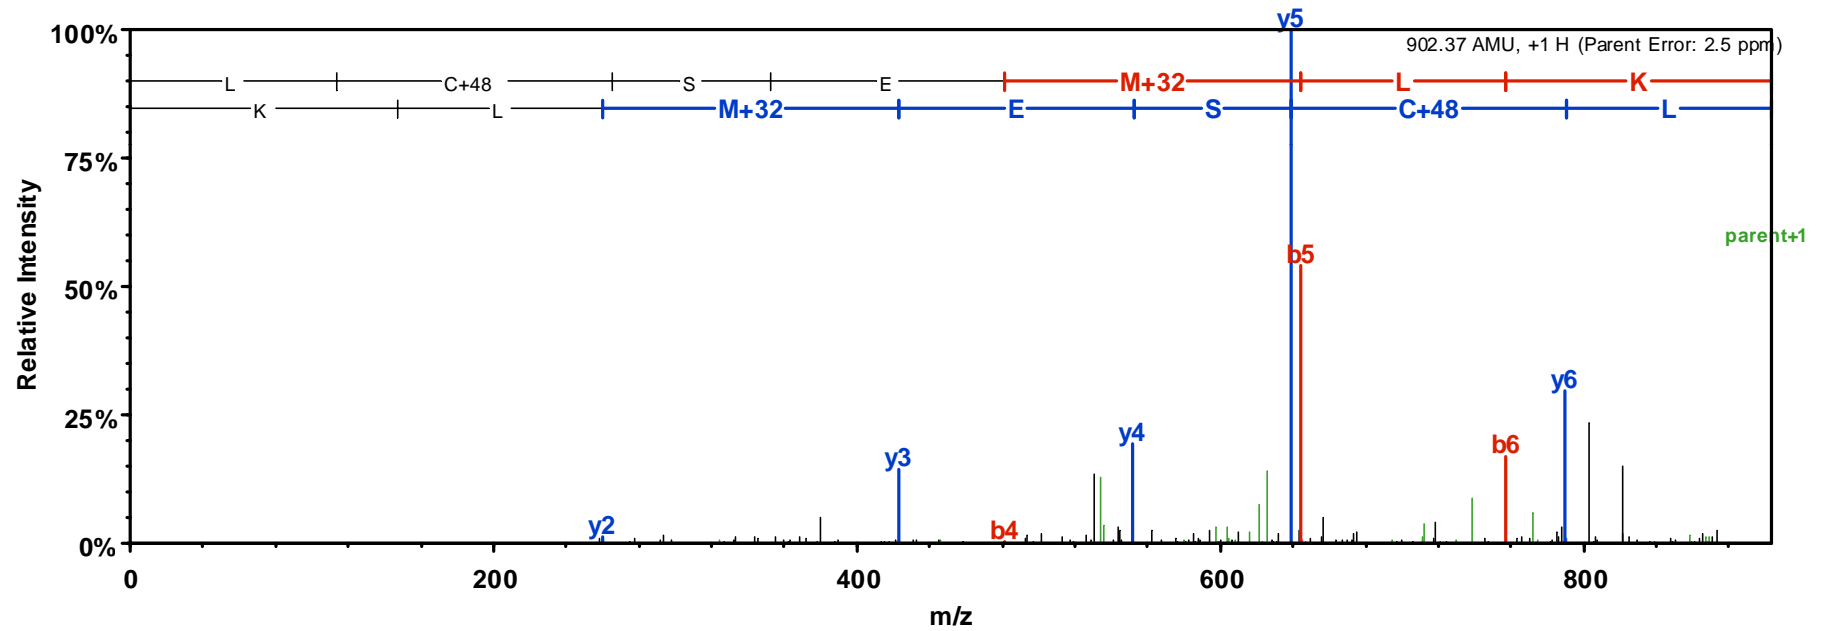

Acyl-CoA dehydrogenase family member 11  
C547KIAIVLGR

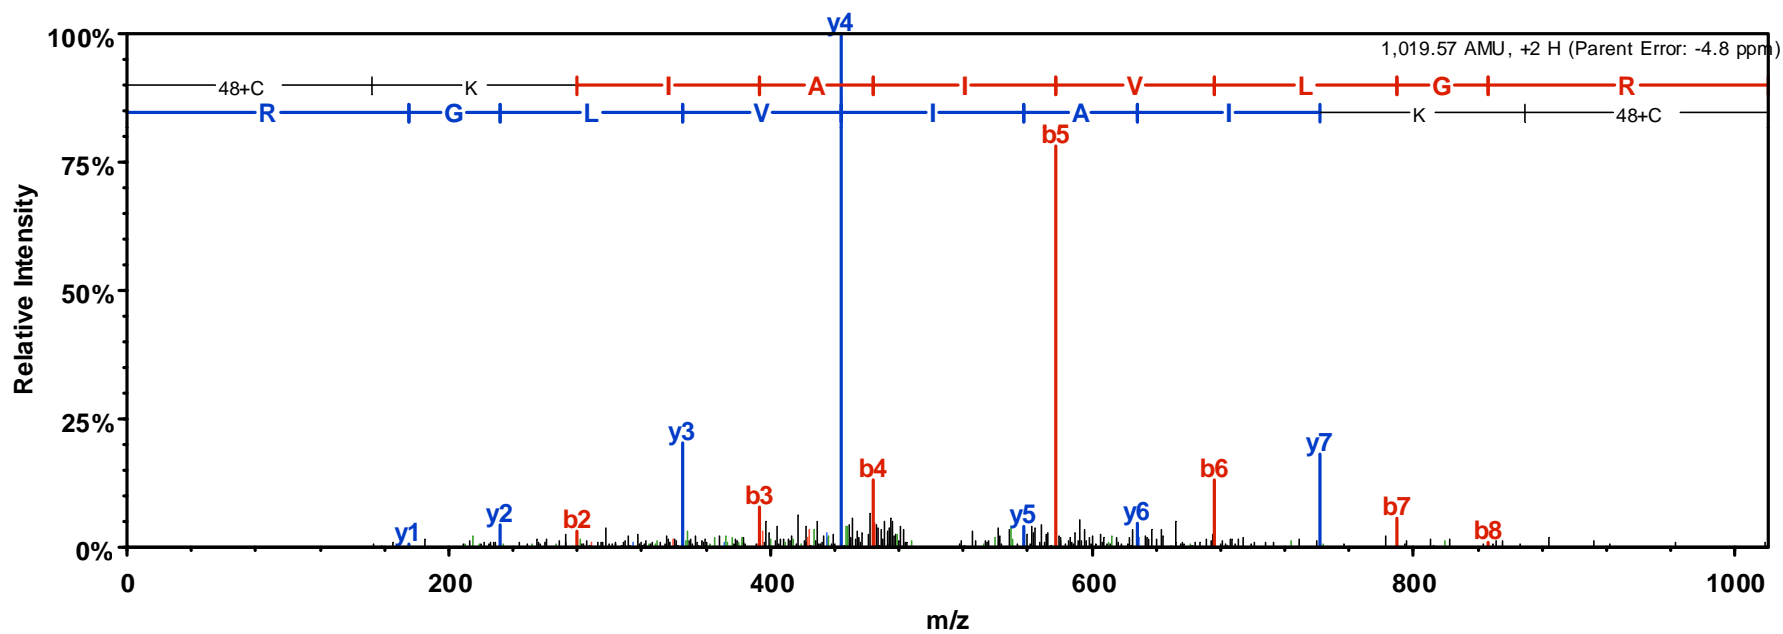

Adenosine kinase  
TGC353TFPEKPDFH

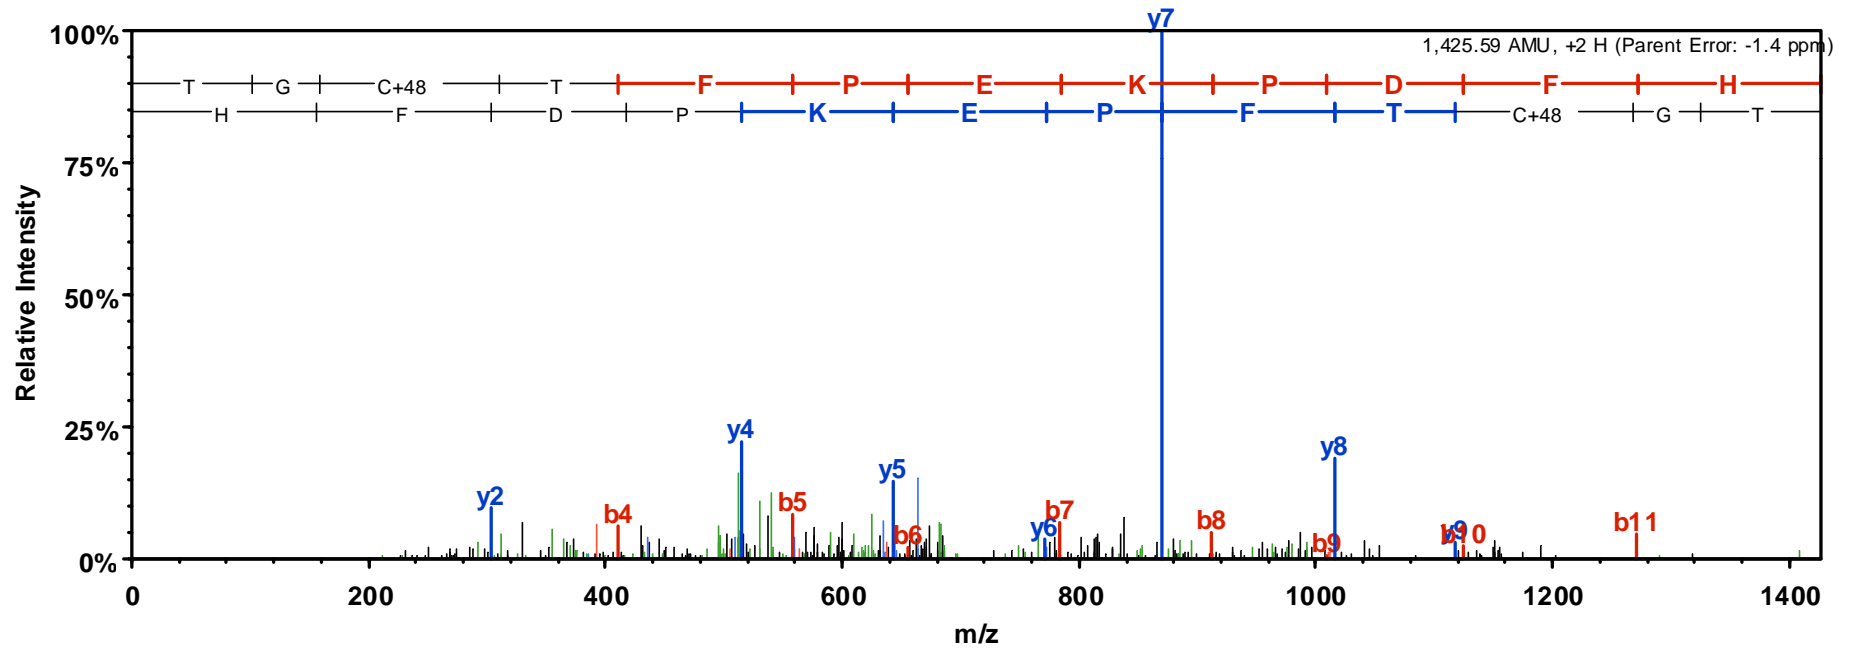

# Adenosylhomocysteinase SKFDNLYGC195R

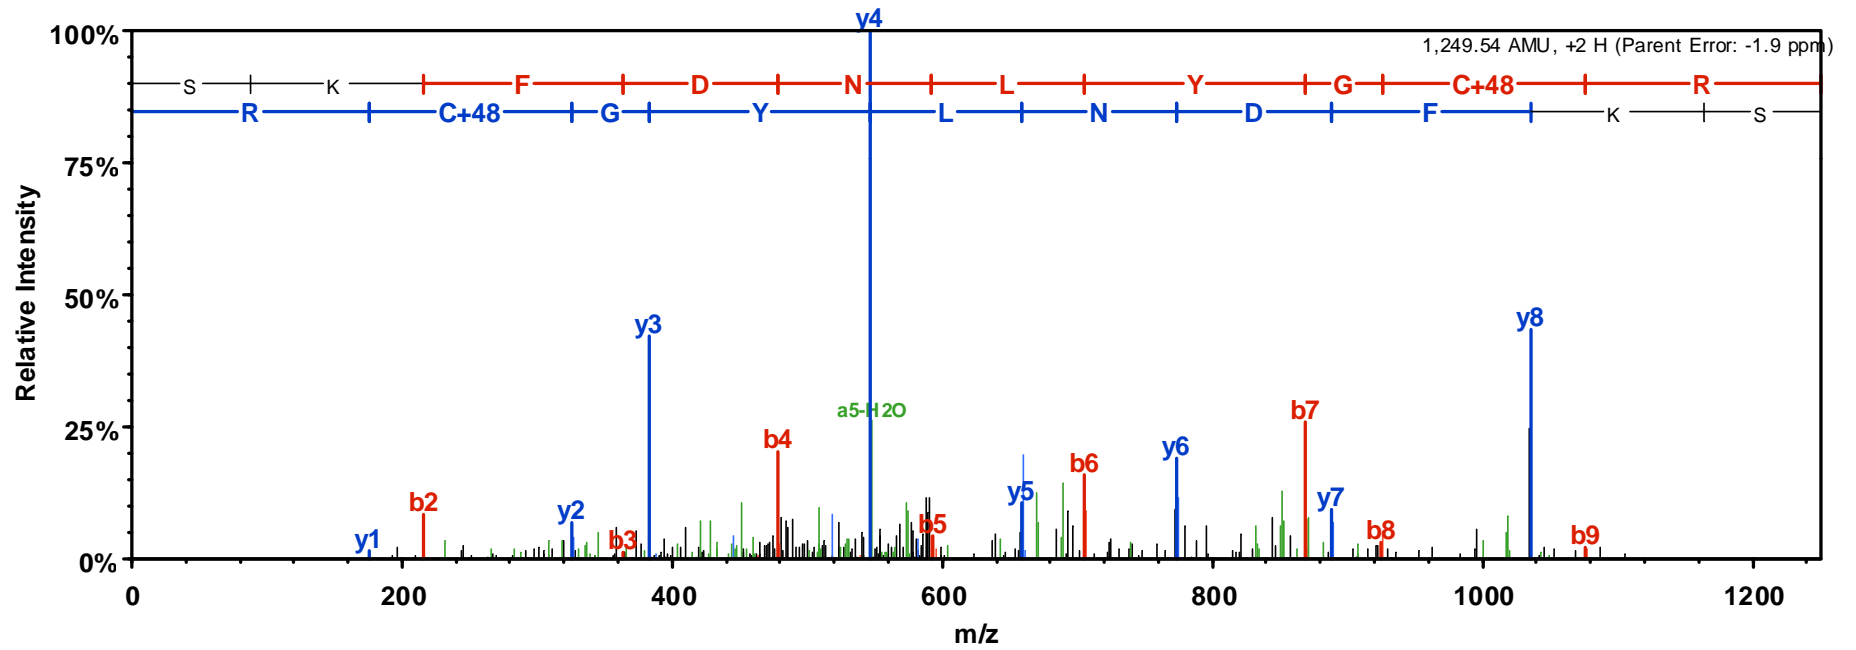



Adenylate kinase 2, mitochondrial  
LAENFC40VC42HLATGDMLR

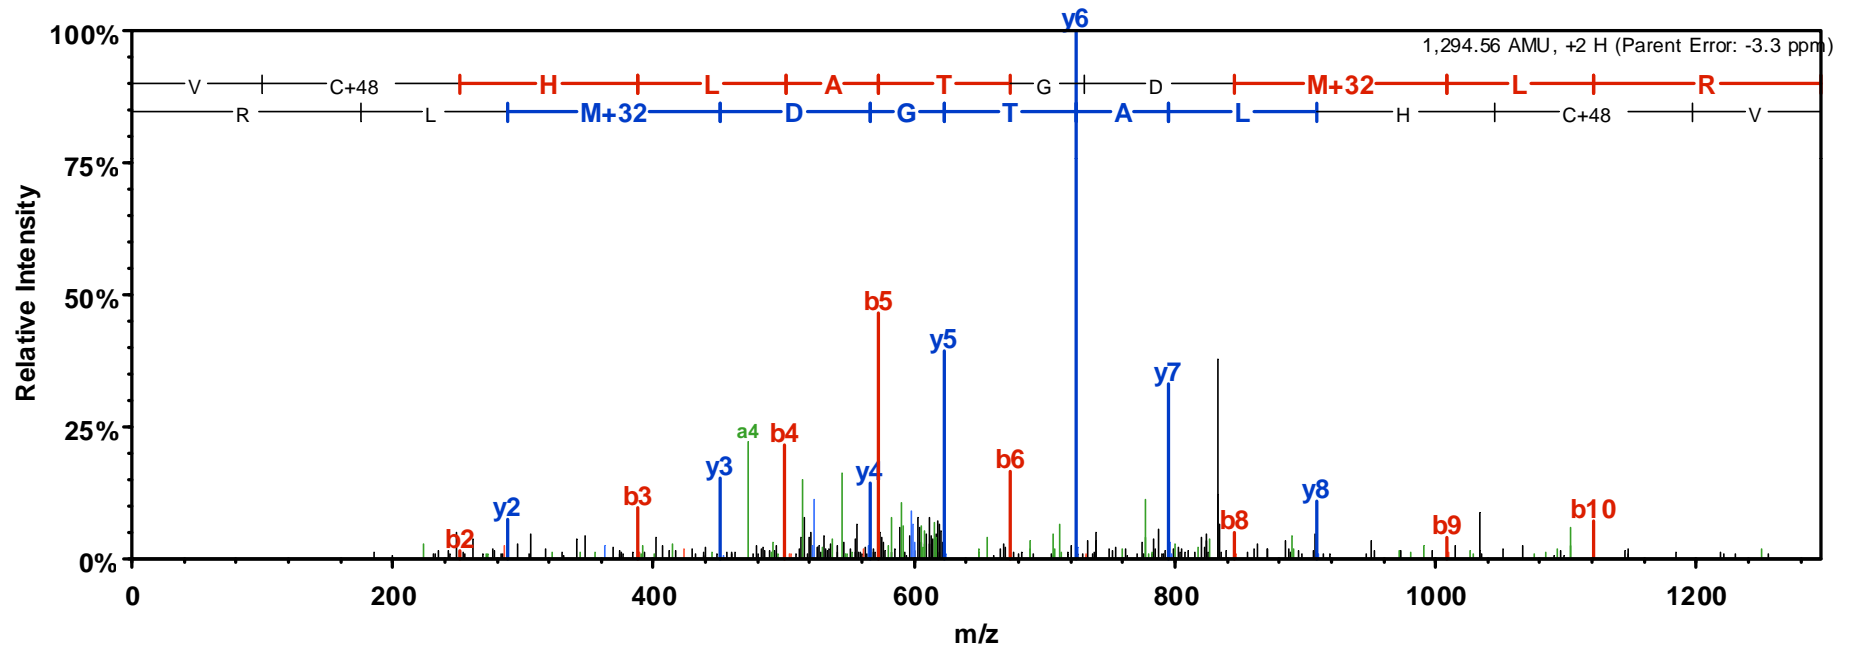

Adenylate kinase 2, mitochondrial  
NLETPLC92KNGFLLDGFPR

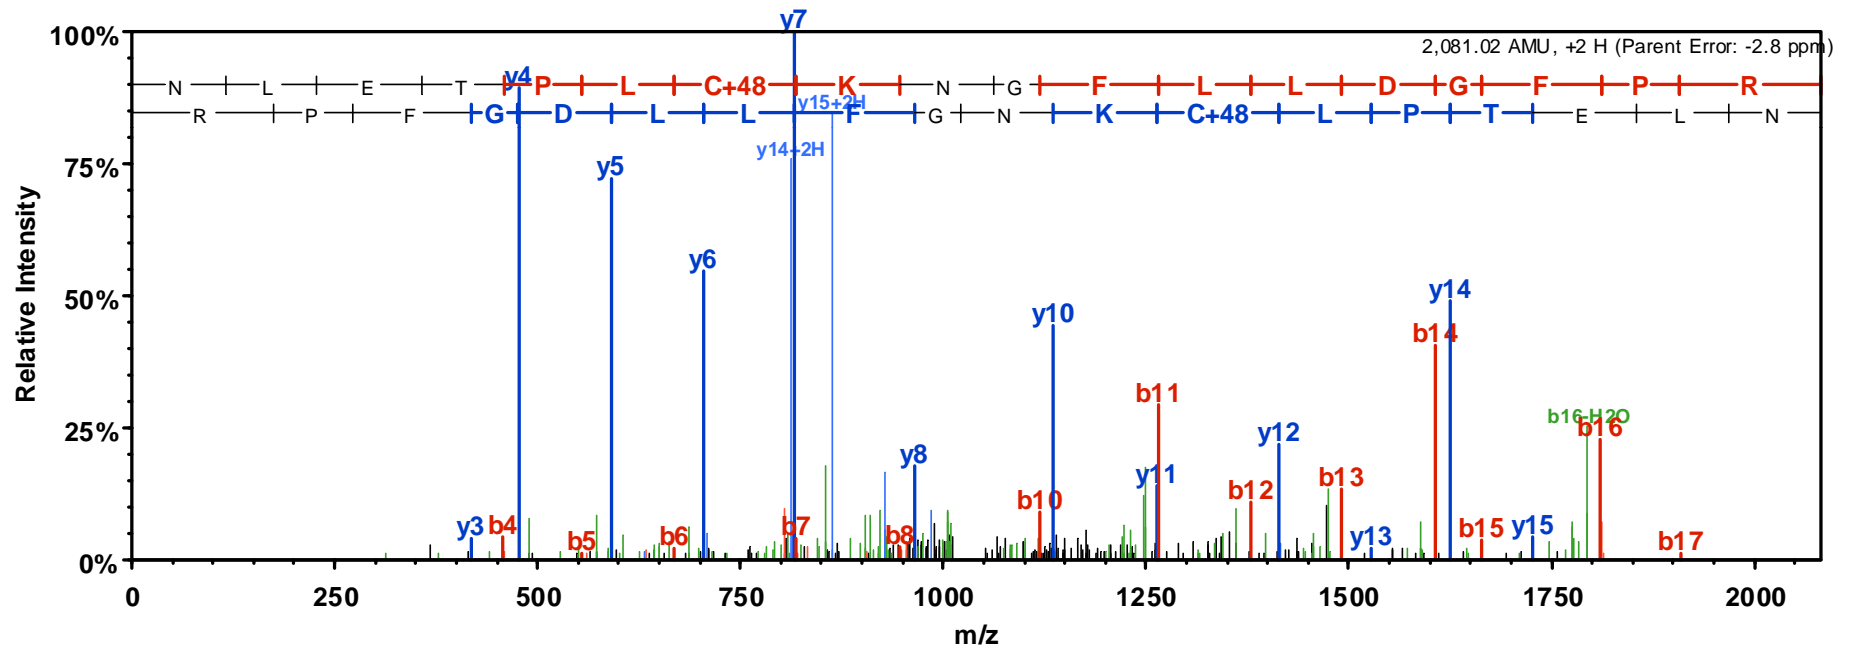

Adenylate kinase 2, mitochondrial  
ATC232KDLVMFI

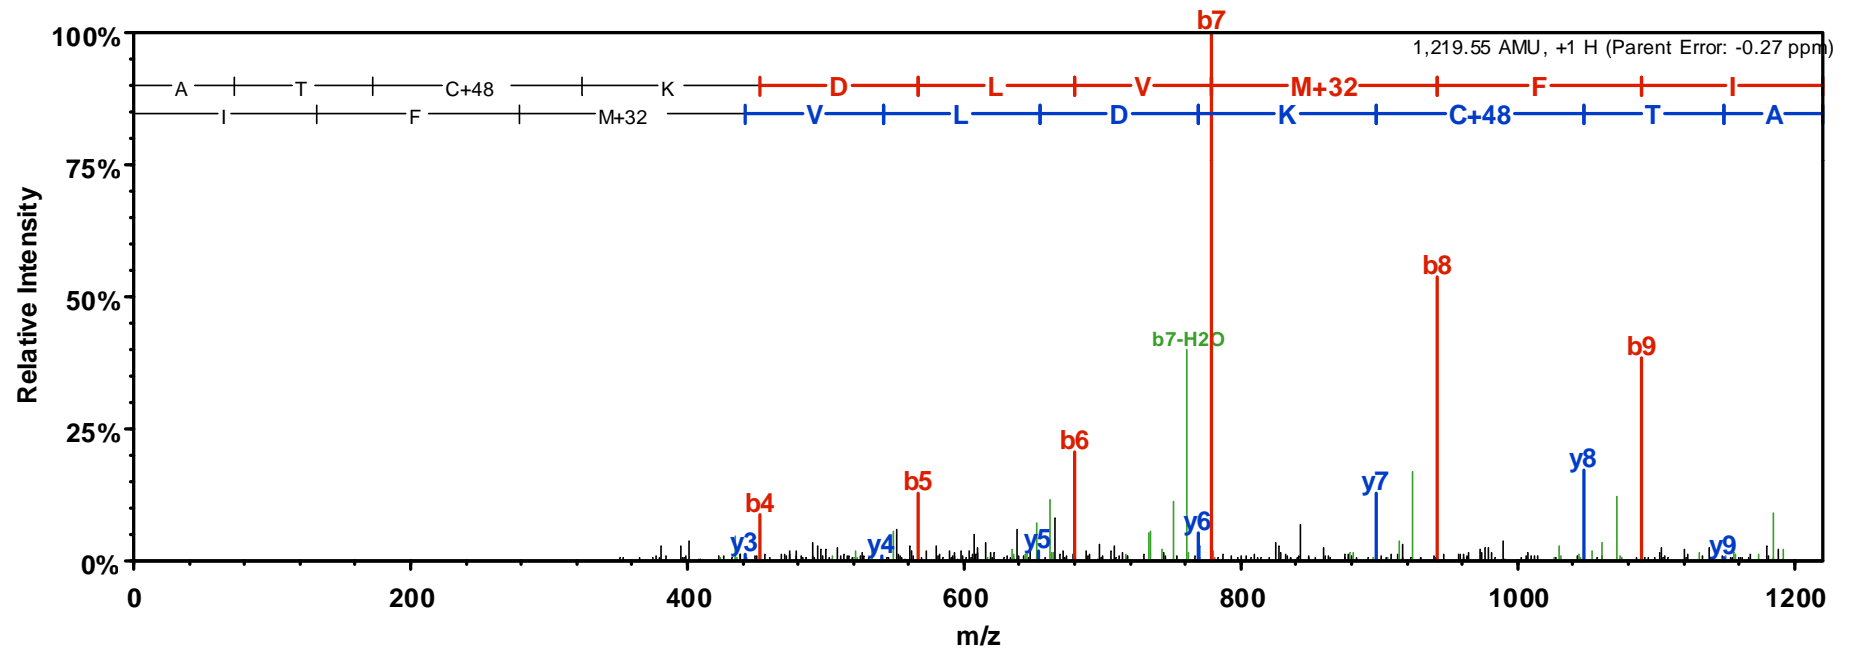

Adenylate kinase isoenzyme 1  
IIFVVGGPGSGKGTQC25EK

# Adenylate kinase isoenzyme 1

## VNAEGSVDSVFSQVC187THLDALK

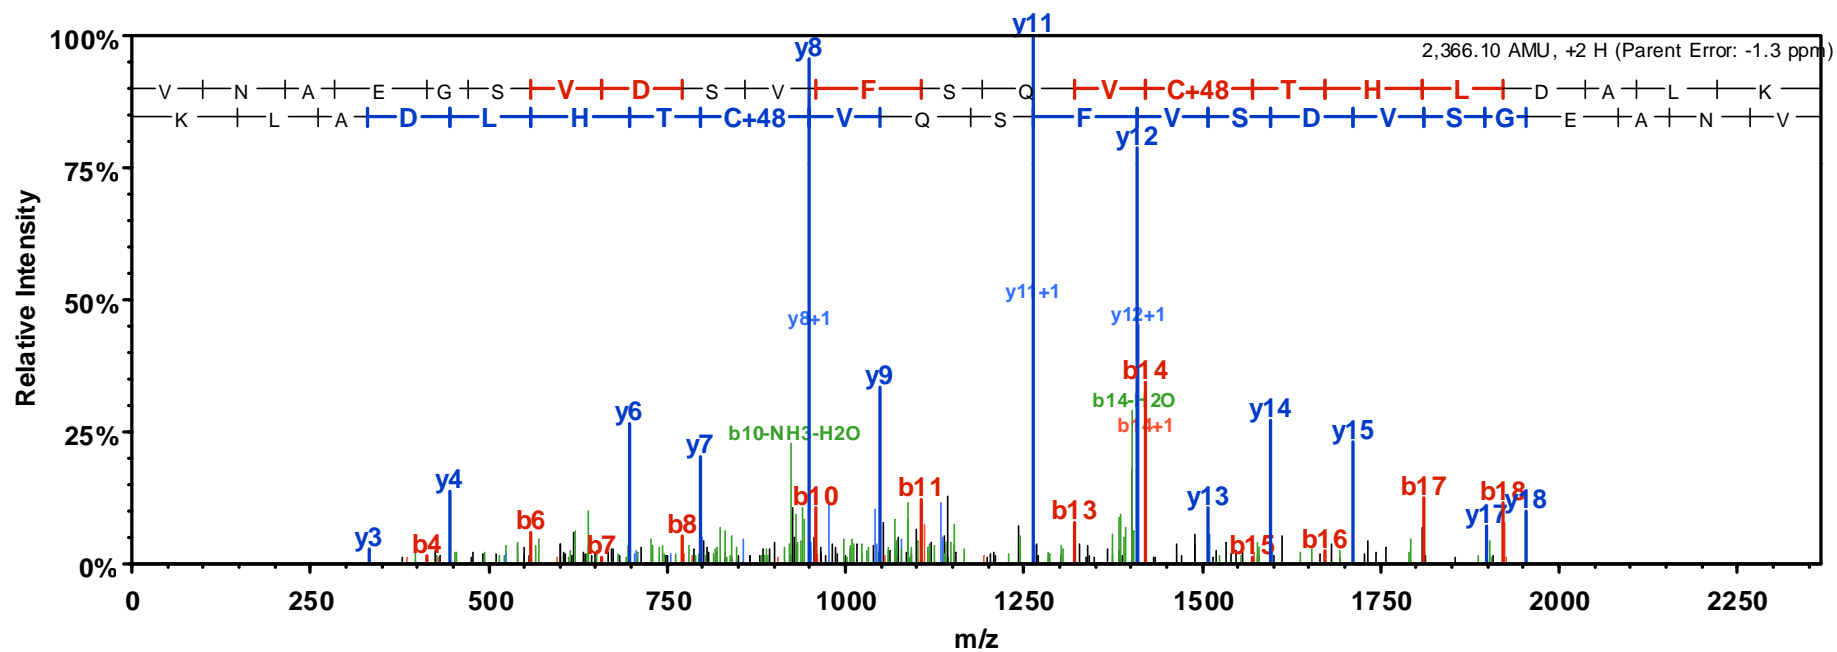

ADP/ATP translocase 2  
GLGDC160LVK

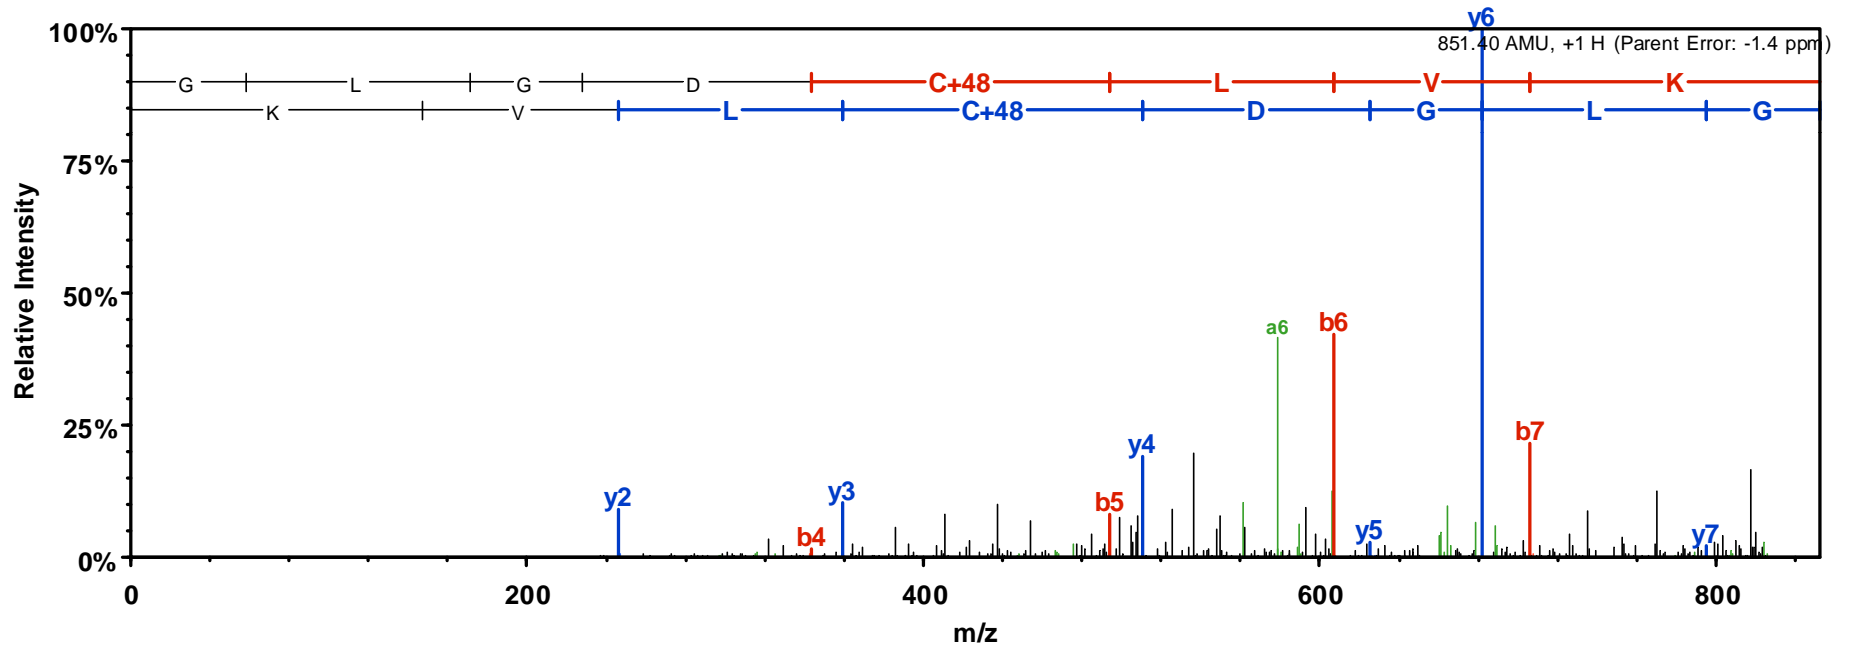

Aldehyde dehydrogenase family 8 member A1  
ITQLSAPHC247K

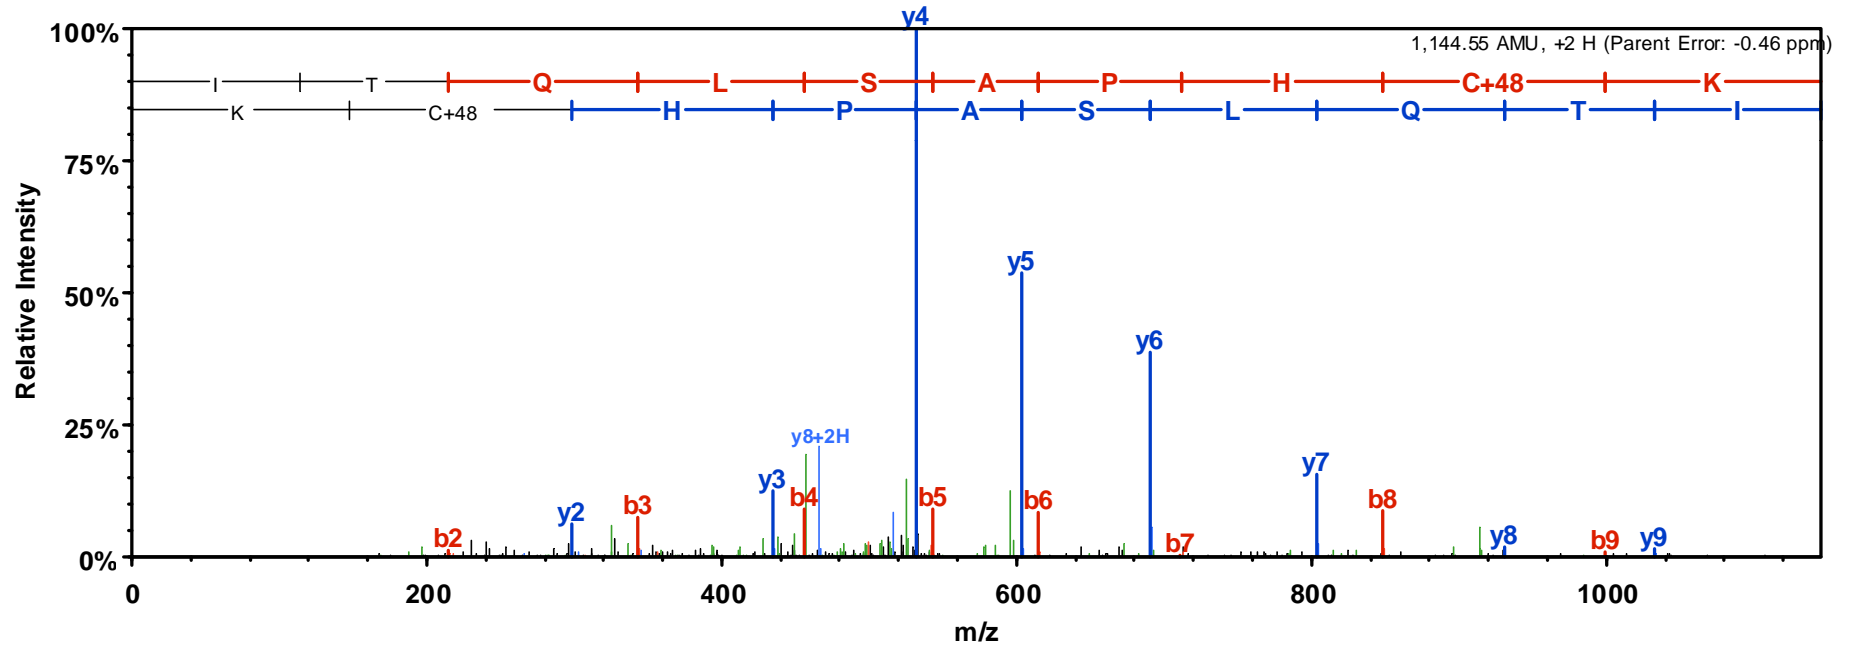

# Ankyrin repeat and KH domain-containing protein 1

## RLTSSVSC181ALDEAAAALTR

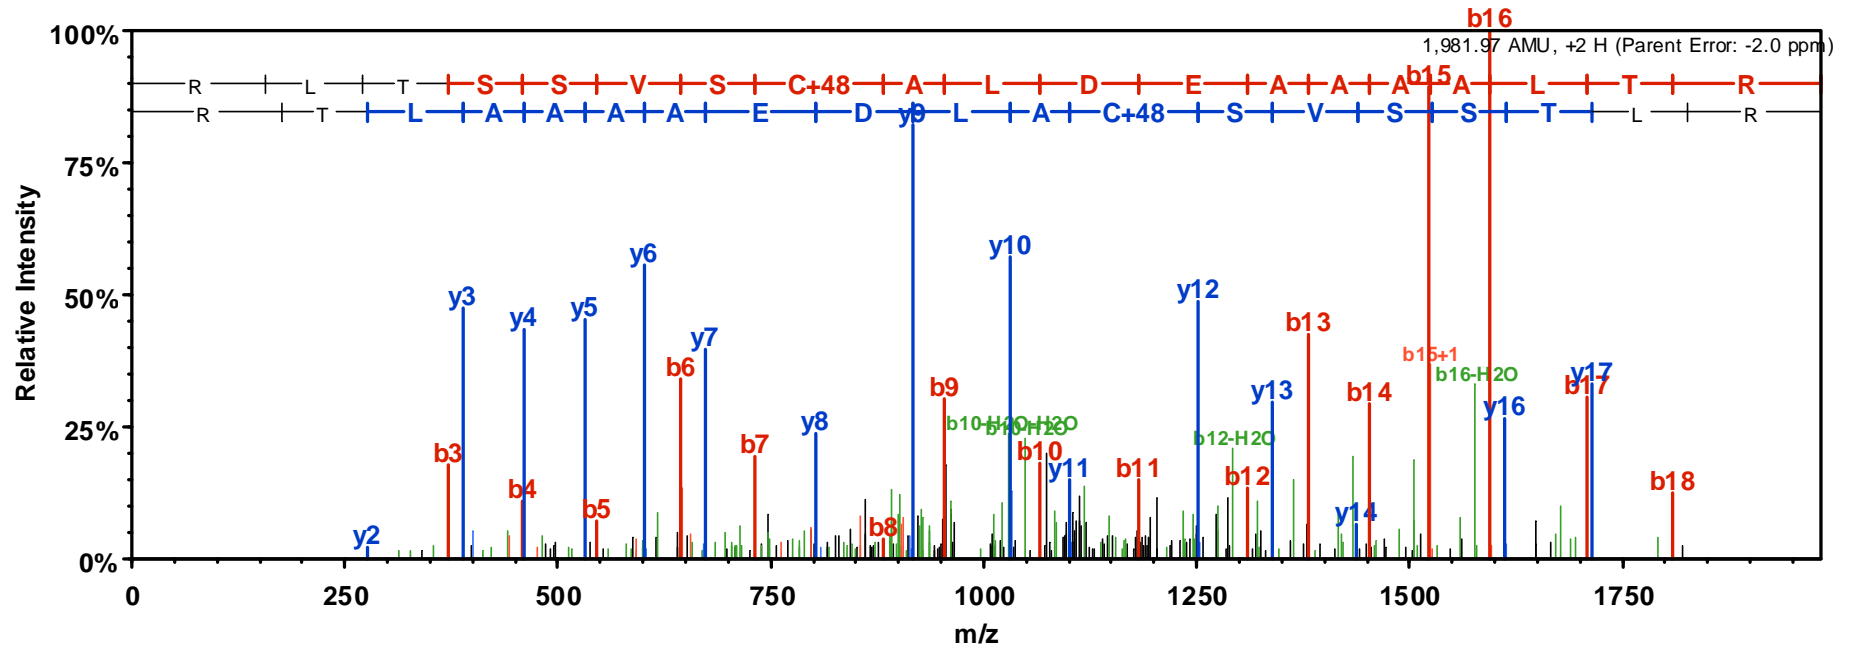



Ankyrin repeat and KH domain-containing protein 1  
SLAEAC213SDGDVNAVSRK

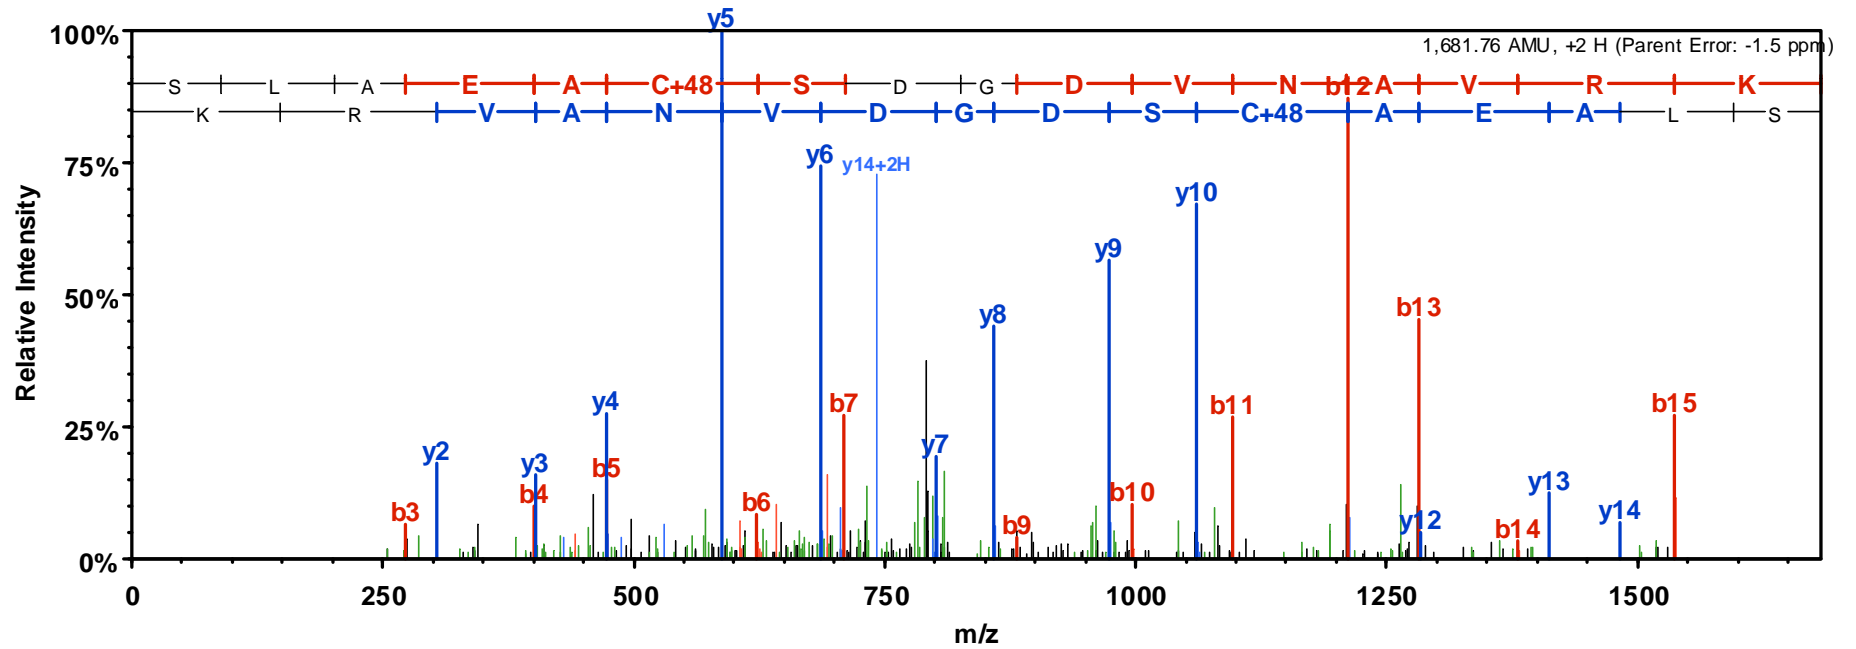

Ankyrin repeat and KH domain-containing protein 1  
AGADIELGC535STPLMEASQEGHLELVK

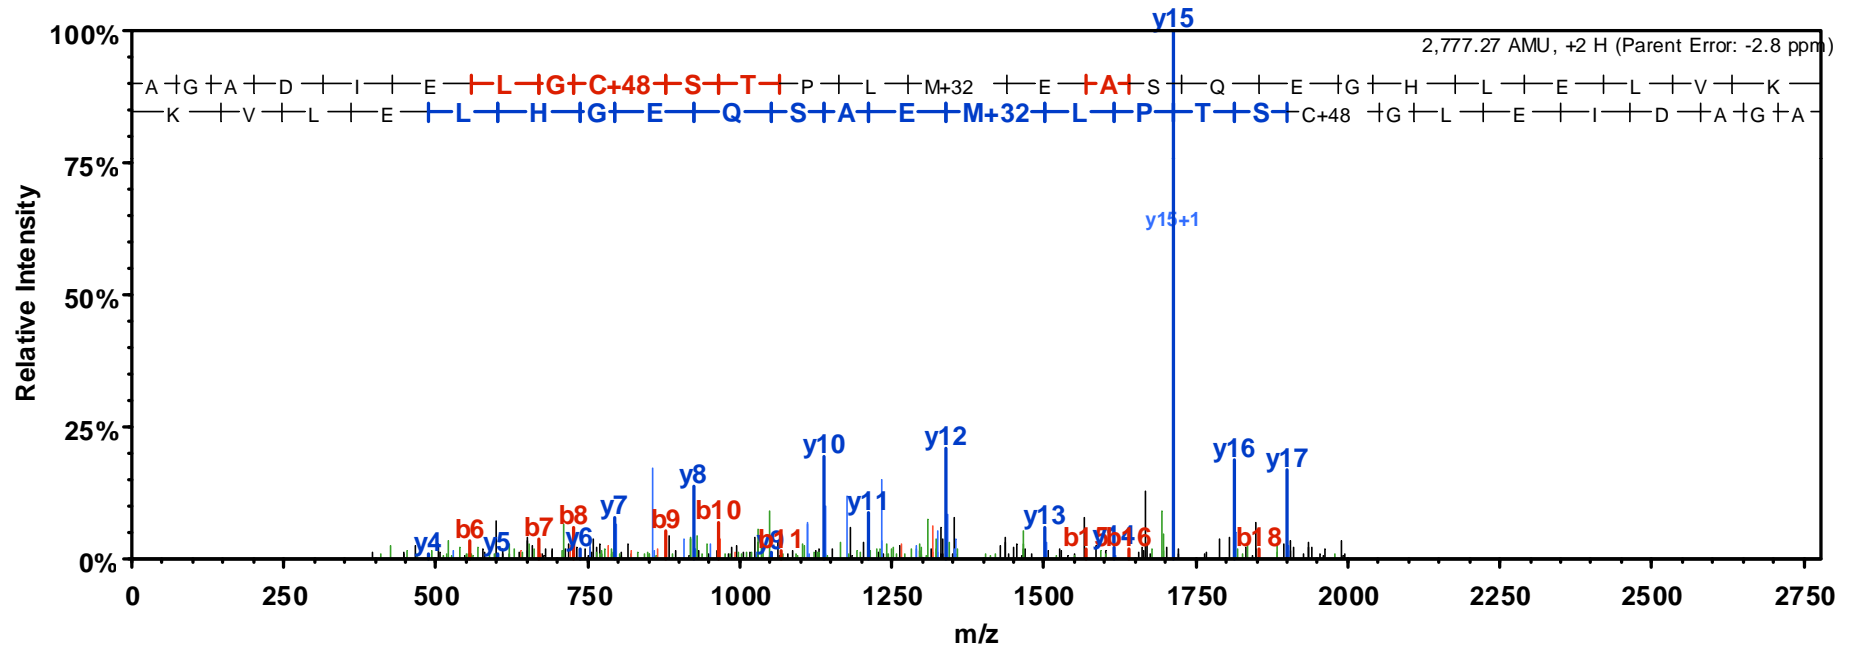

# Ankyrin repeat and KH domain-containing protein 1

AGADIELGC535STPLMEASQEGHLELVK

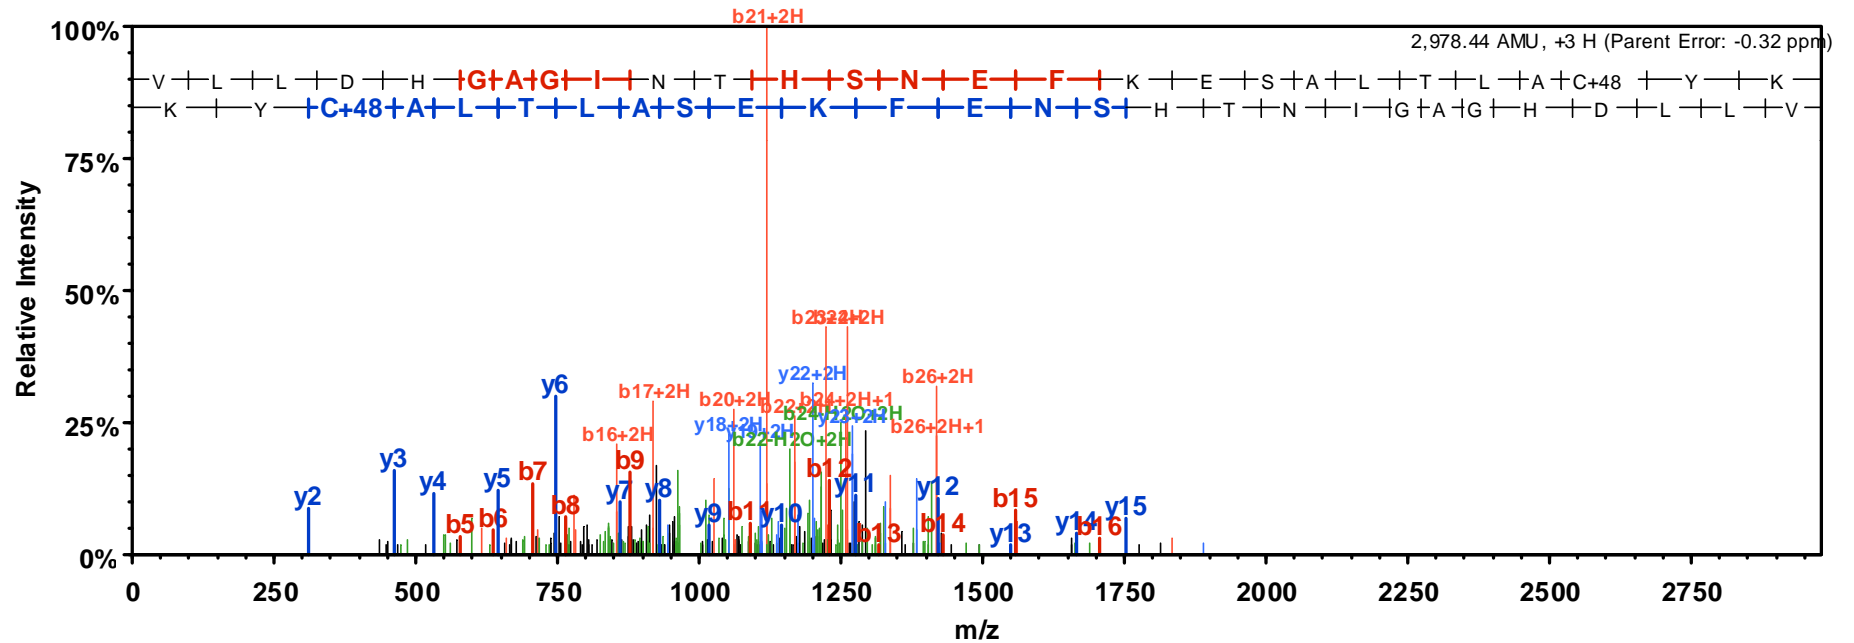

# Ankyrin repeat domain-containing protein 17

## AGADIELGC564STPLMEAAQEGHLELVK

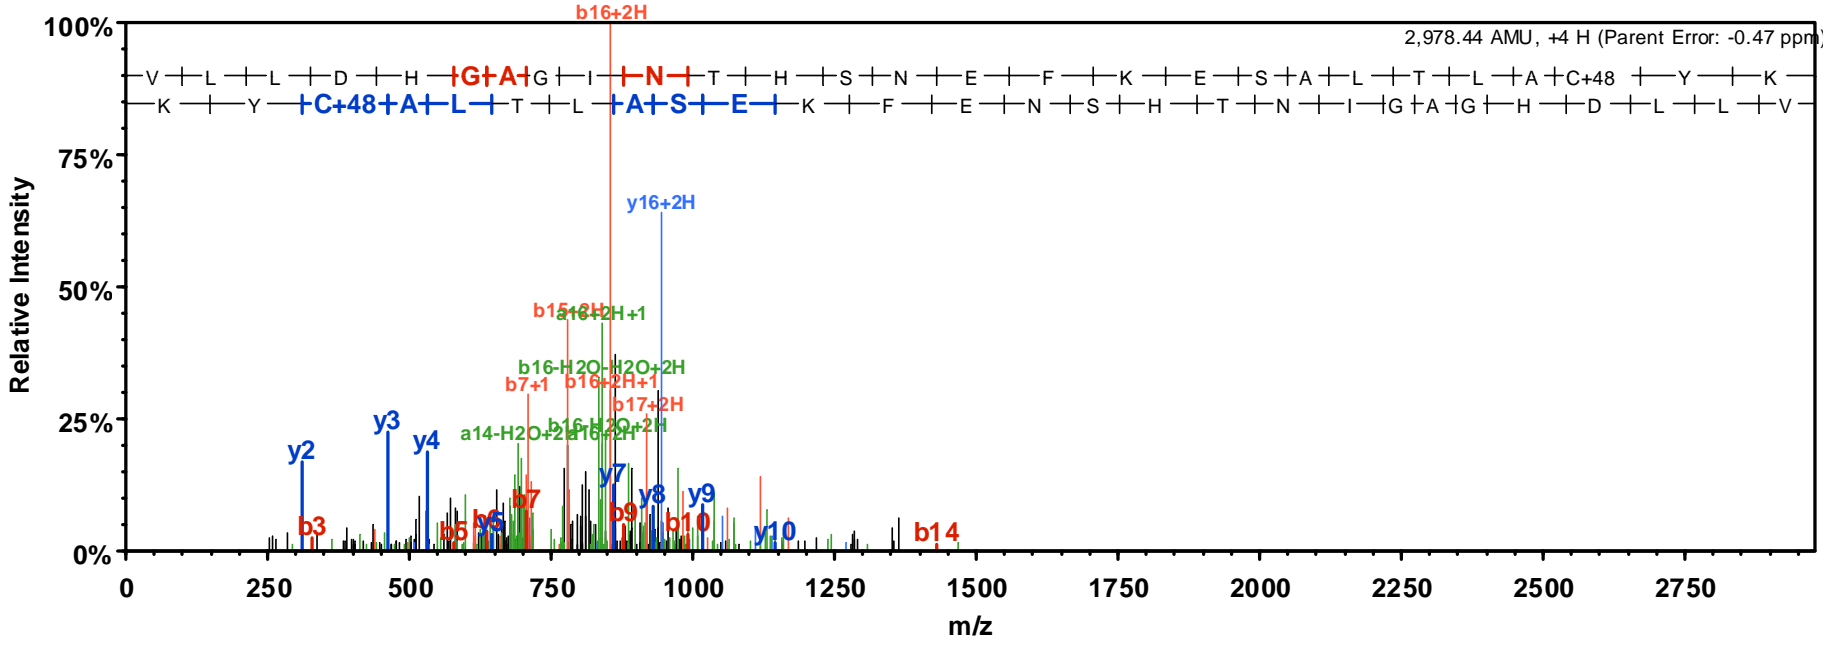

# Annexin A11 LGTDESKFNAVLC384SR

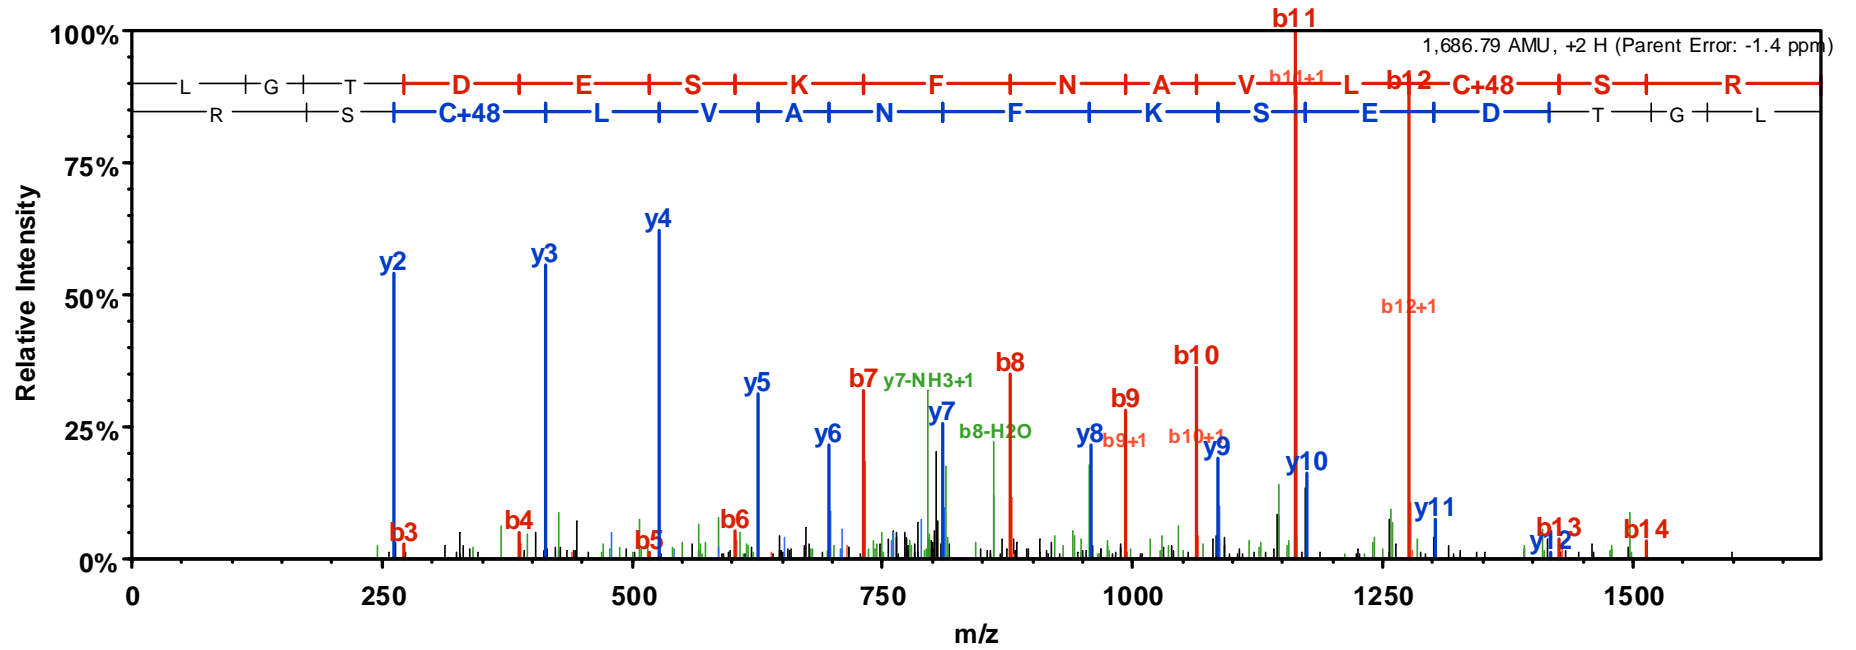

# Annexin A11 C428LKNTPAFFAER

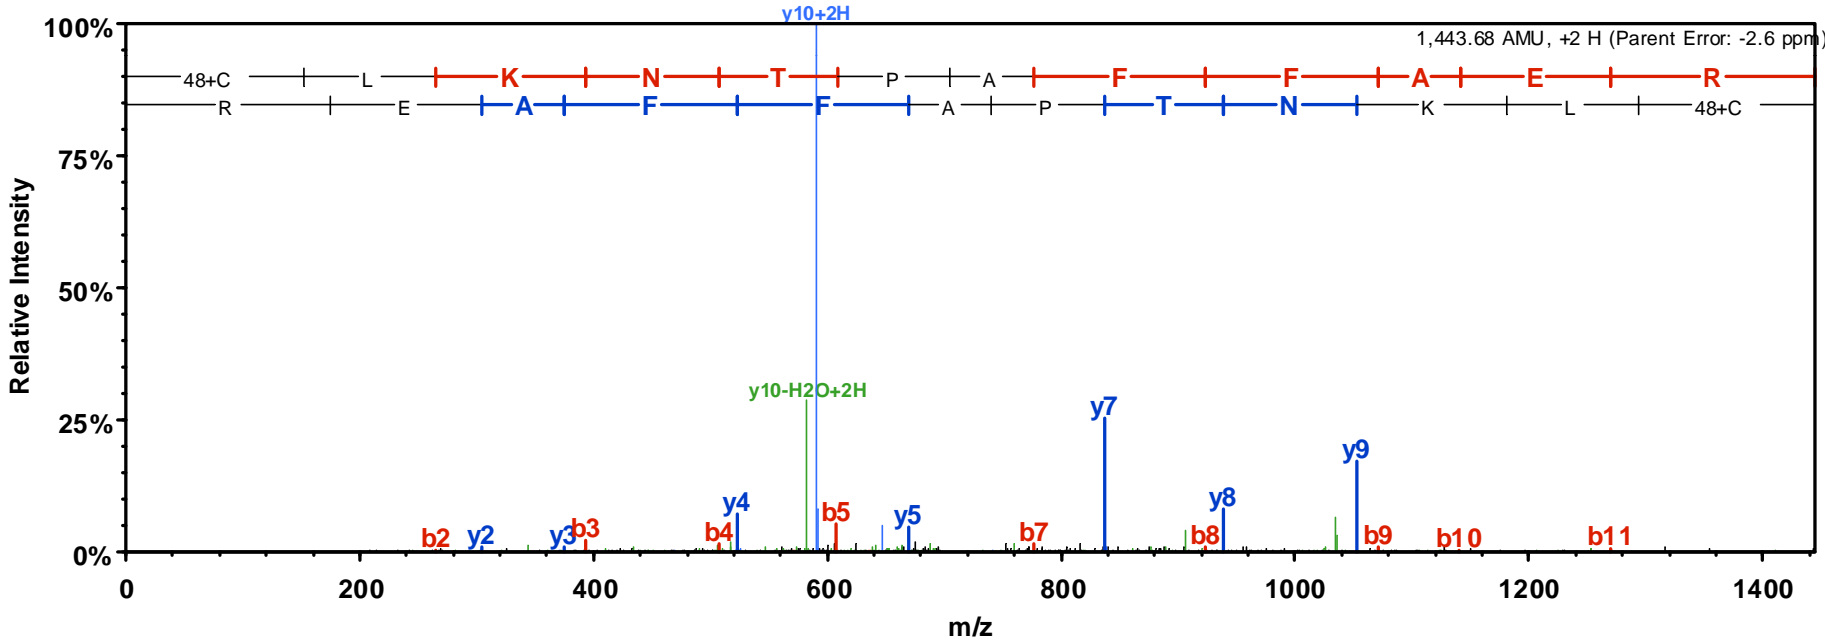

# Argininosuccinate synthase YLLGTSLARPC97IAR

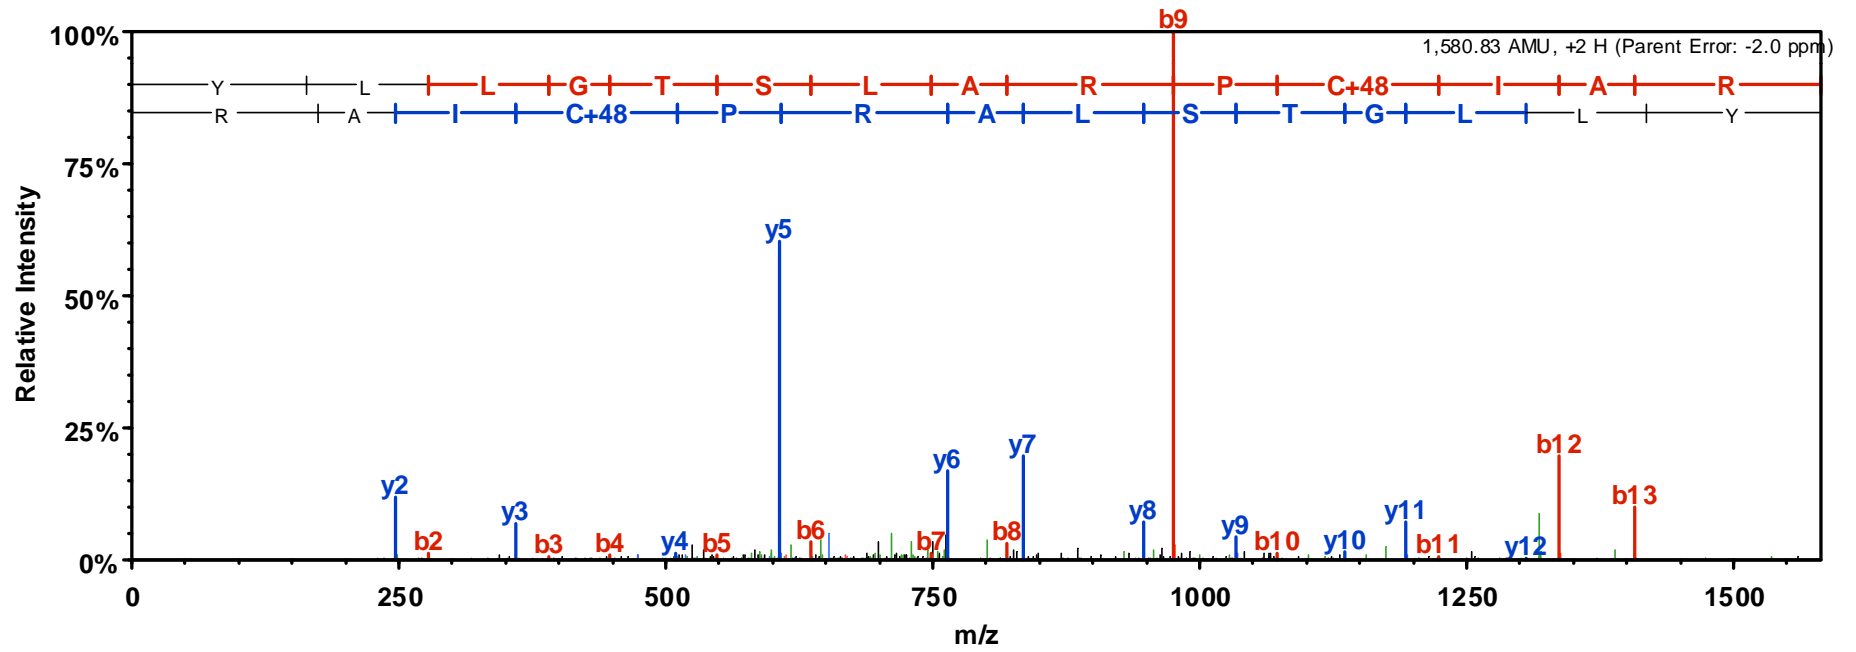

# Ataxin-2 C301DLVLDAAEHK

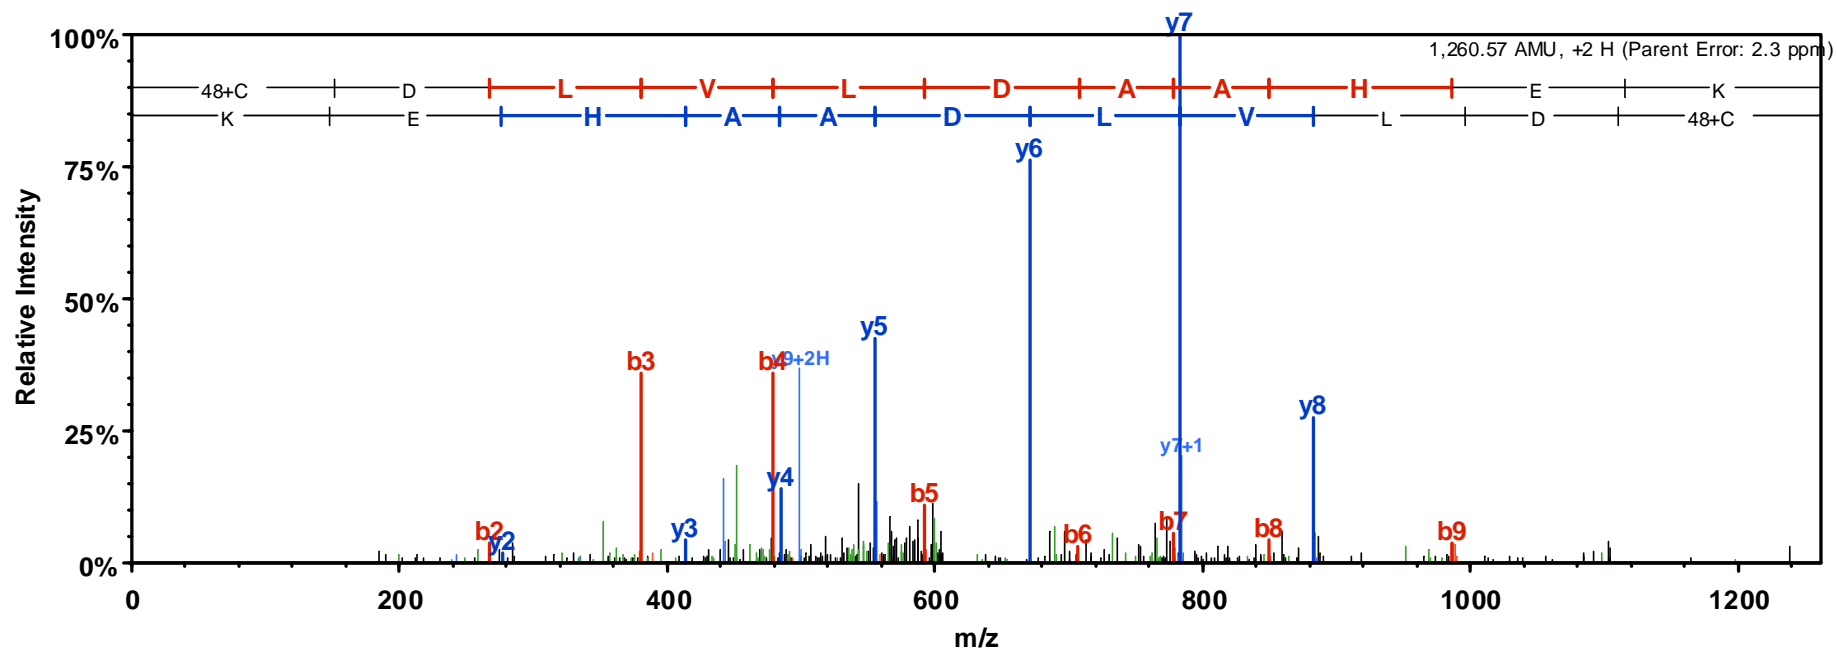



# ATP synthase subunit alpha, mitochondrial LYC244IYVAIGQKR

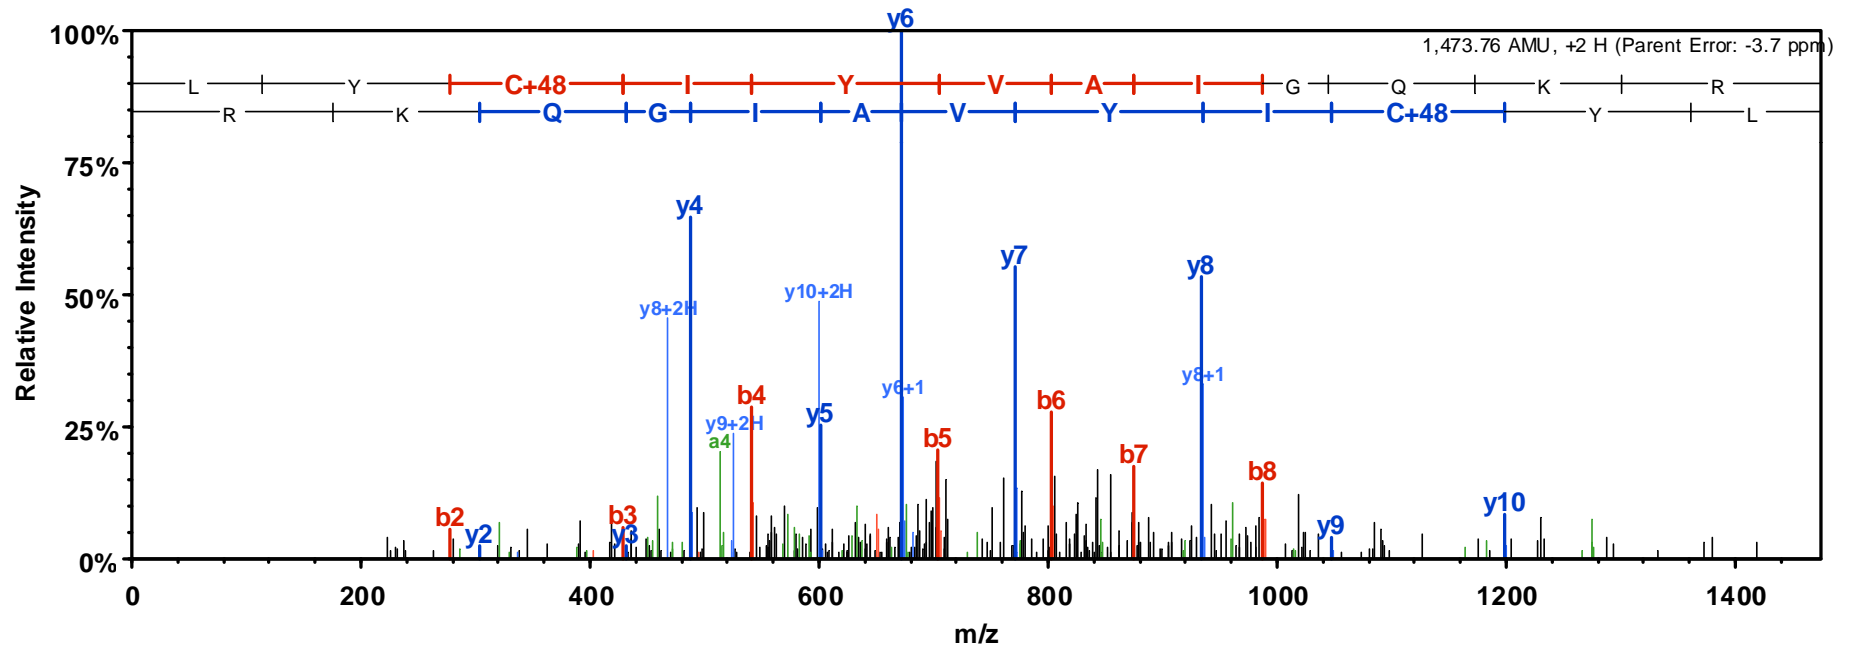

# Bcl-2-like protein 11 QPSDVSSEC12DREGR

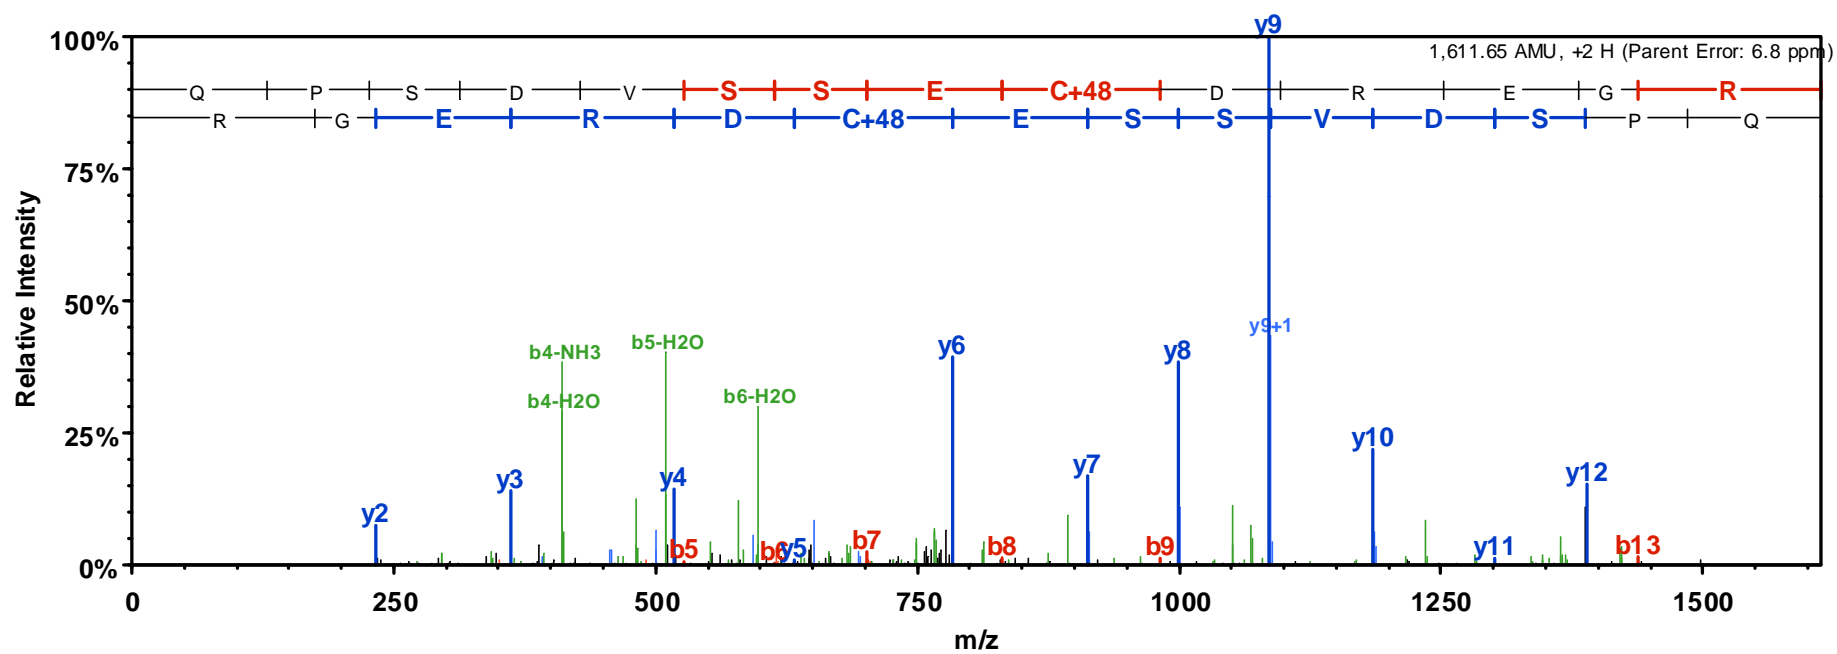

# Beta-2-glycoprotein 1 VSFFC300K

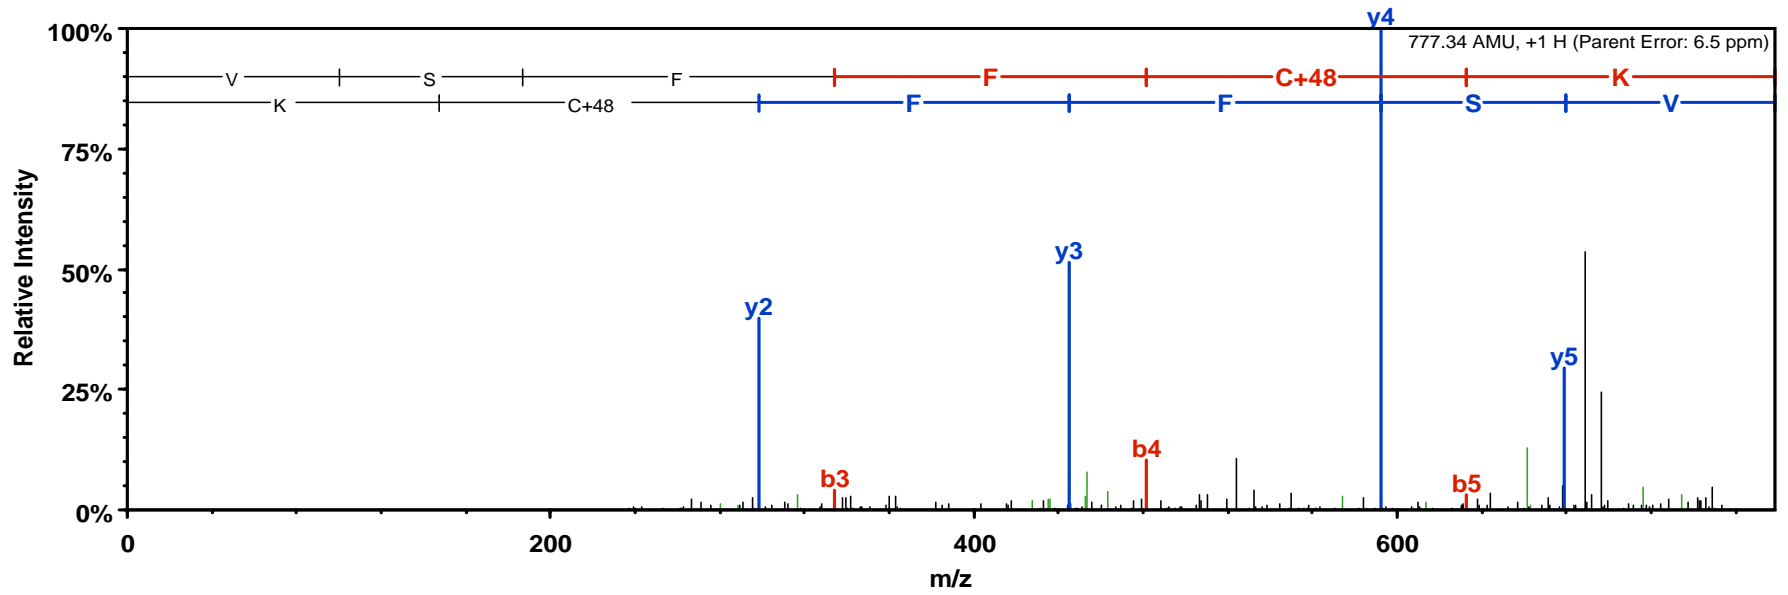

Carbonic anhydrase 3  
TC66RVVFDDTYDR

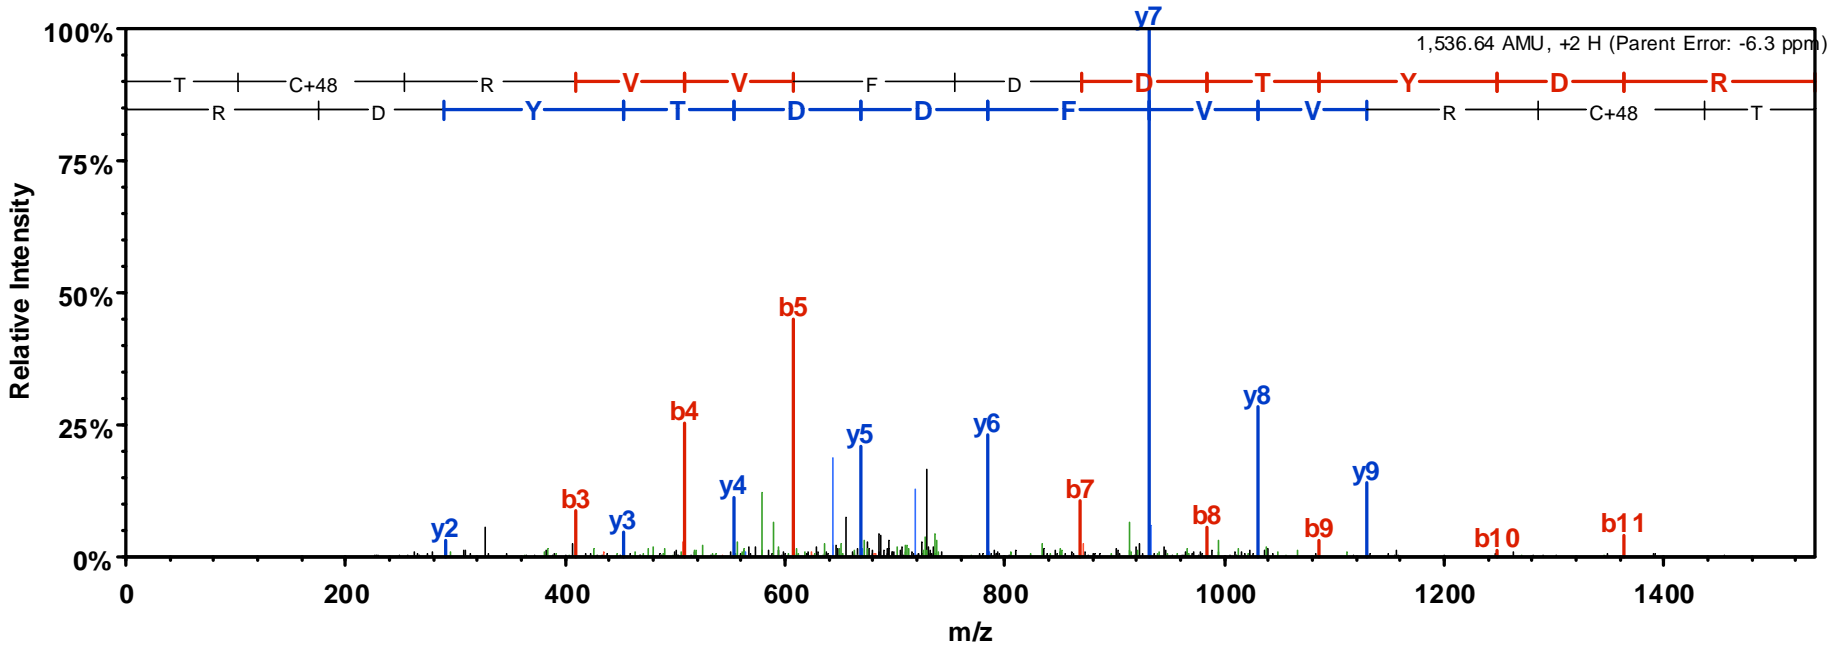

# Caspase recruitment domain-containing protein 9 C178KEENYDLAMR

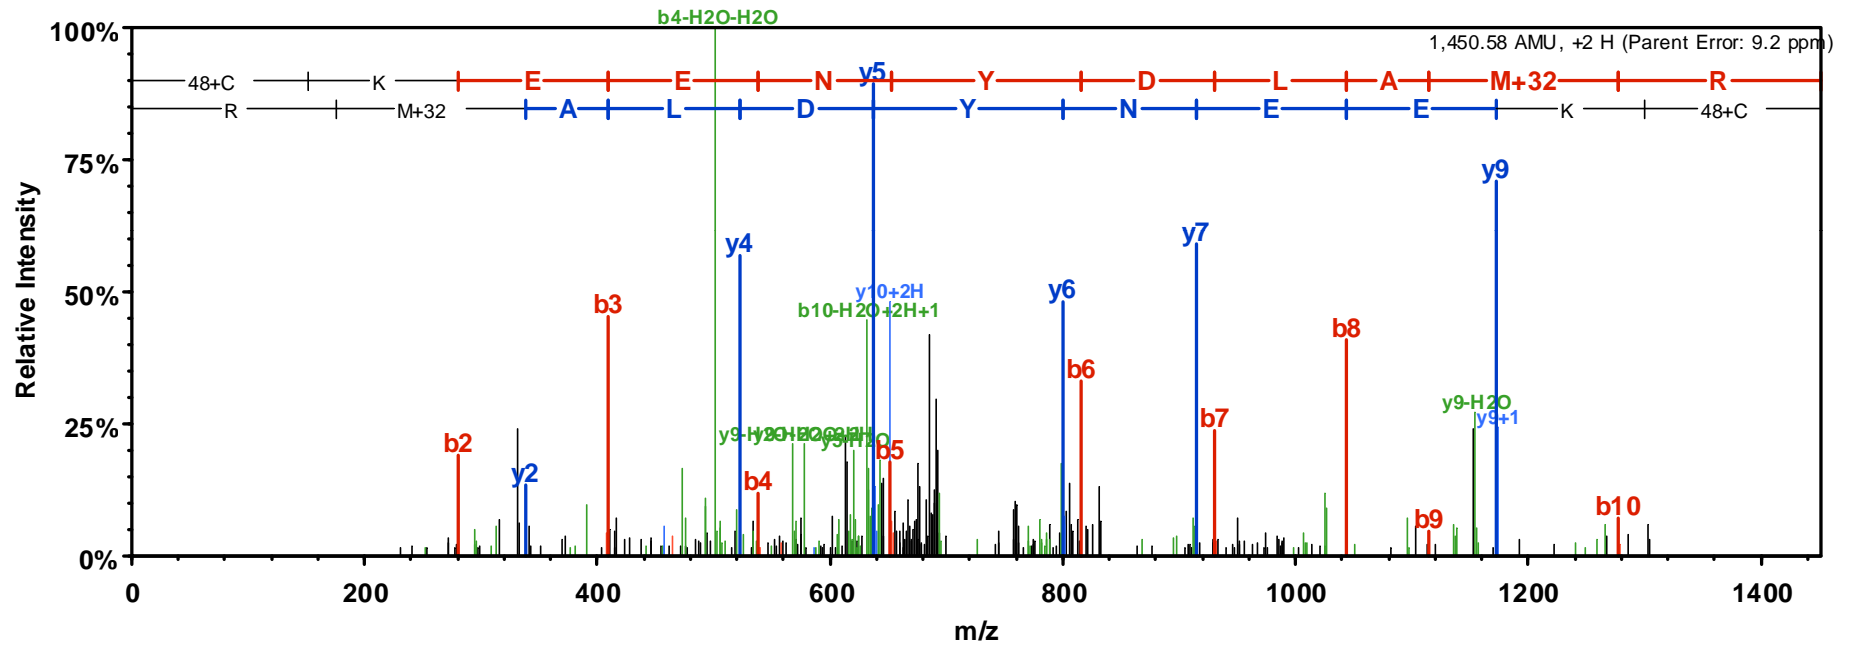

# Catalase LC460ENIAGHLK

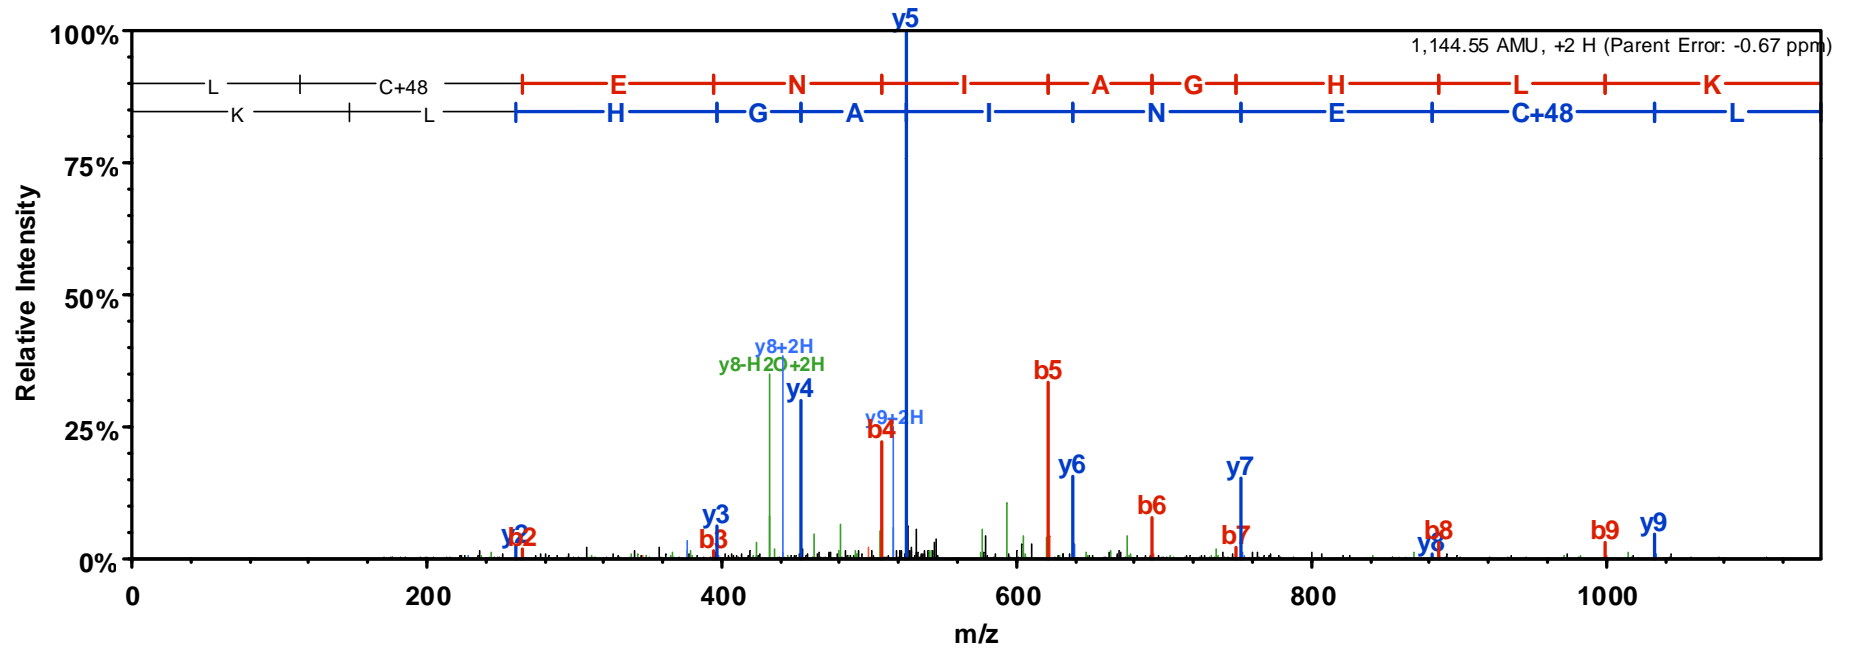

# Catenin beta-1

NLALC520PANHAPLREQGAIPR

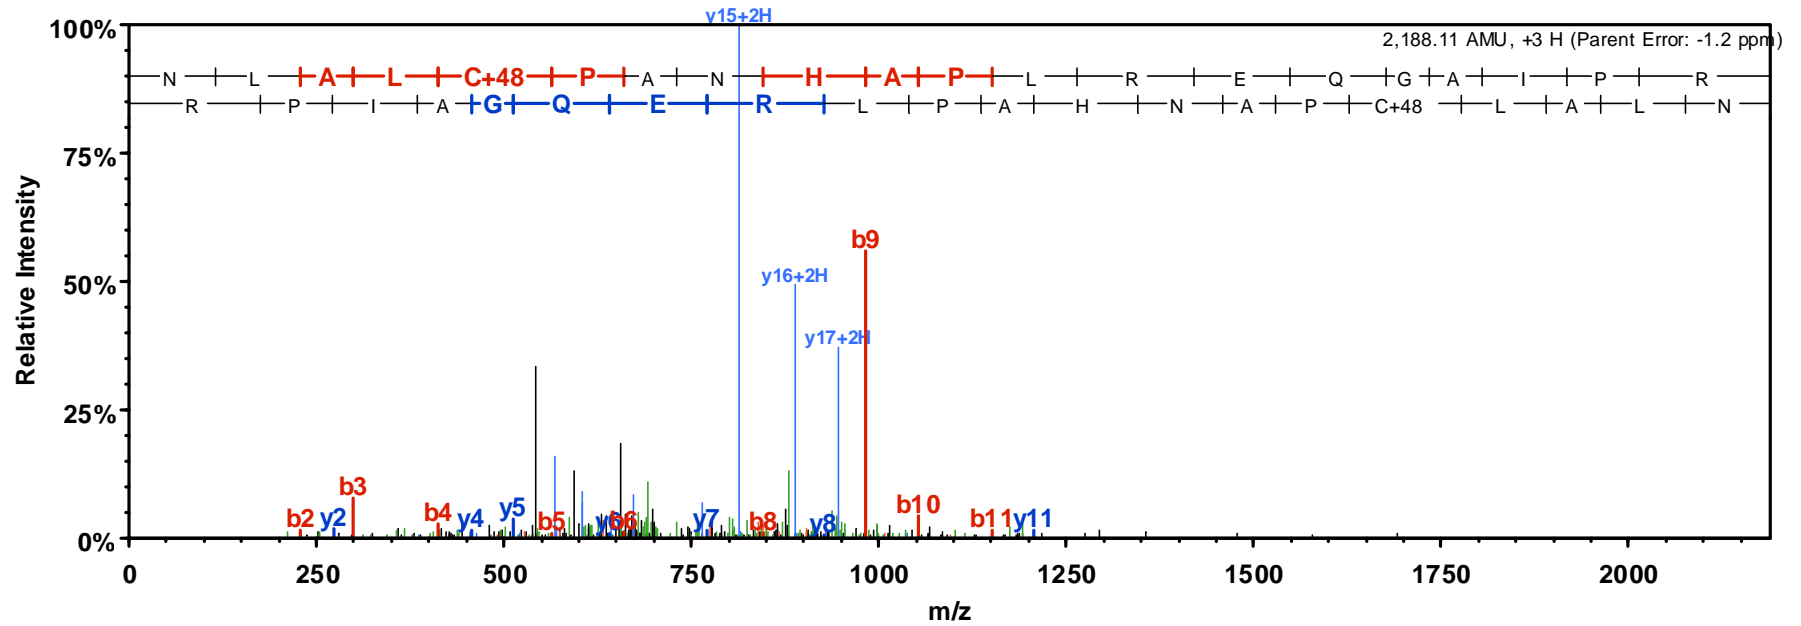

# Chloride intracellular channel protein 1 IGNC24PFSQR

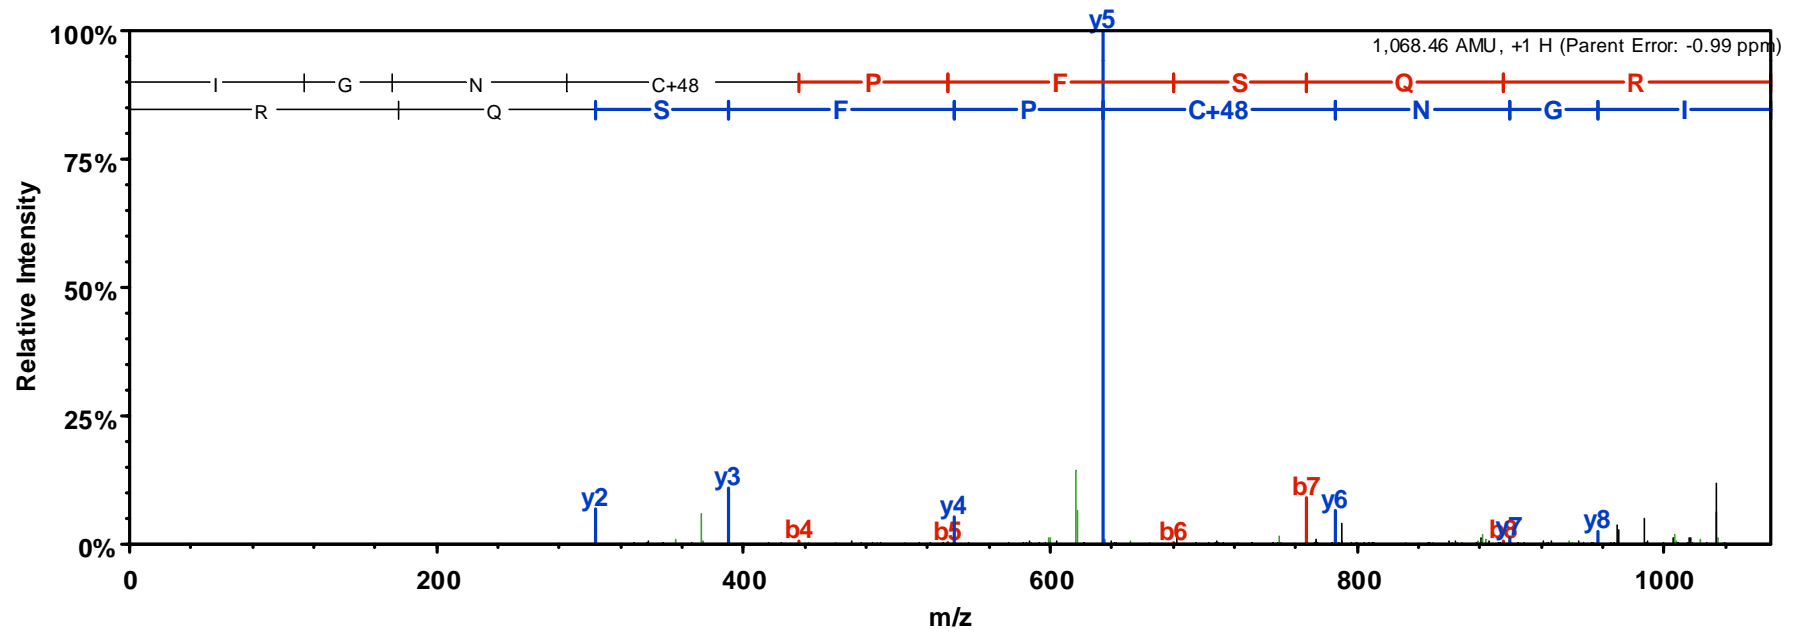



# Chloride intracellular channel protein 1

LC59PGGQLPFLLYGTEVHTDTNK

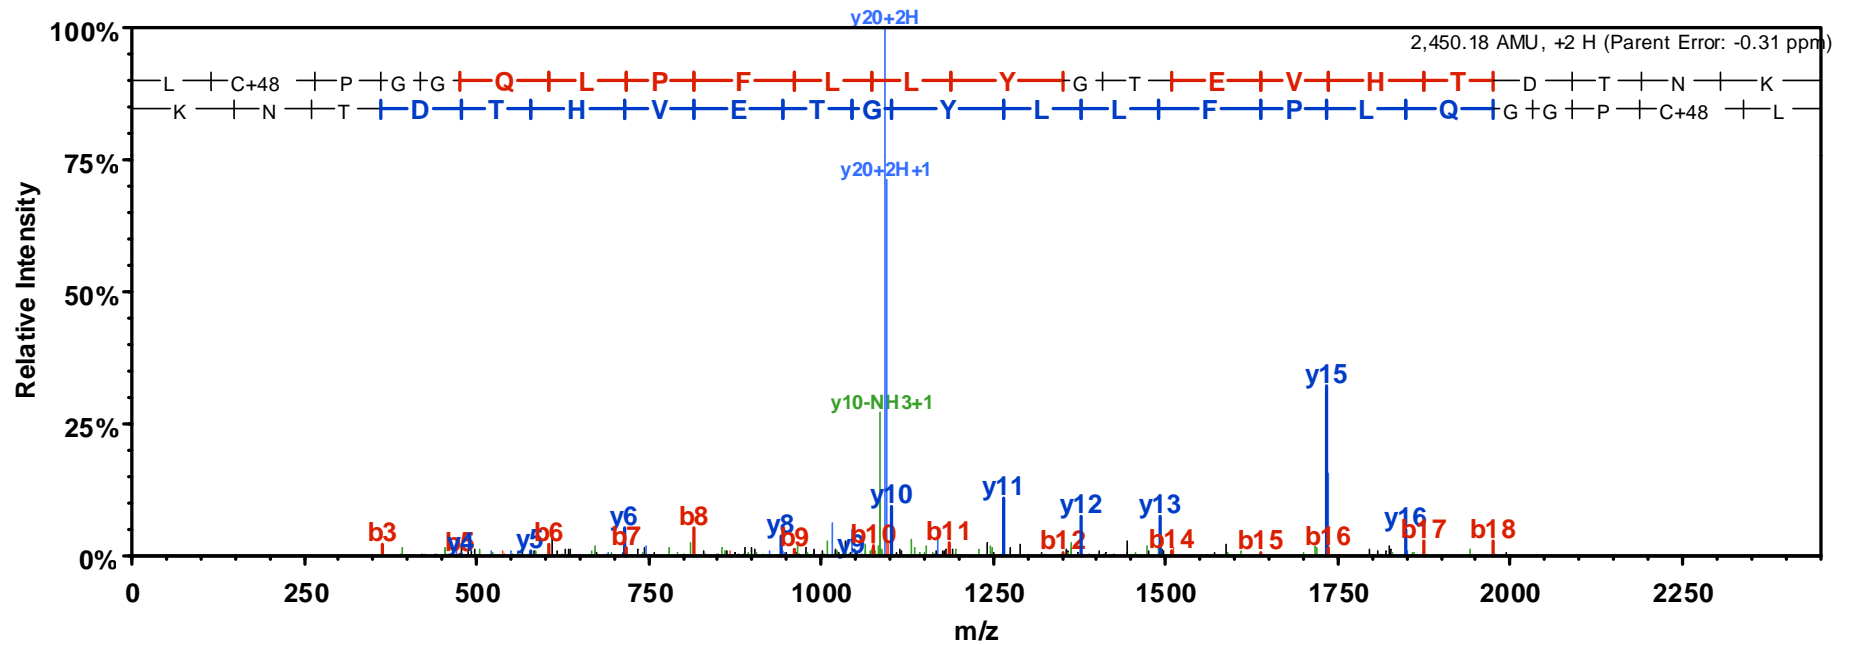

# Chloride intracellular channel protein 1

KFLDGNELTLADC178NLLPK

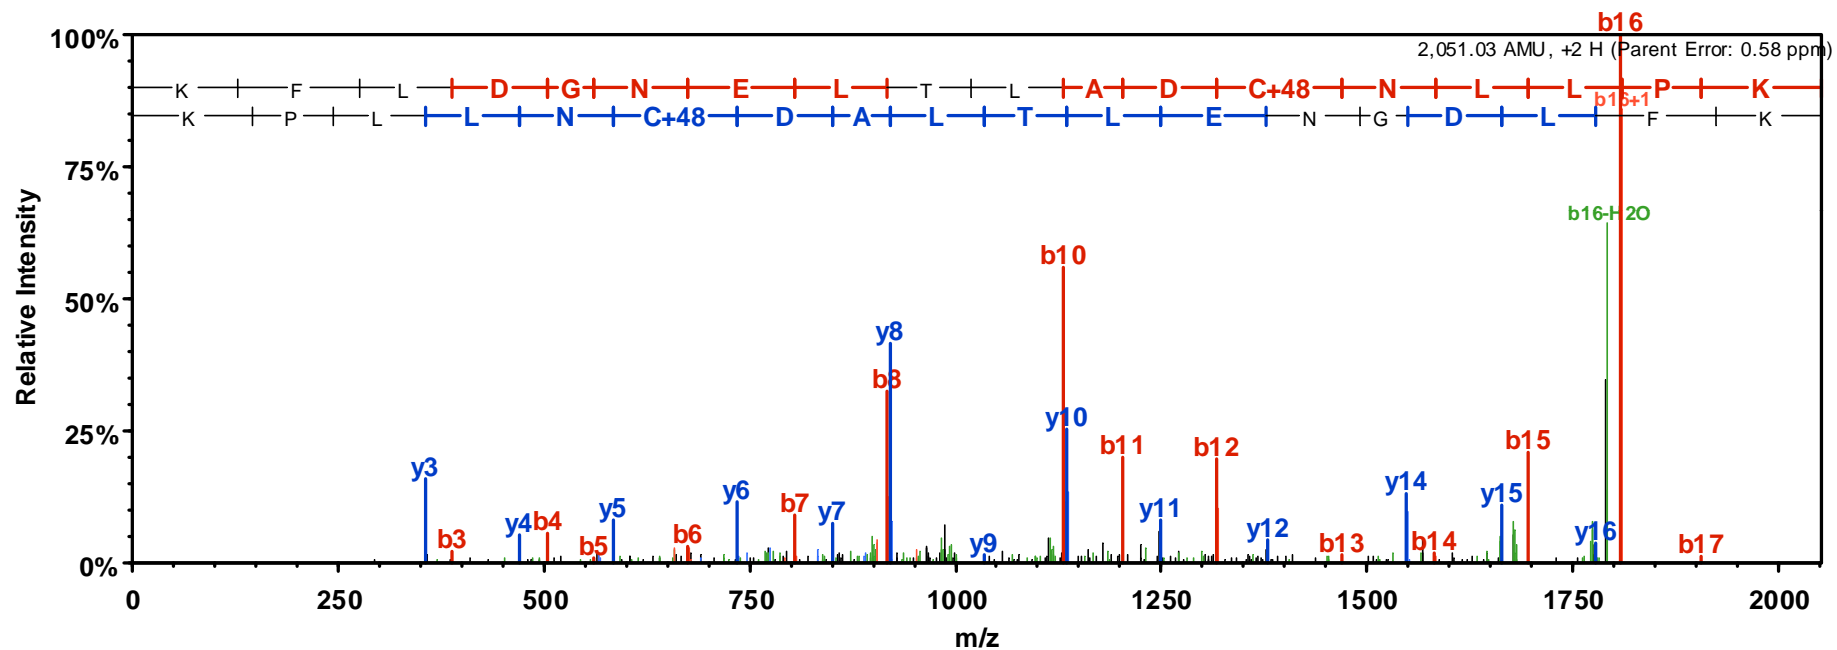

# Chloride intracellular channel protein 1

## LHIVQVVC191KKYR

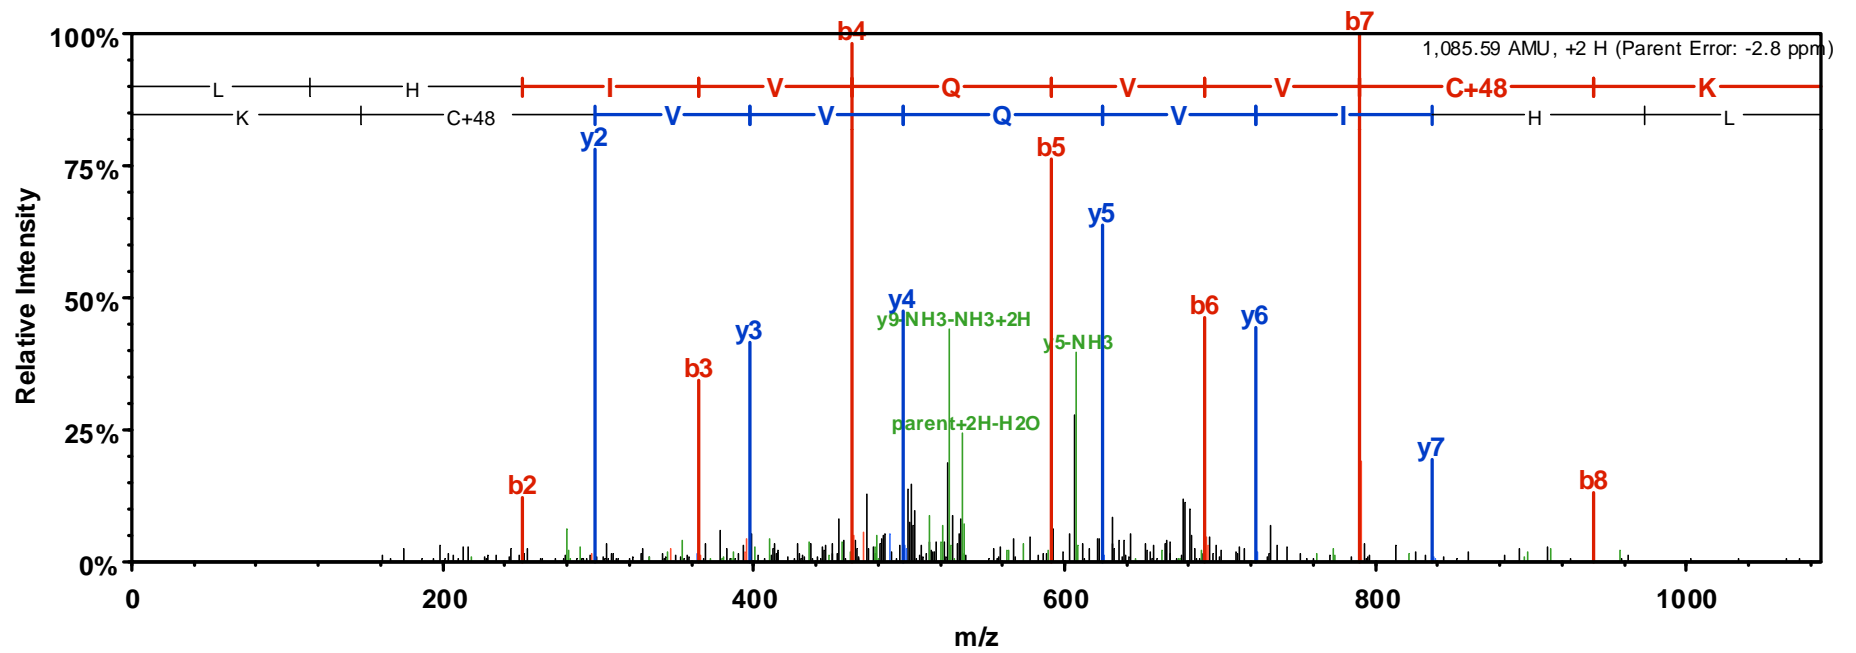

# Chromobox protein homolog 1

EANVKC156PQVVVISFYEER

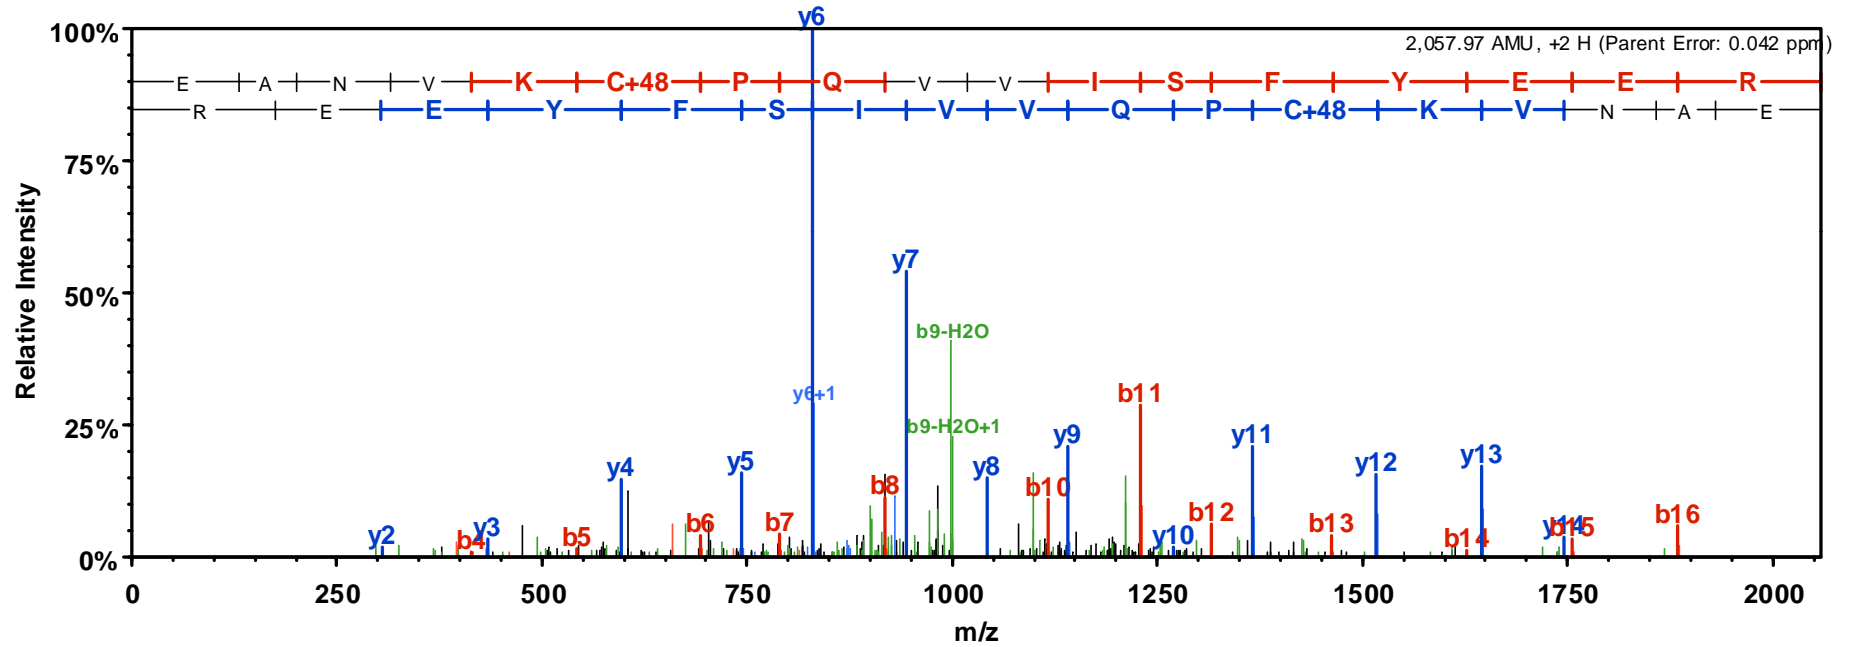

# Cofilin-1

## AVLFC39LSEDKK

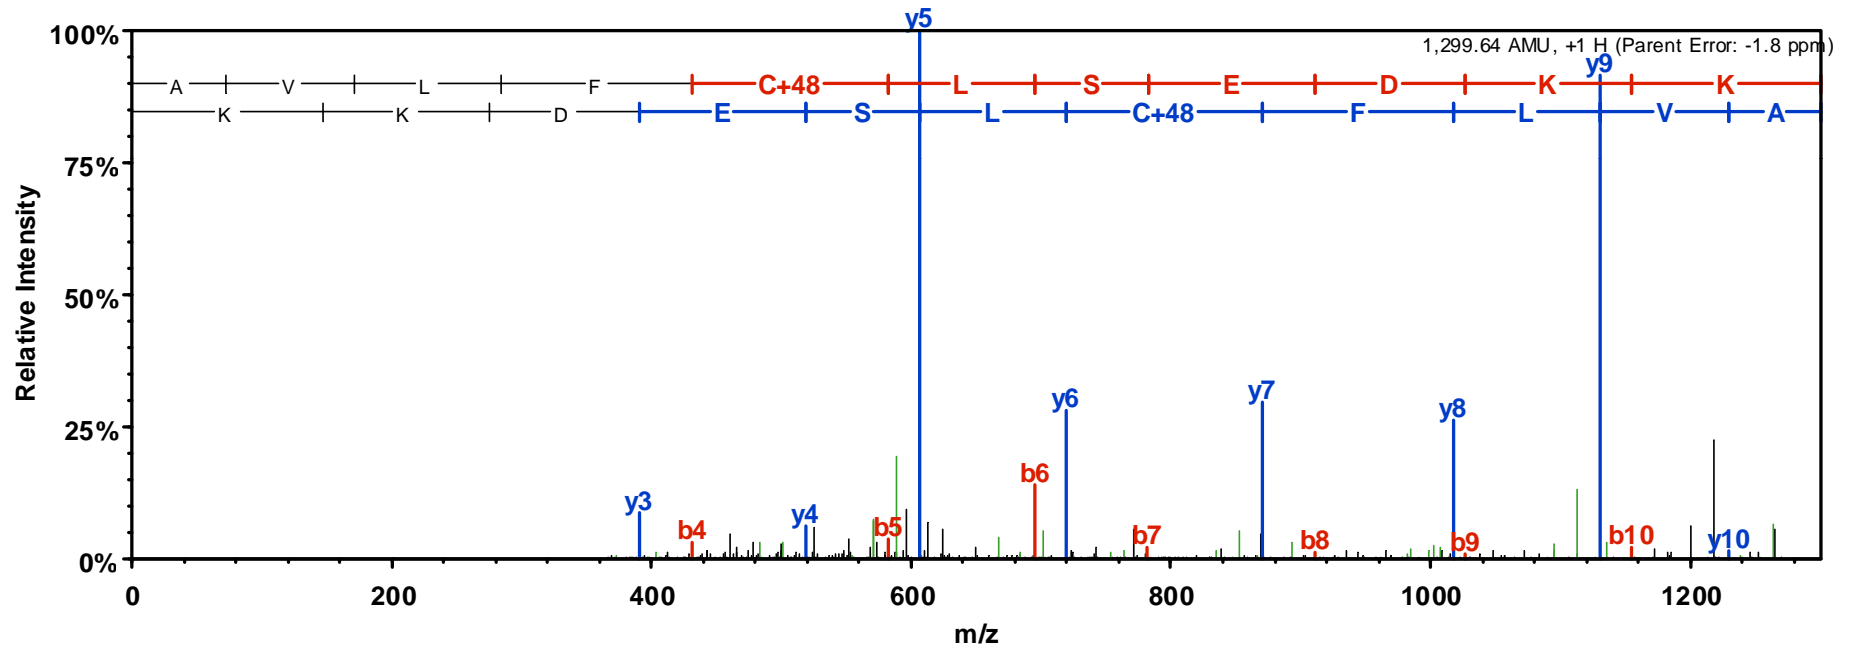

# Cofilin-1

MLPDKDC80RYALYDATYETK

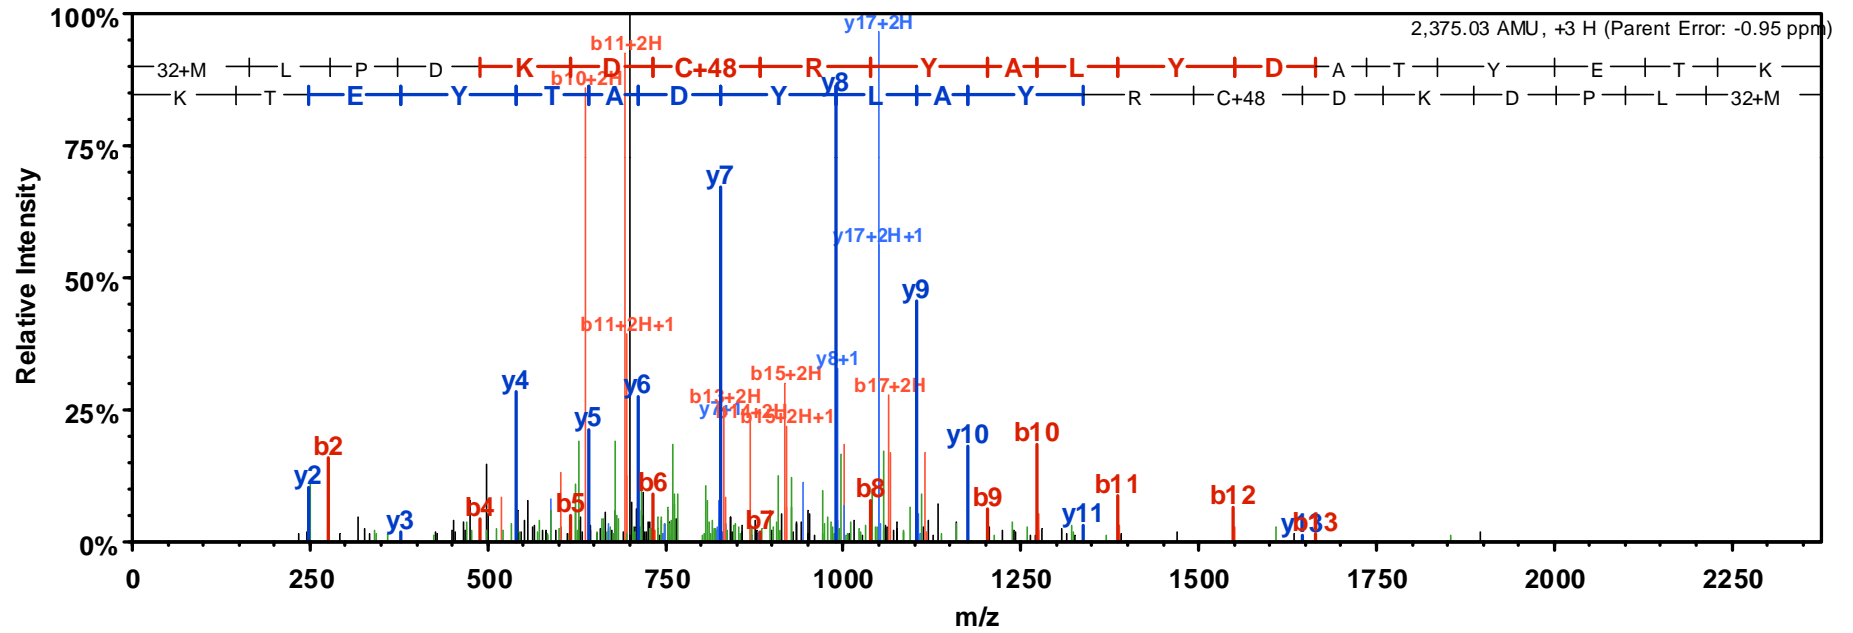

# Cofilin-1 HELQANC139YEEVKDR

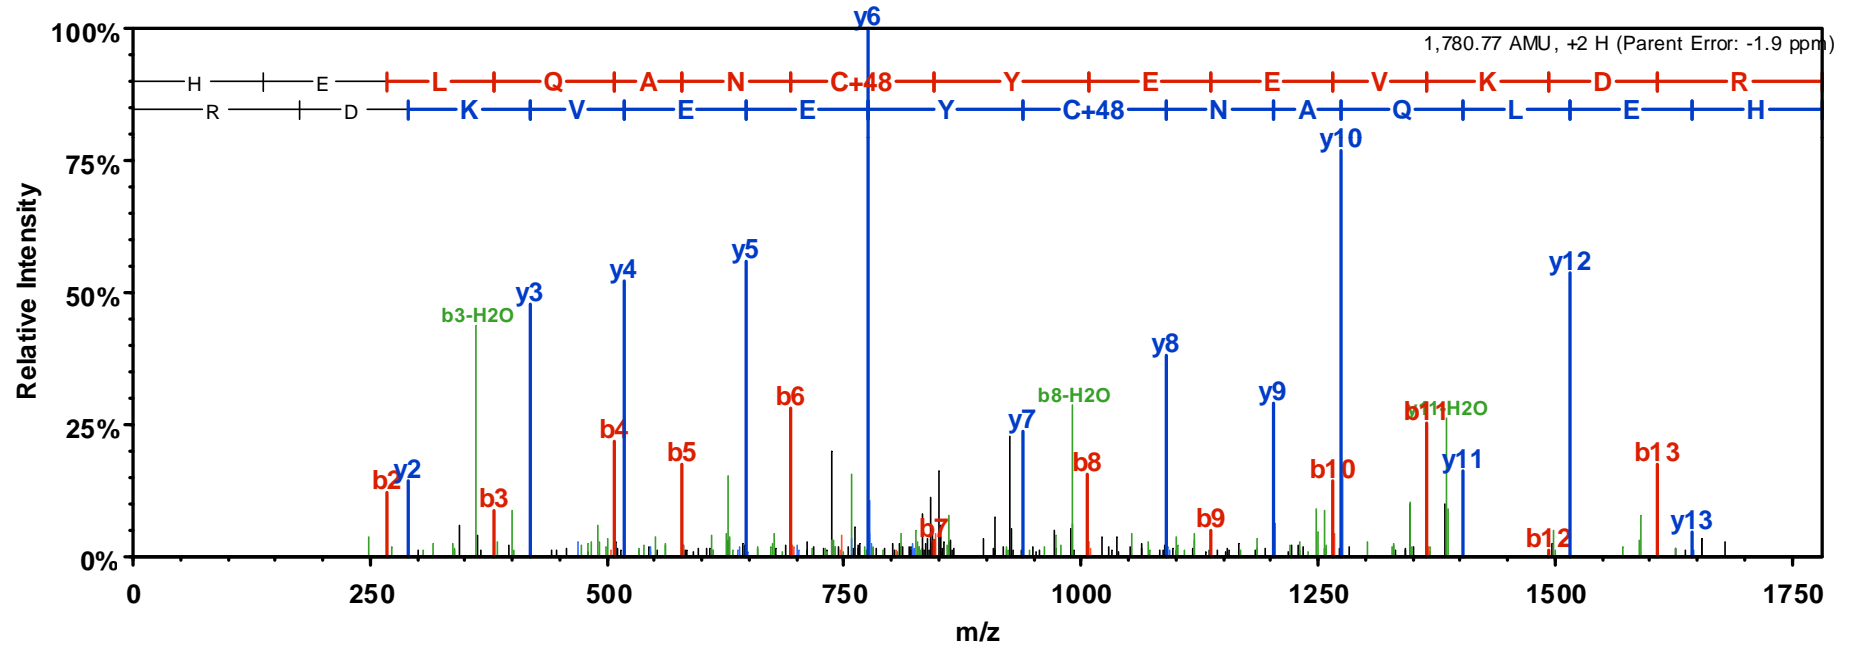

# Colorectal mutant cancer protein LAKAQC58EQSHLMREHEDVQER

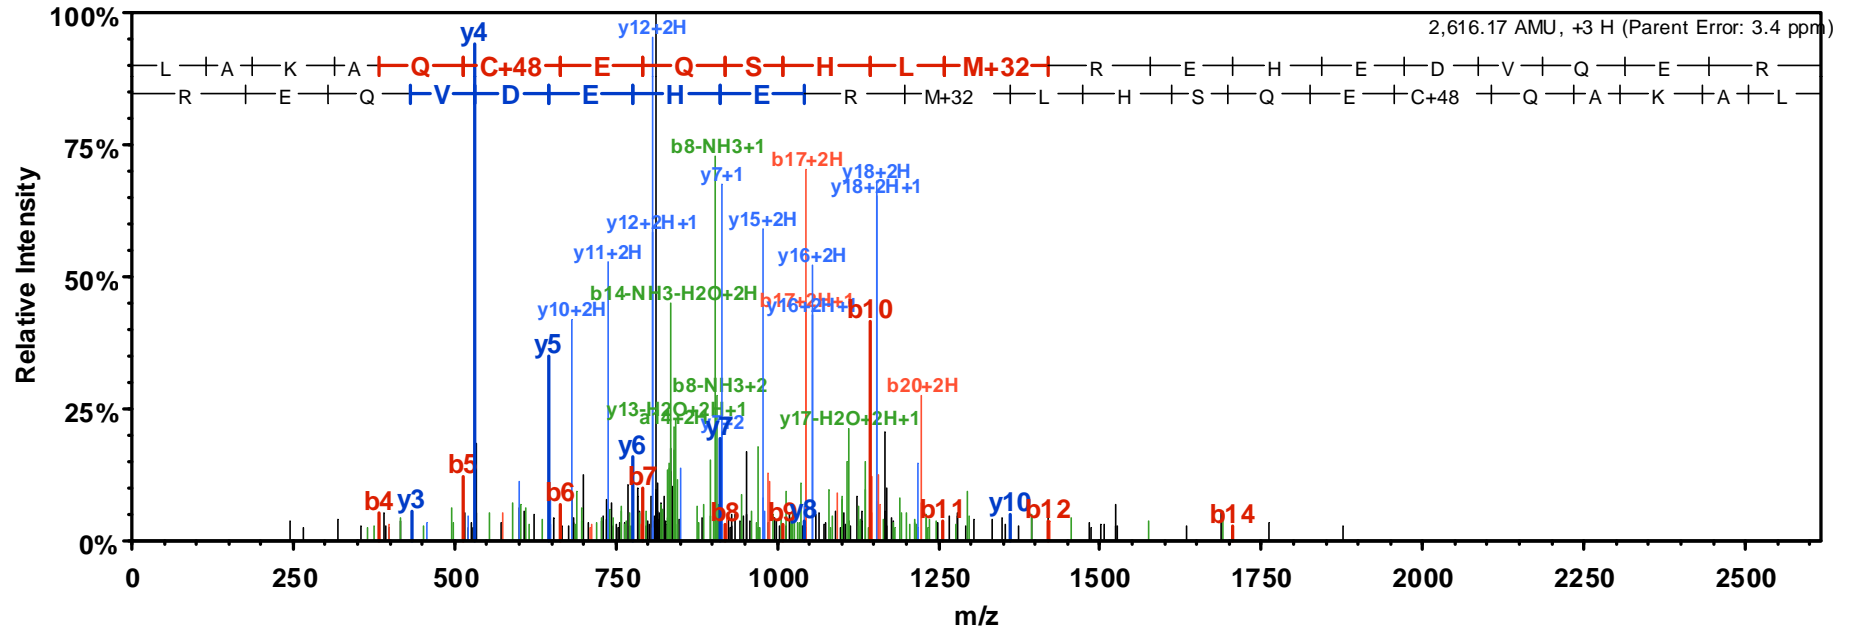



# COMM domain-containing protein 9 QLC28QESFSSALGLKK

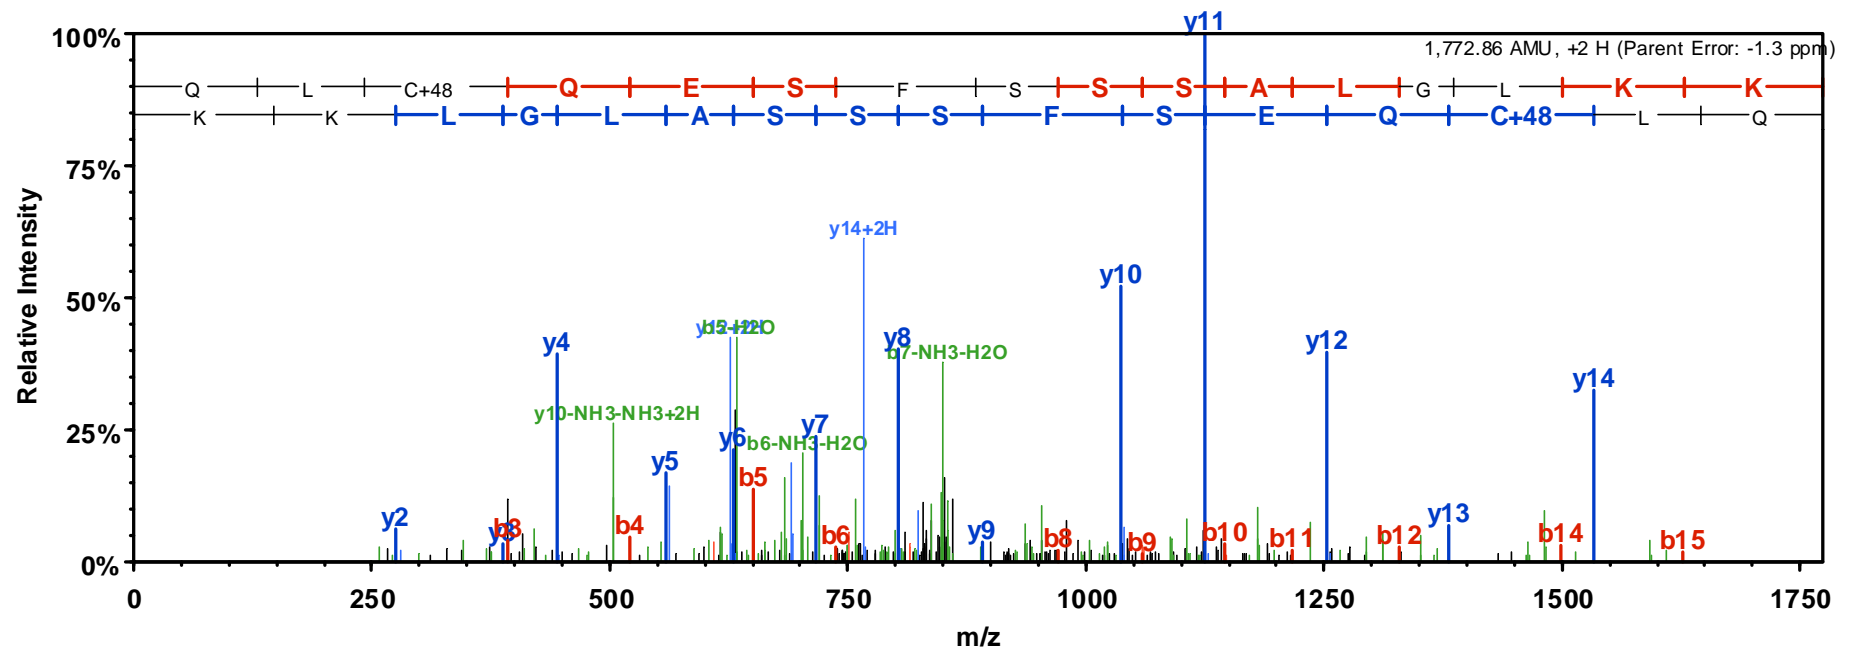

COMM domain-containing protein 9  
KLLDVTC47SSLSVTQEEAEELLQALHR

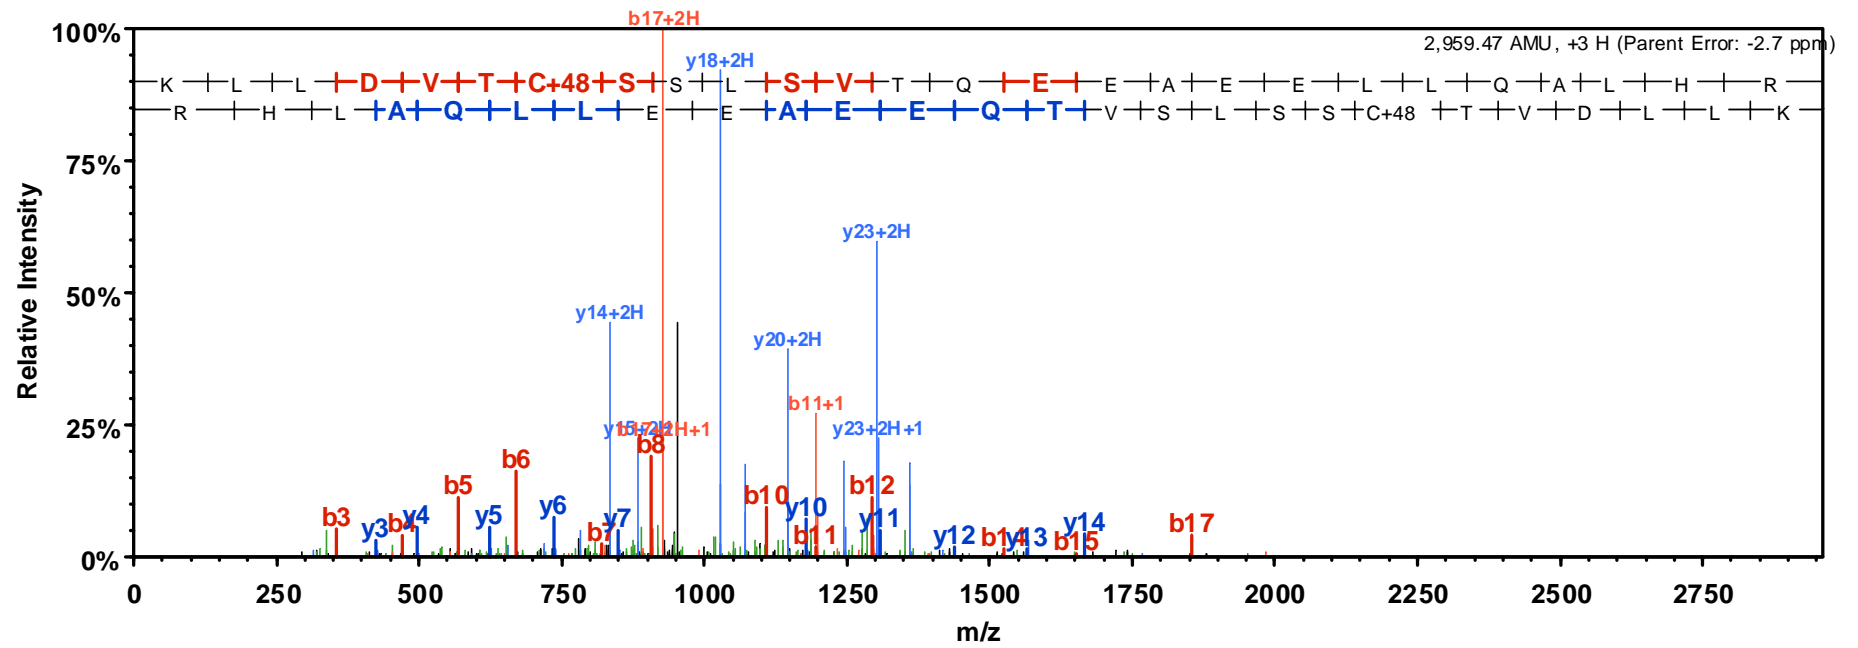

COMM domain-containing protein 9  
MAVPTC147LLQMK

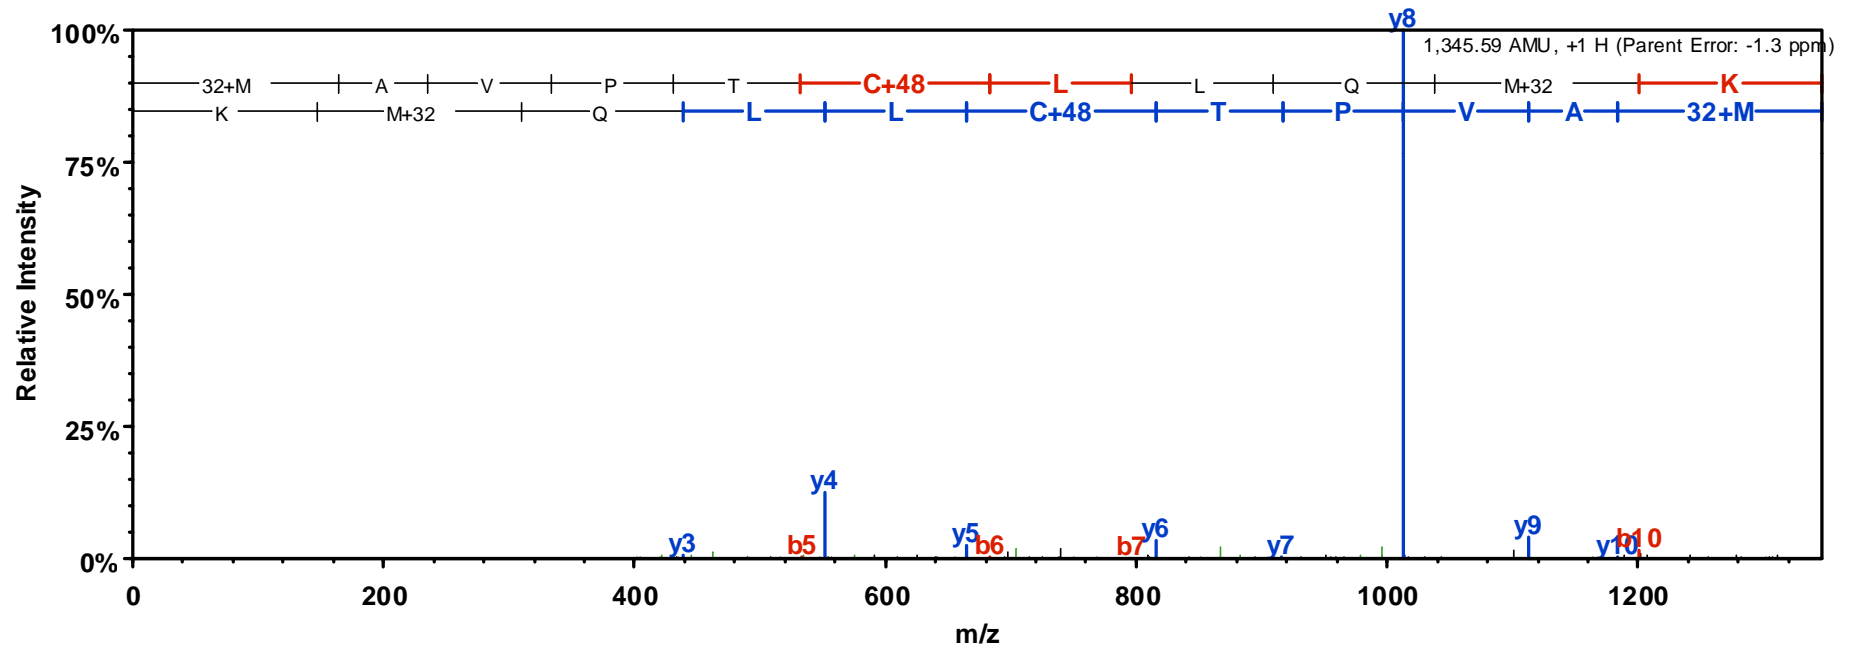

# Core-binding factor subunit beta LSREC25EIKYTGFR

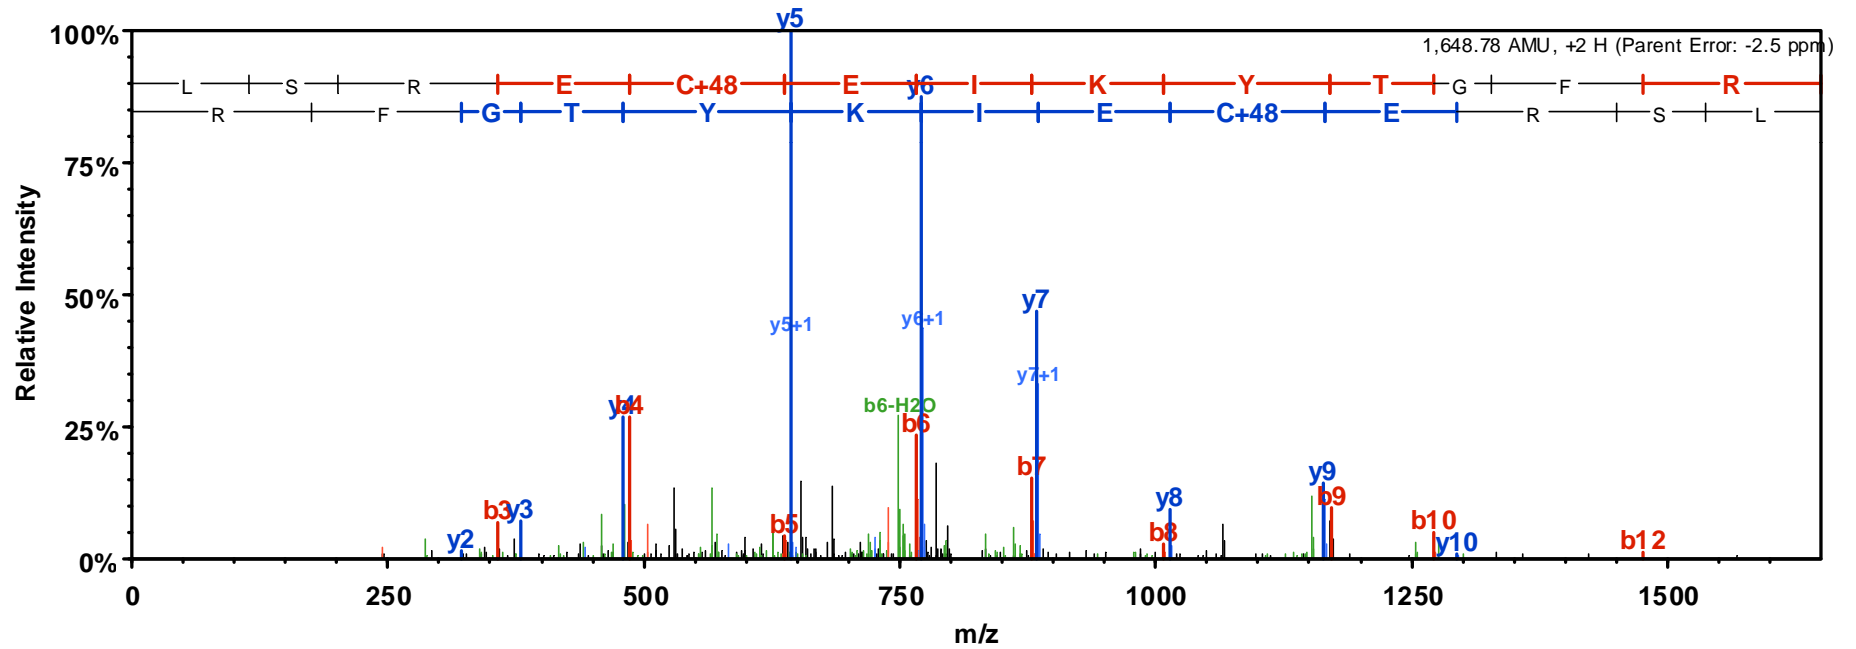

# Cornifin-A

EPC41HPKVPEPC49HPKVPEPC57QPK

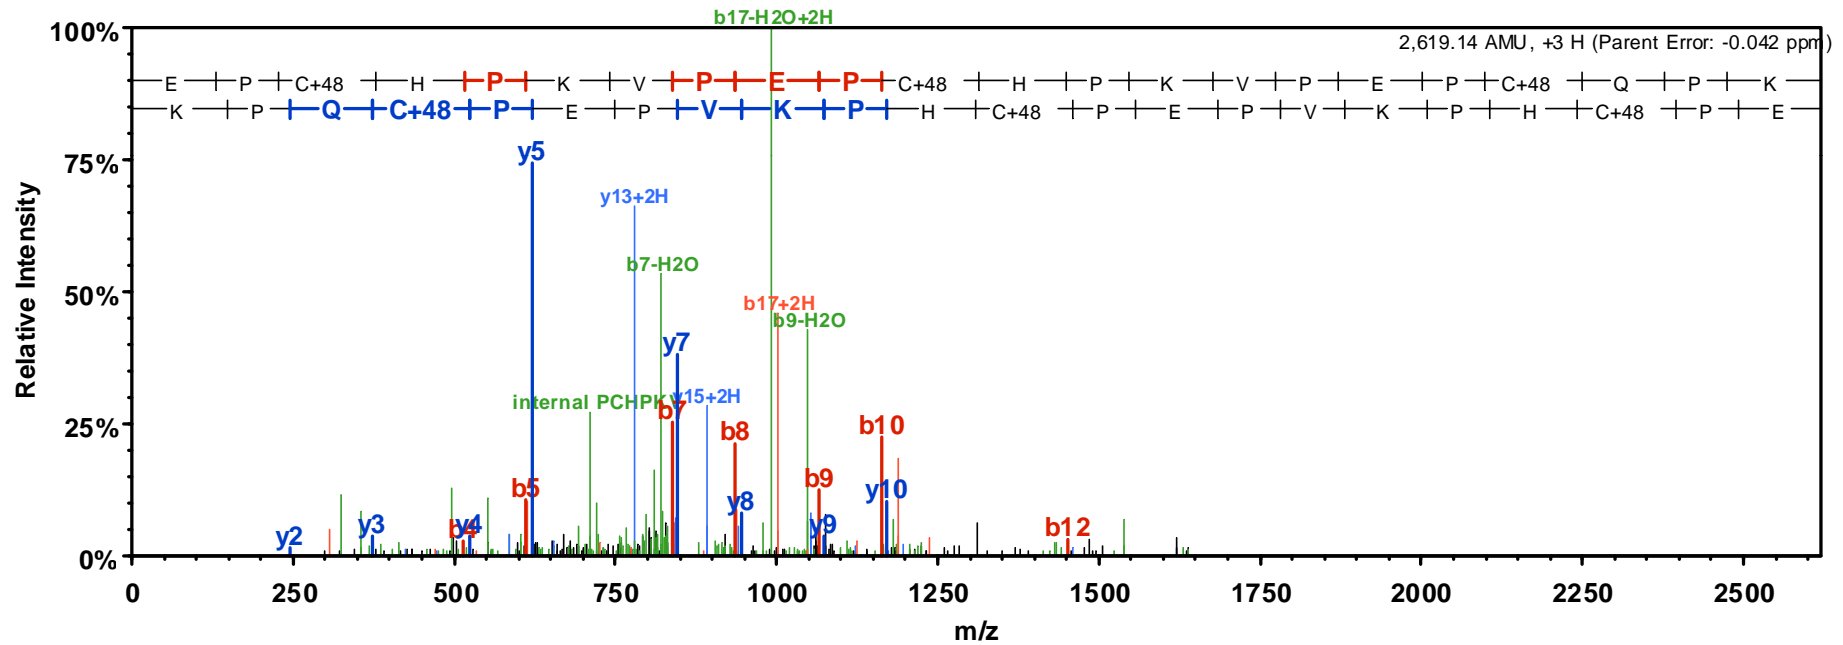

# Creatine kinase, ubiquitous mitochondrial HNNC62MASHLTPAVYAR

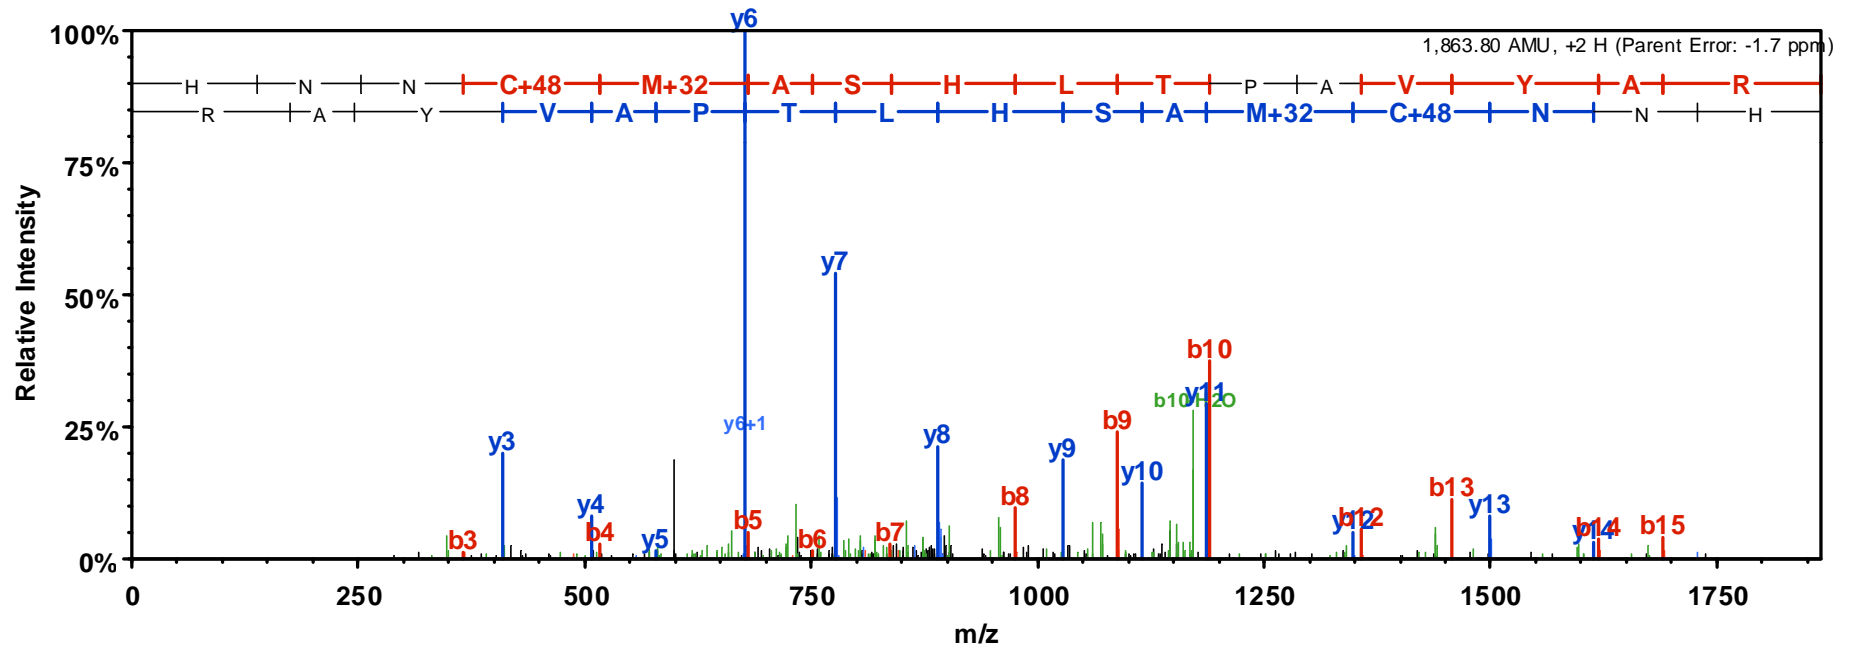

# C-terminal-binding protein DVATVAFC54DAQSTQEIKEK

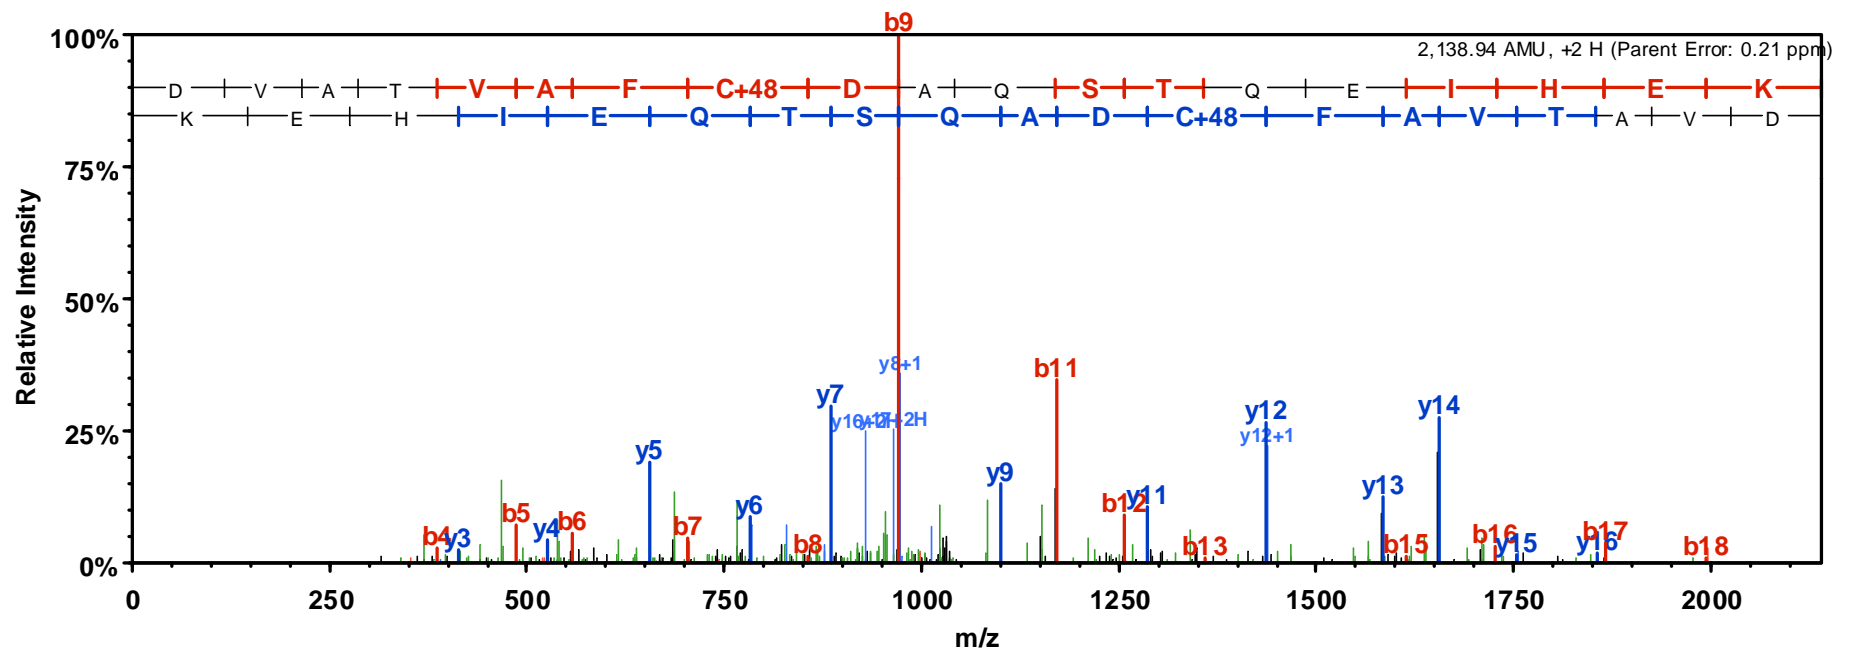

C-terminal-binding protein  
IPDSLKNC350VNKDHLTAATH

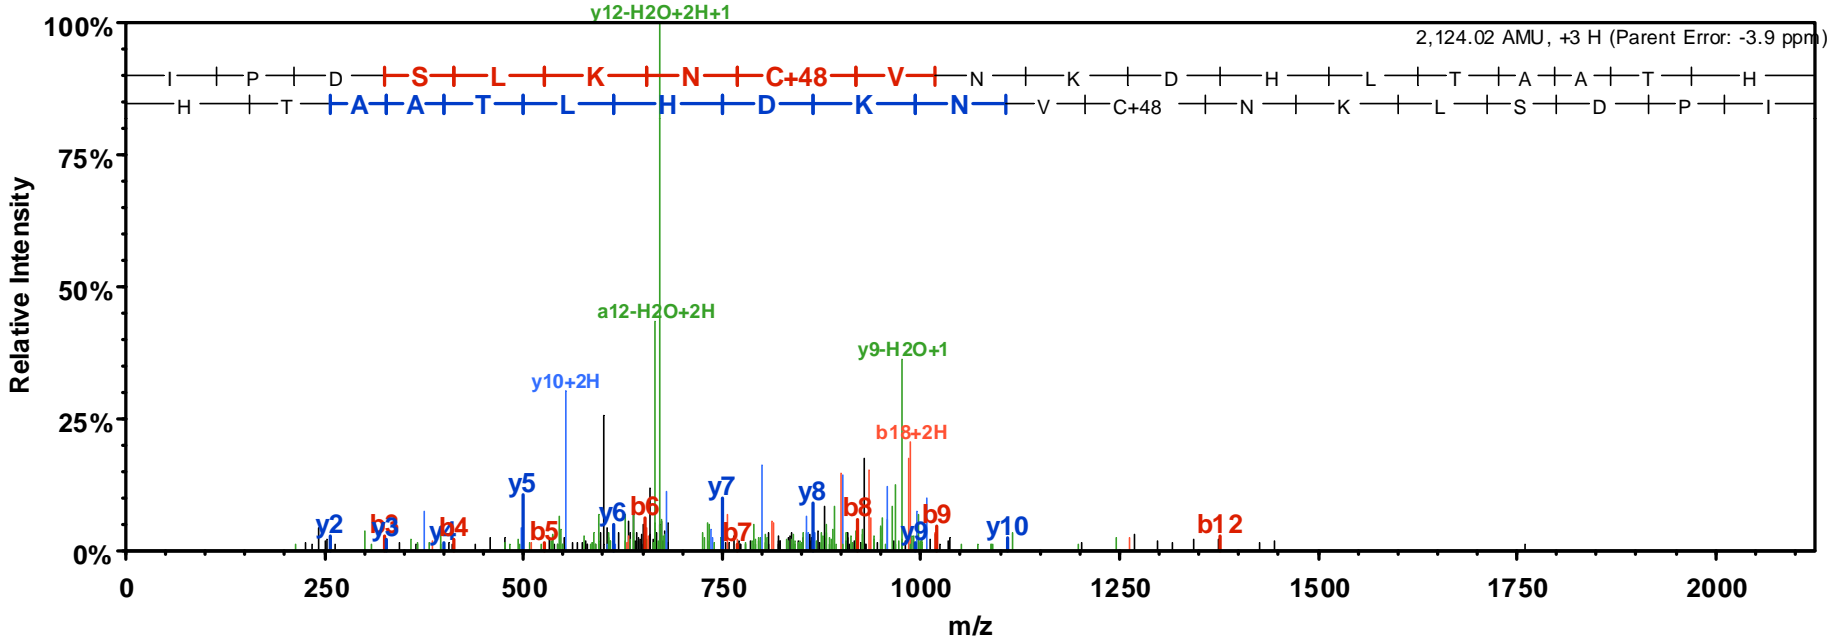



# Cystathionine beta-synthase C109EFFNAGGSVKDR

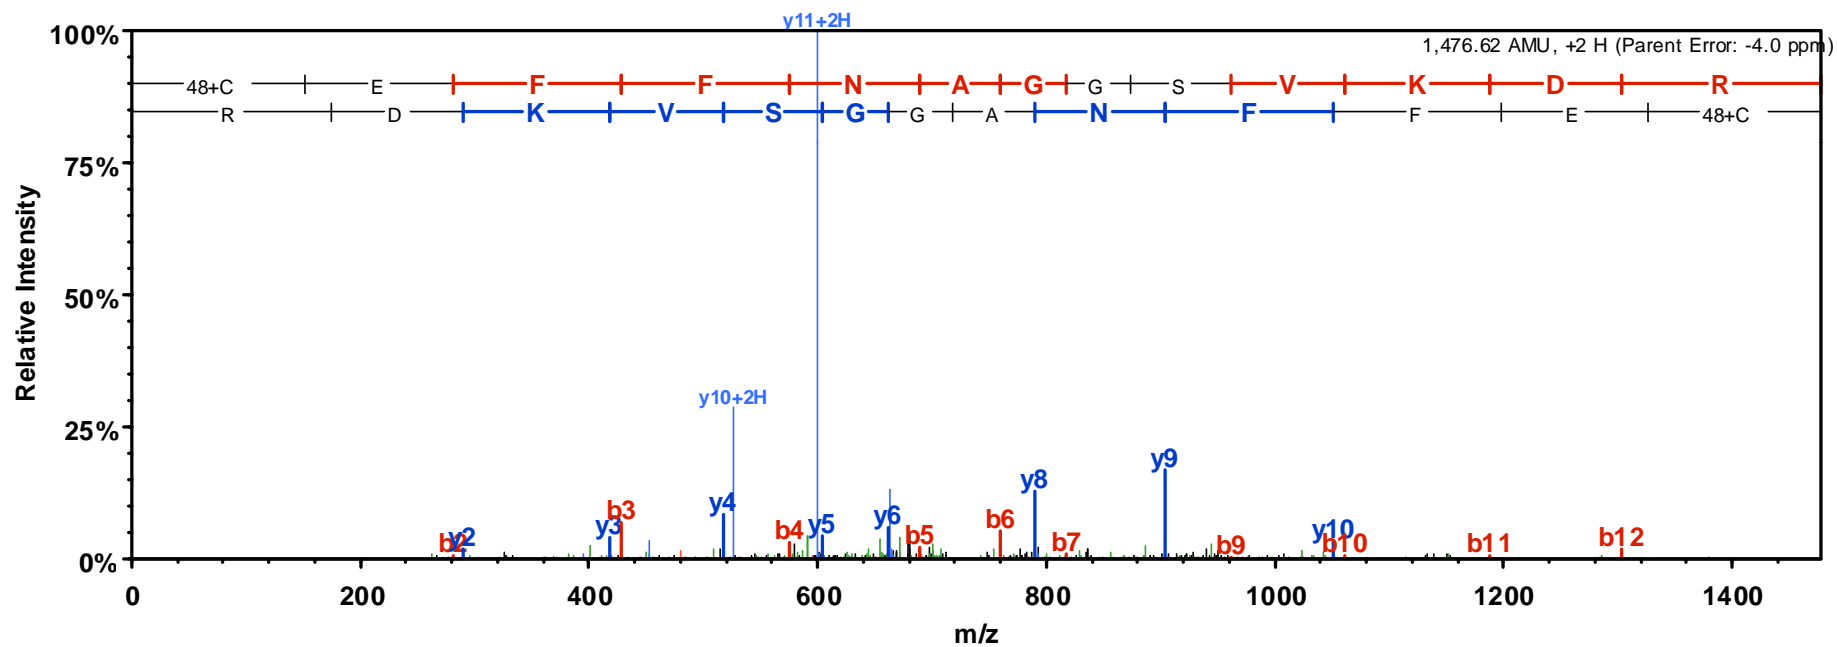

# Cytochrome P450 2C8 IC434AGEGLAR

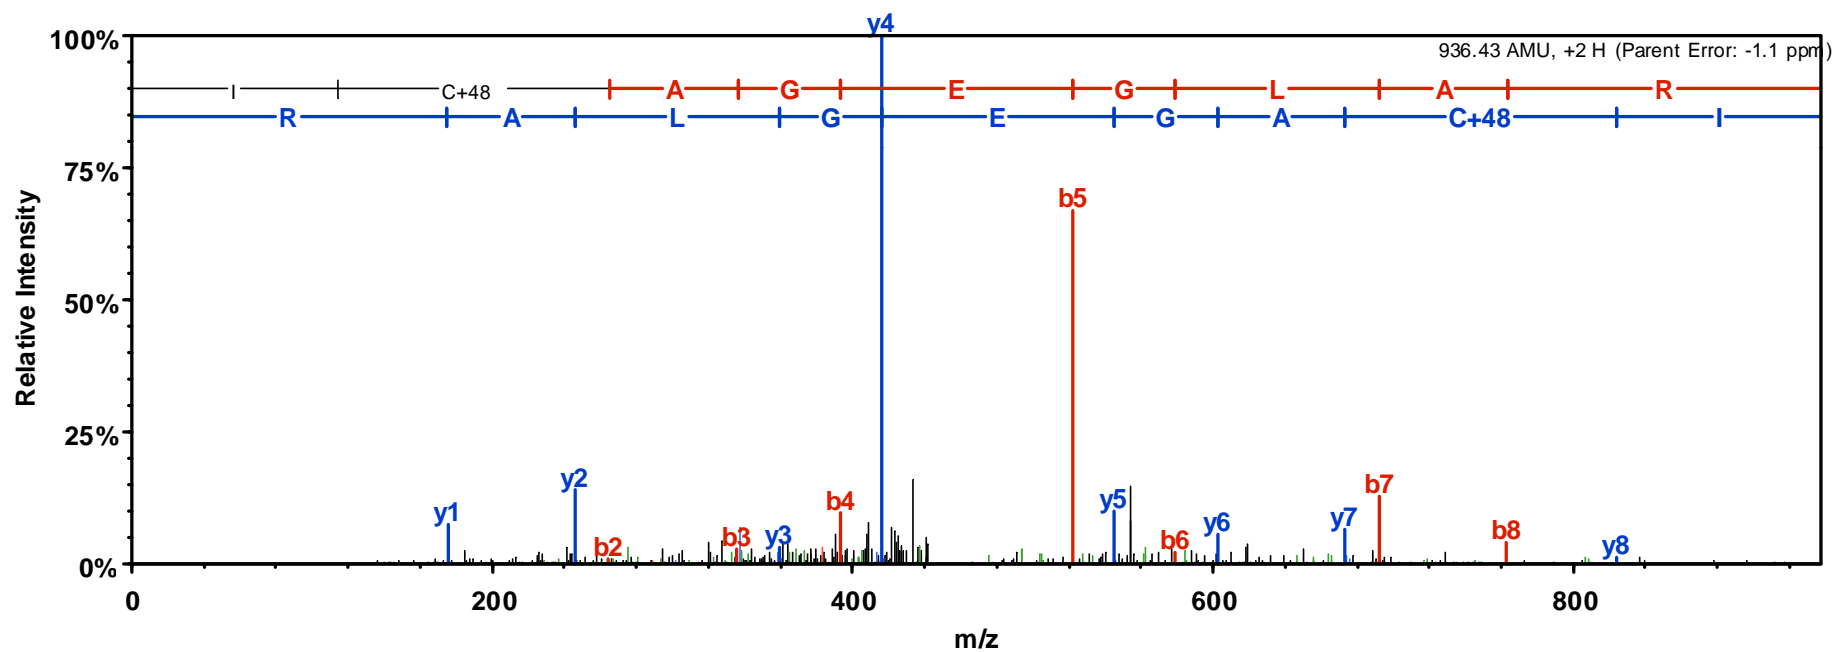

# DCN1-like protein 2

## DKVRQFMAC18TQAGE

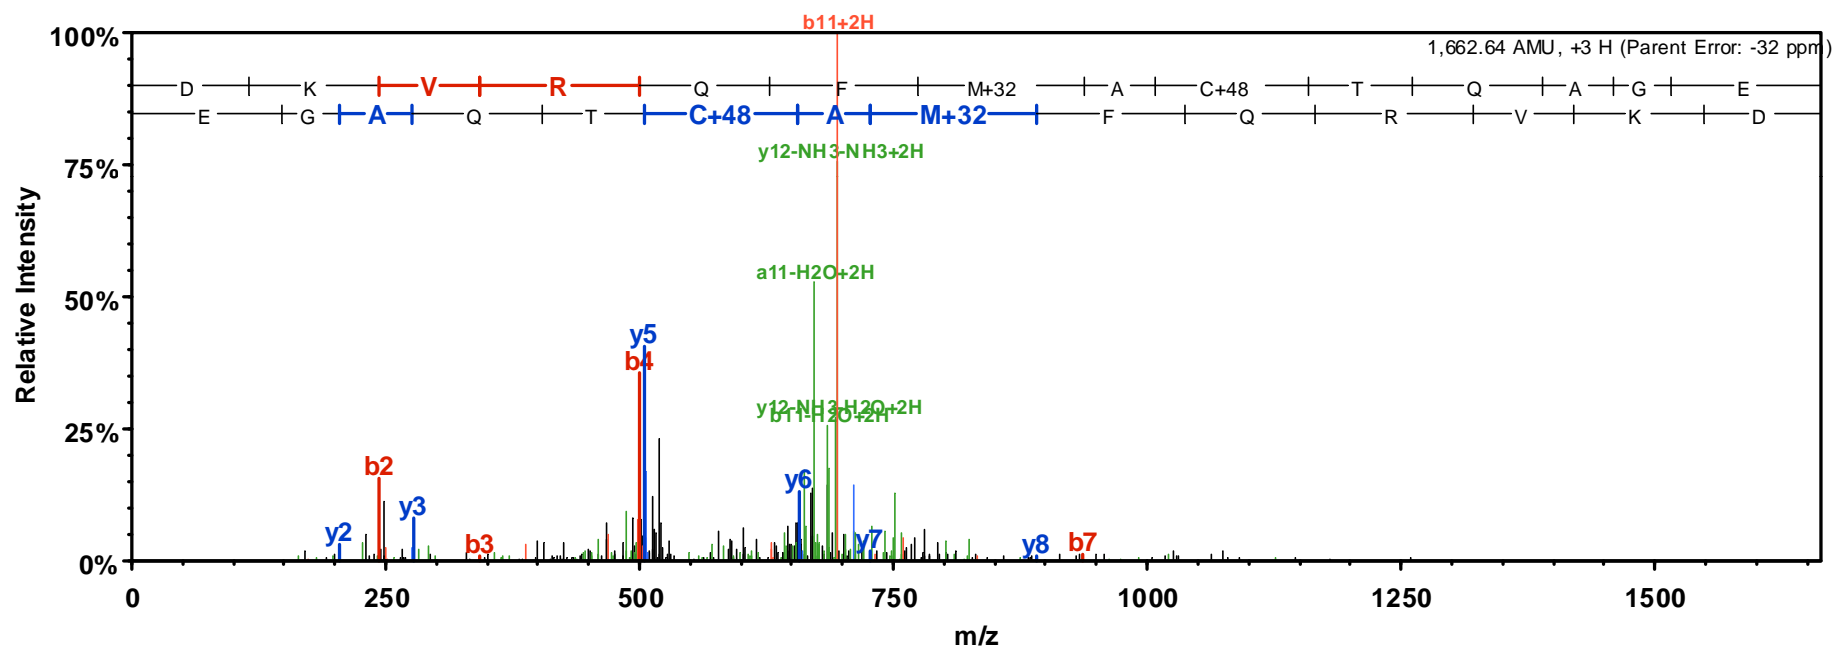

# Deoxyhypusine hydroxylase

NAGGEEAALALAEG LHC200GSALFR

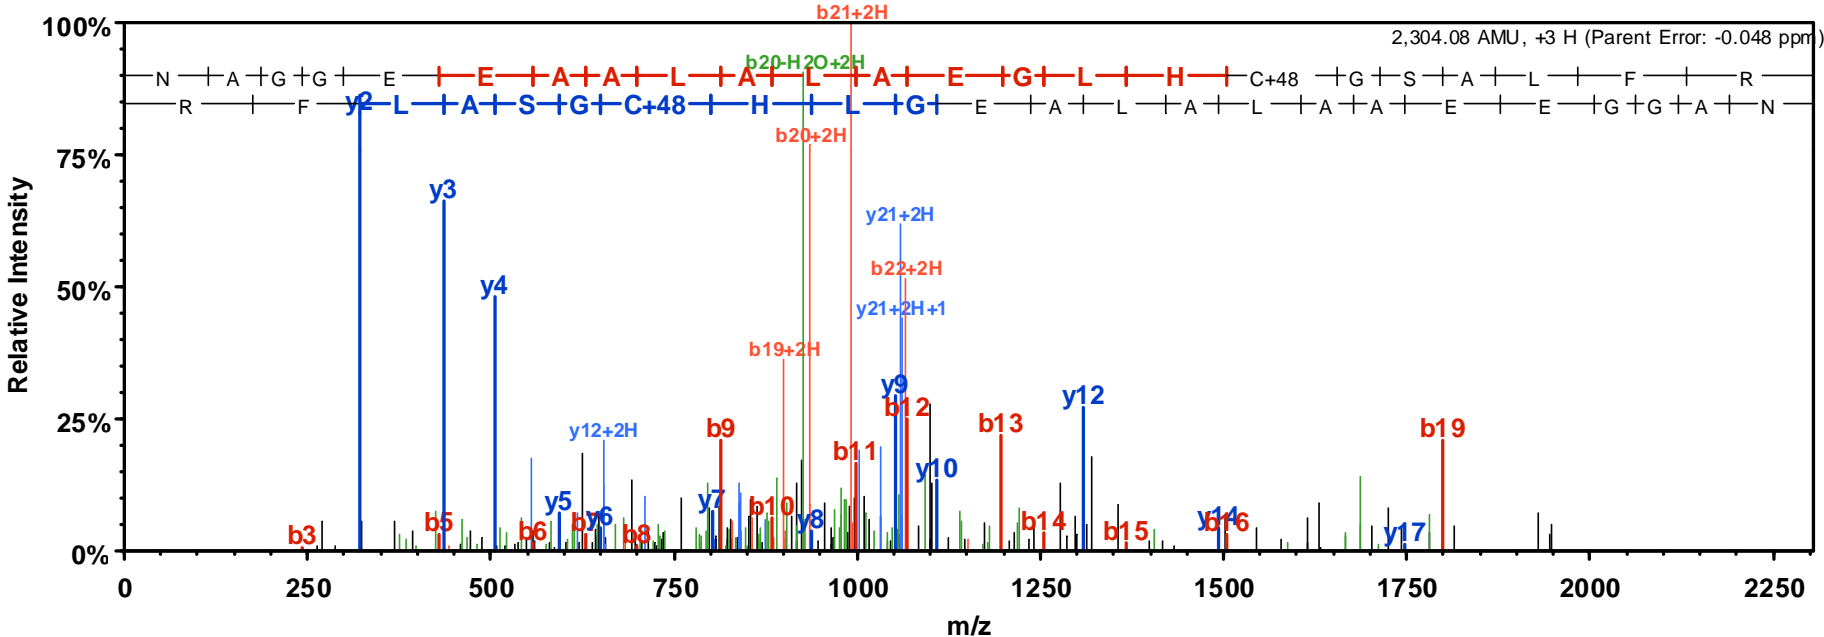

# Deoxyhypusine hydroxylase HEC242AEALGAIAR

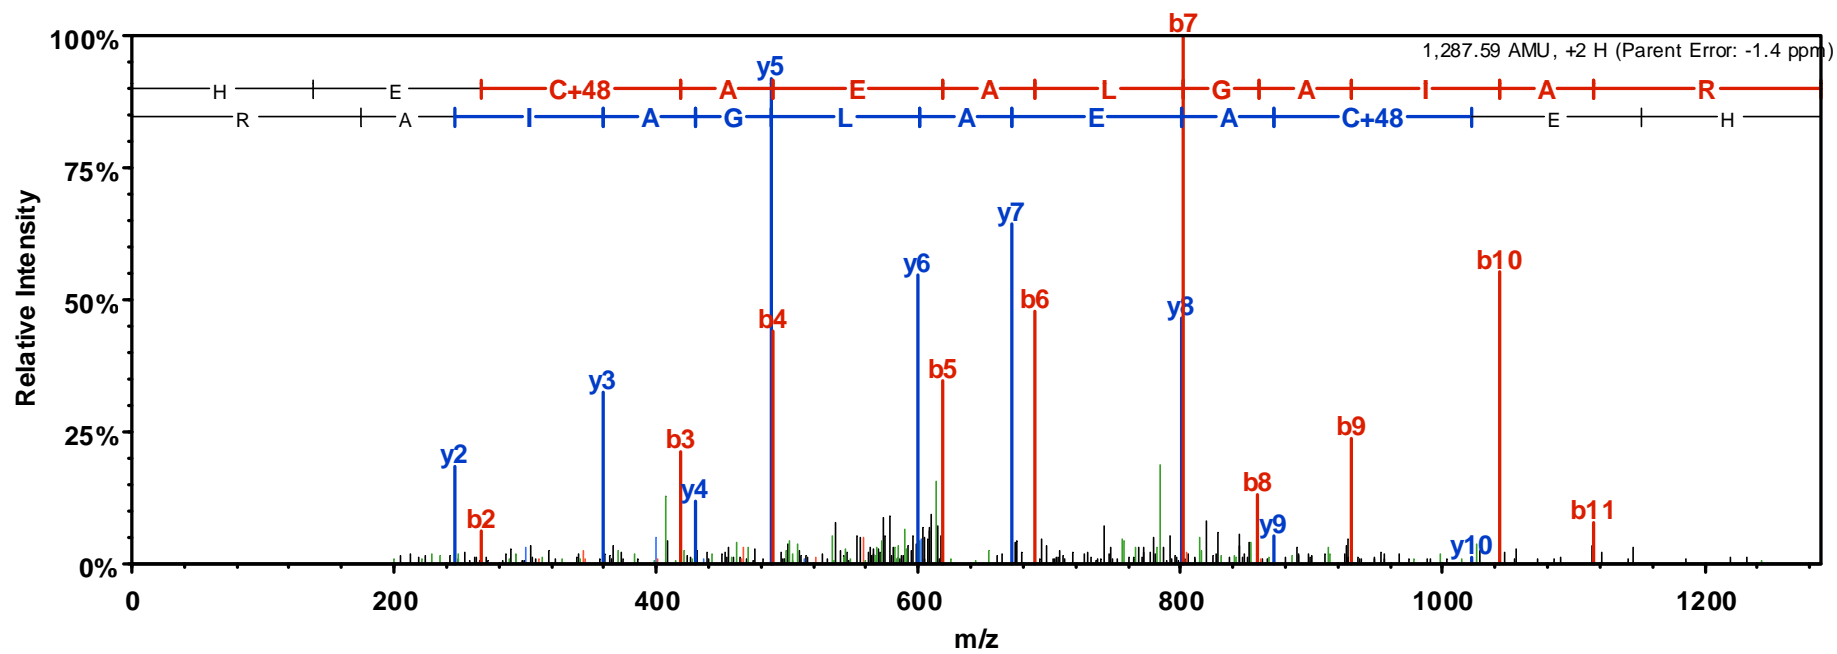

# Deoxyhypusine hydroxylase PAC254LAALQAHADDPER

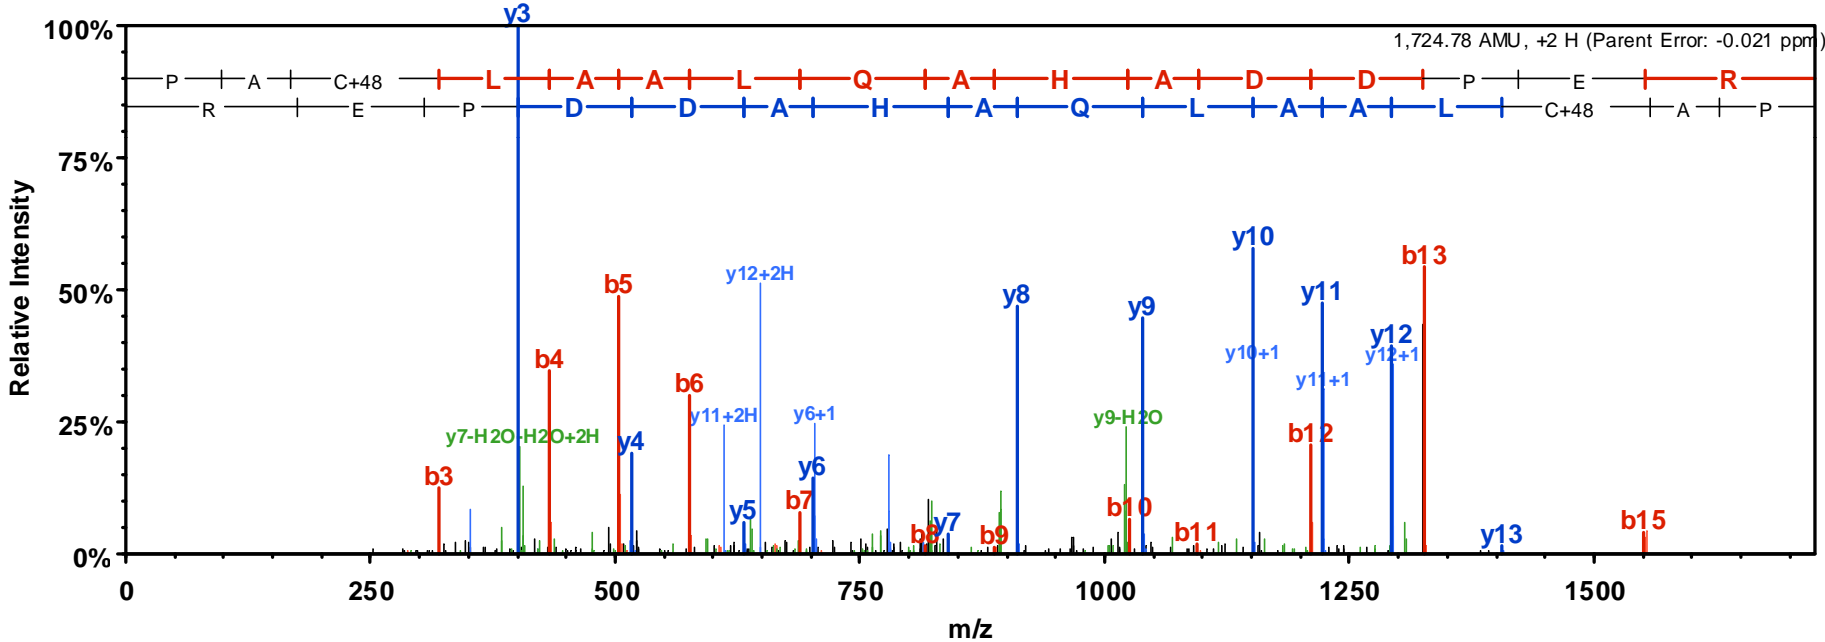

# Deoxyhypusine hydroxylase ESC273EVALDMYEHETGR

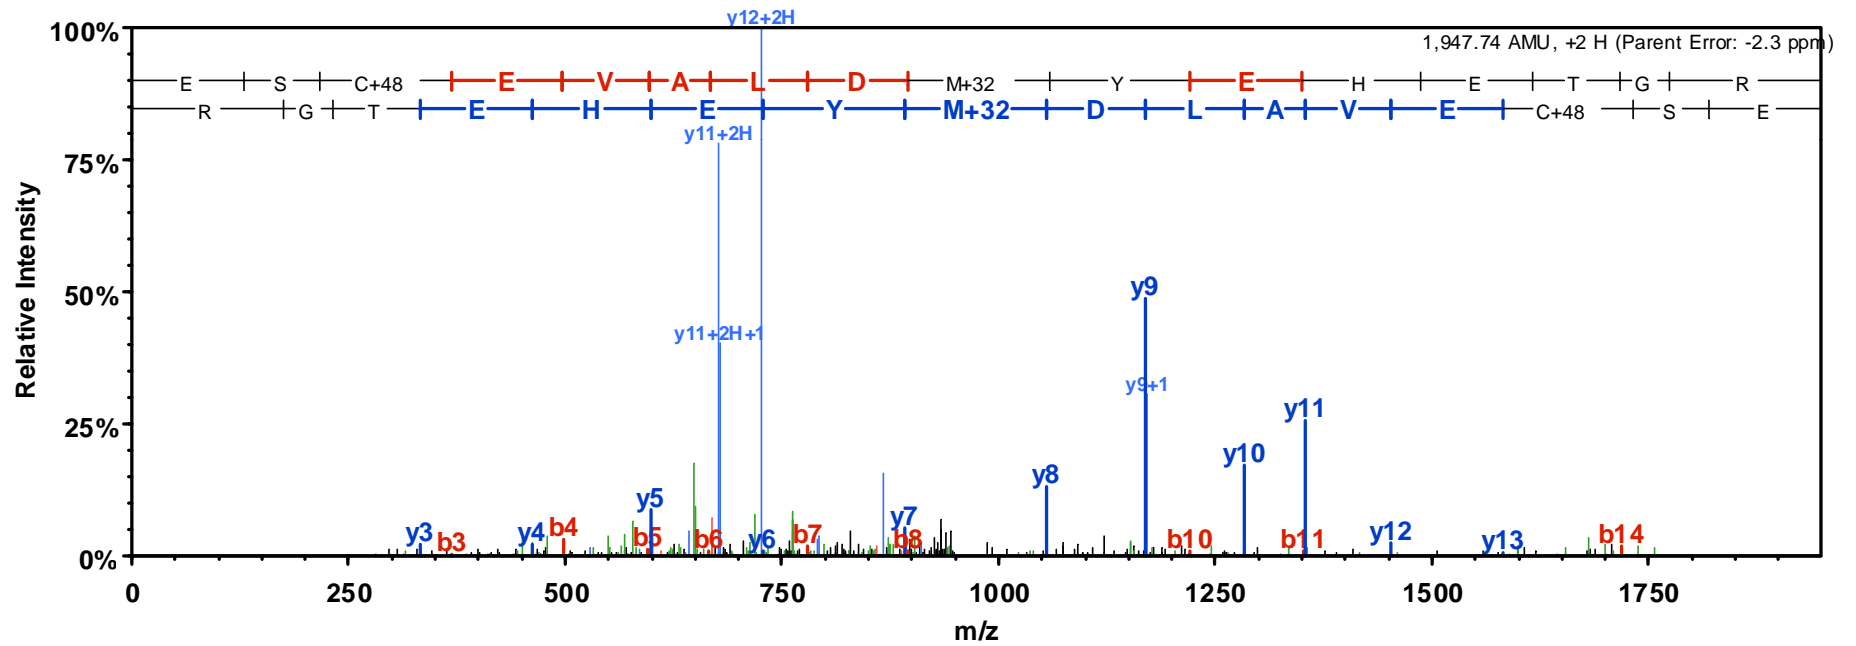

DNA replication licensing factor MCM7  
C482SILAAANPAYGR



# DNA topoisomerase 2-alpha NSTEC455T

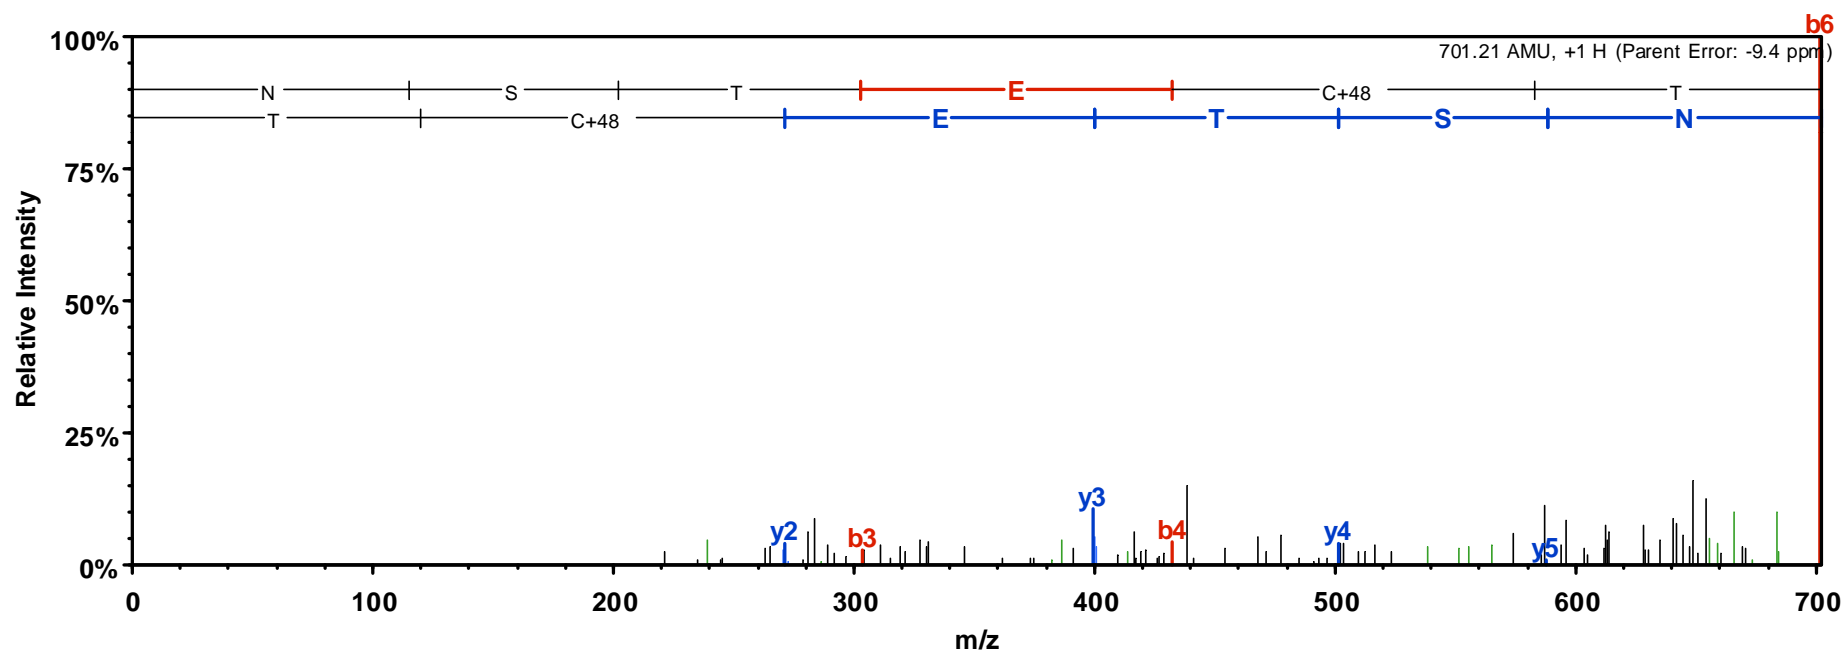

# DnaJ homolog subfamily B member 2

## SPSPEEKASRC321LIL

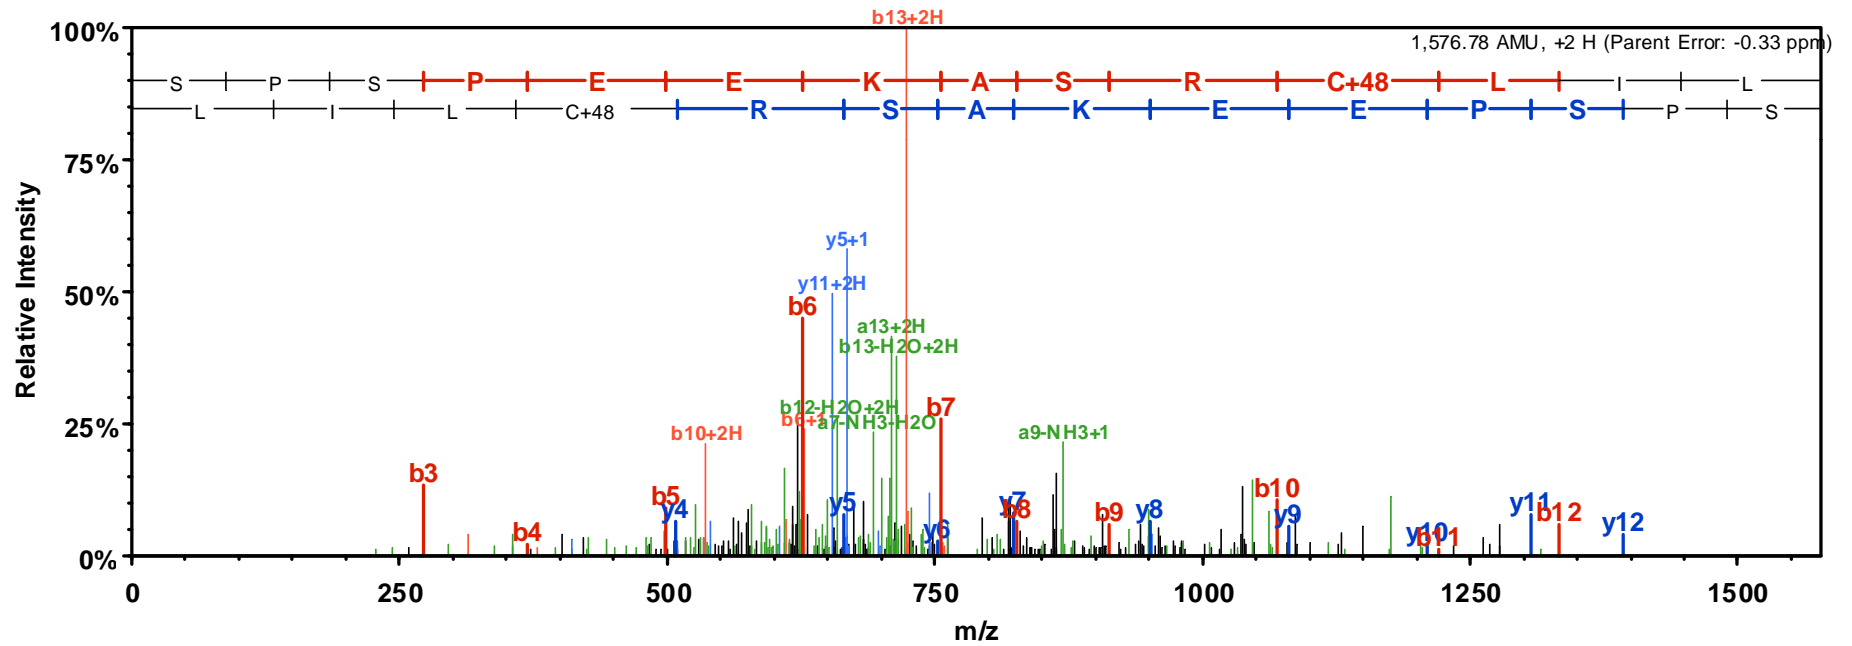

# Dual specificity tyrosine-phosphorylation-regulated kinase 2 (DYRK) IIHC347DLKPENILLK

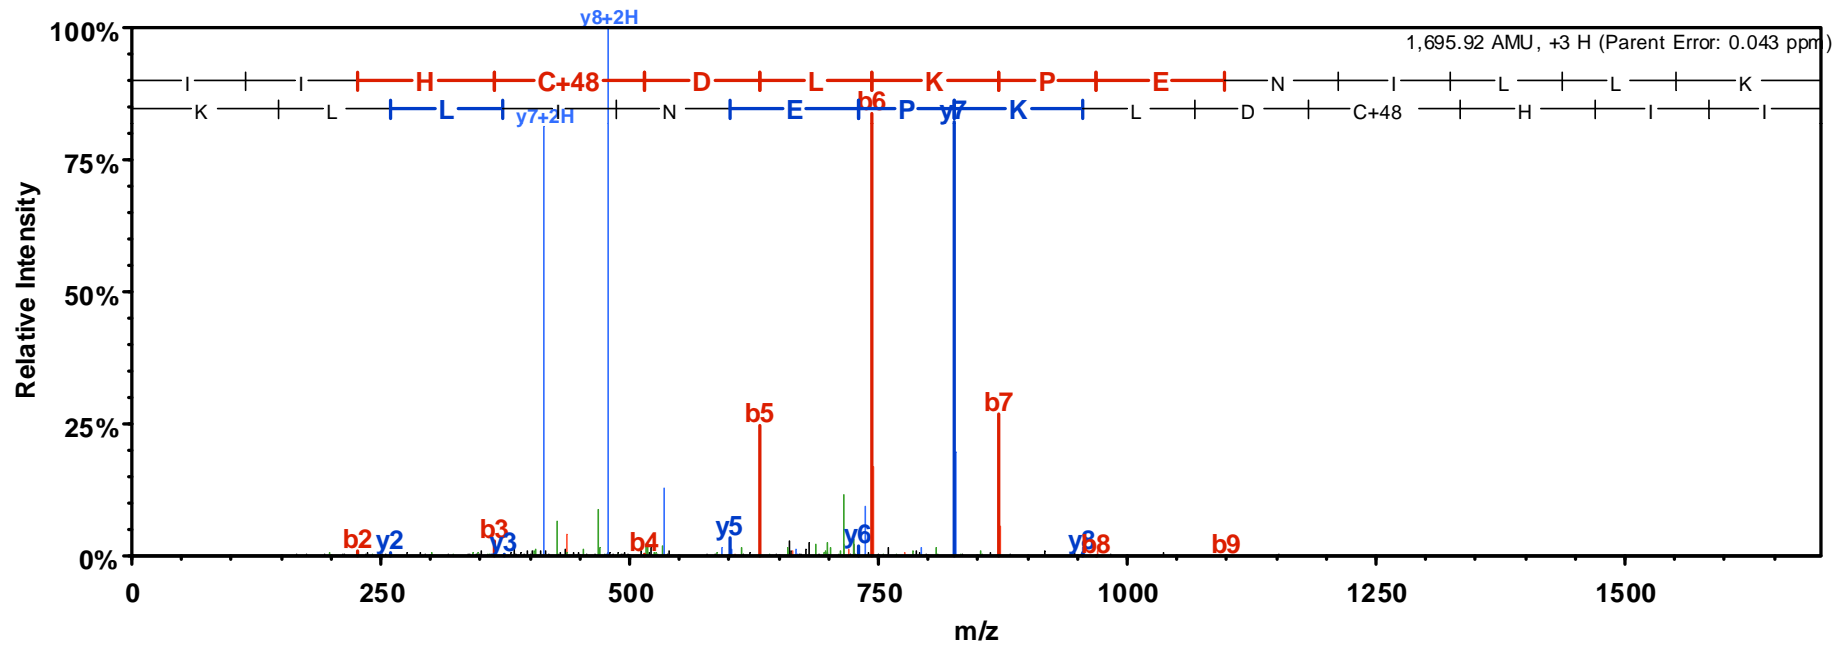

# Dual specificity tyrosine-phosphorylation-regulated kinase 2 (DYRK) VIDFGSSC373YEHQR

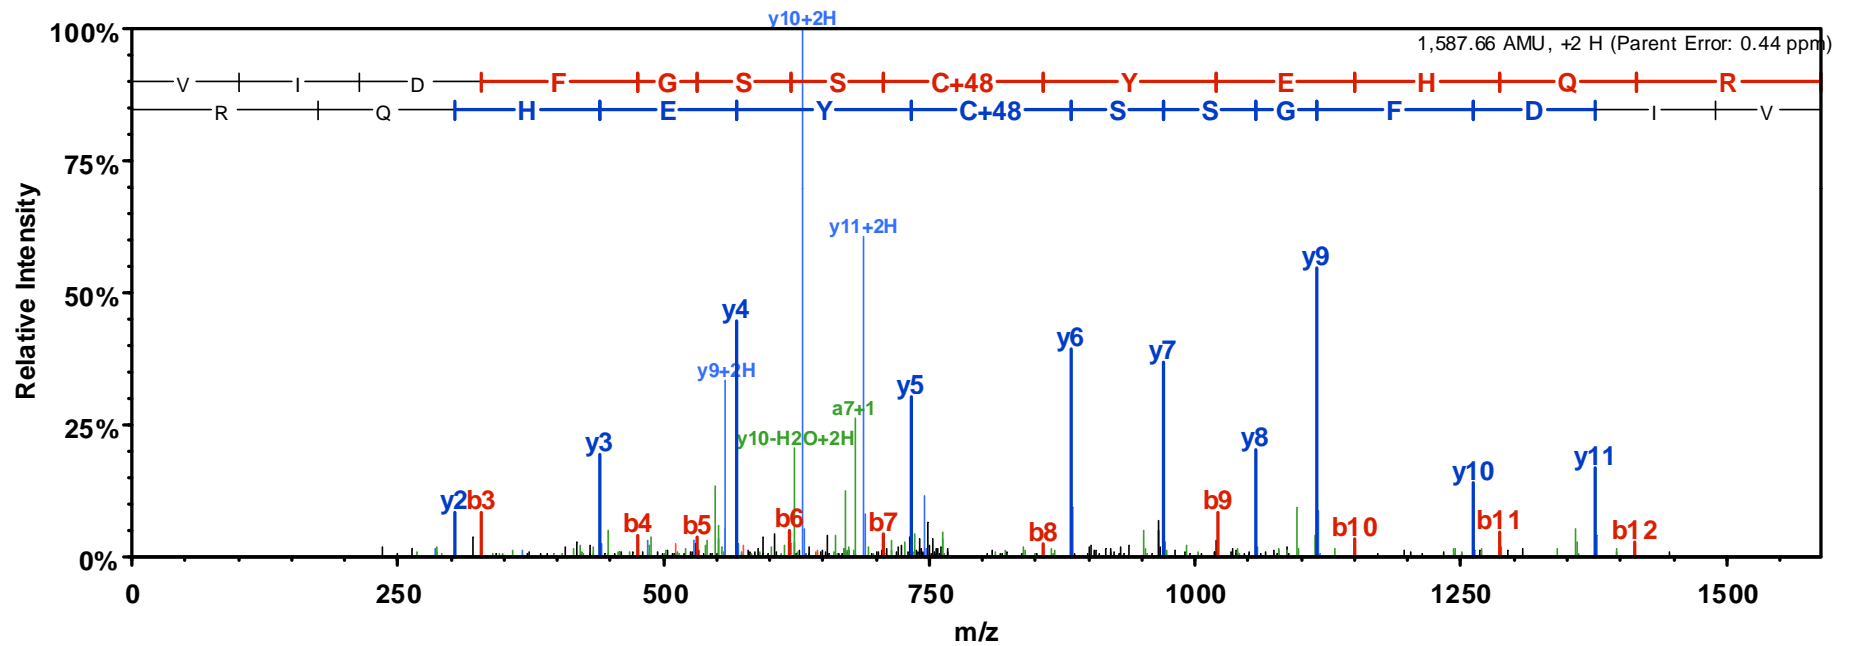

# E3 ubiquitin-protein ligase NRDP1 LDNLMSHLSDC106EHNPK

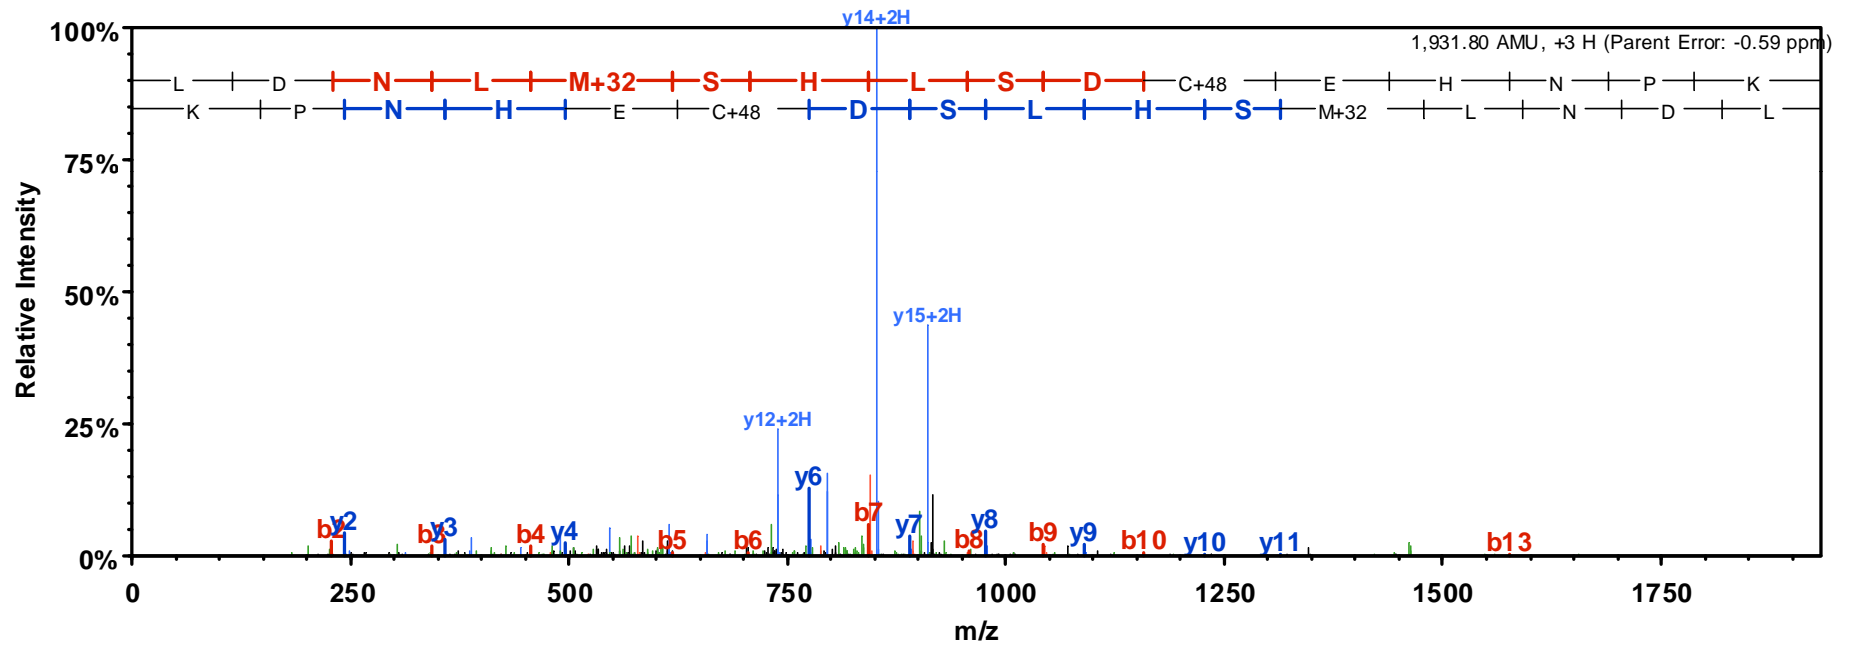

E3 ubiquitin-protein ligase NRDP1  
DELPNHNC134IKHLR

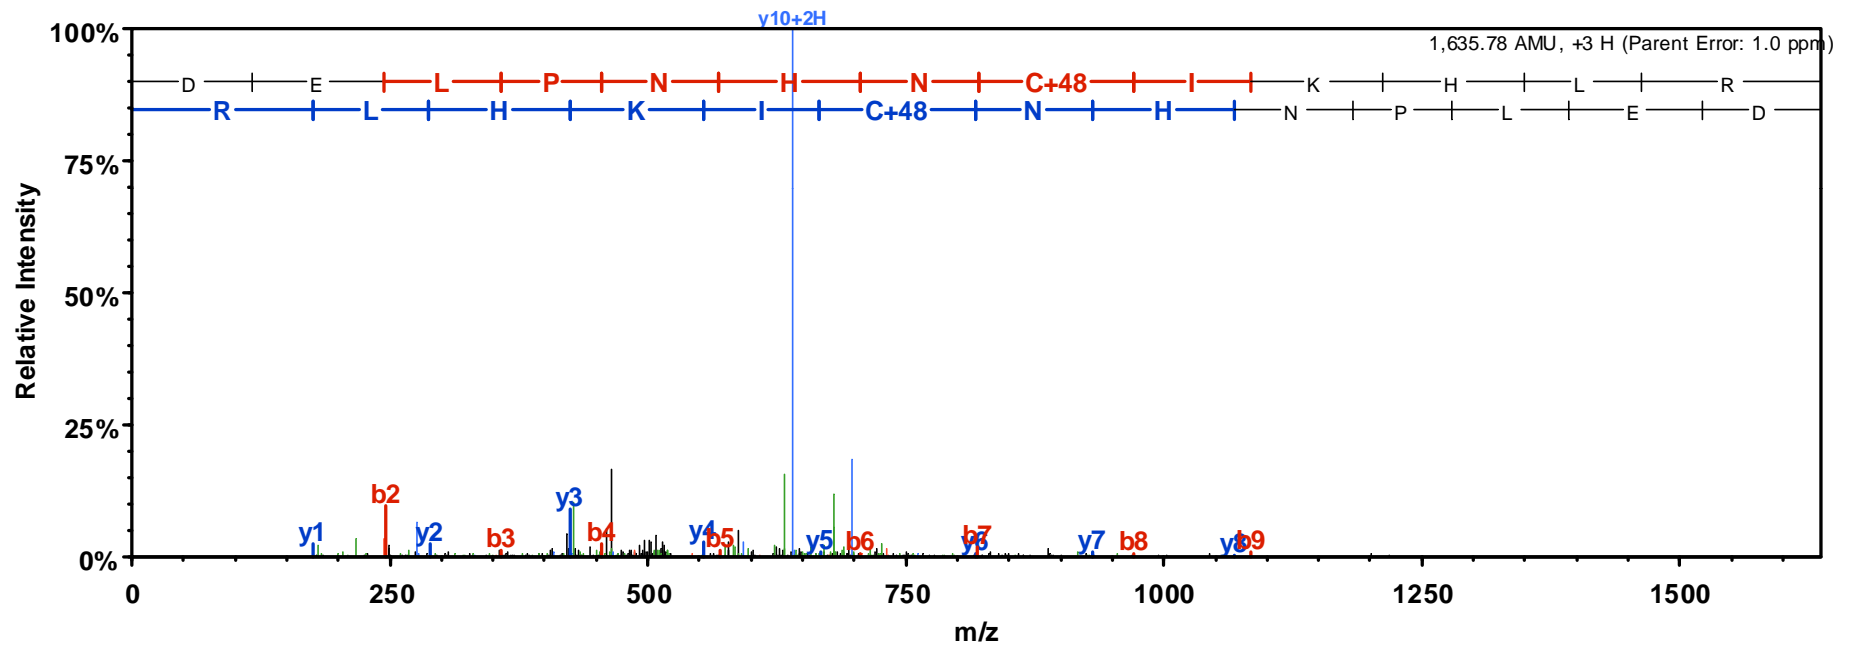

# E3 ubiquitin-protein ligase NRDP1 SLVESGC238PASIVNELIENAHER

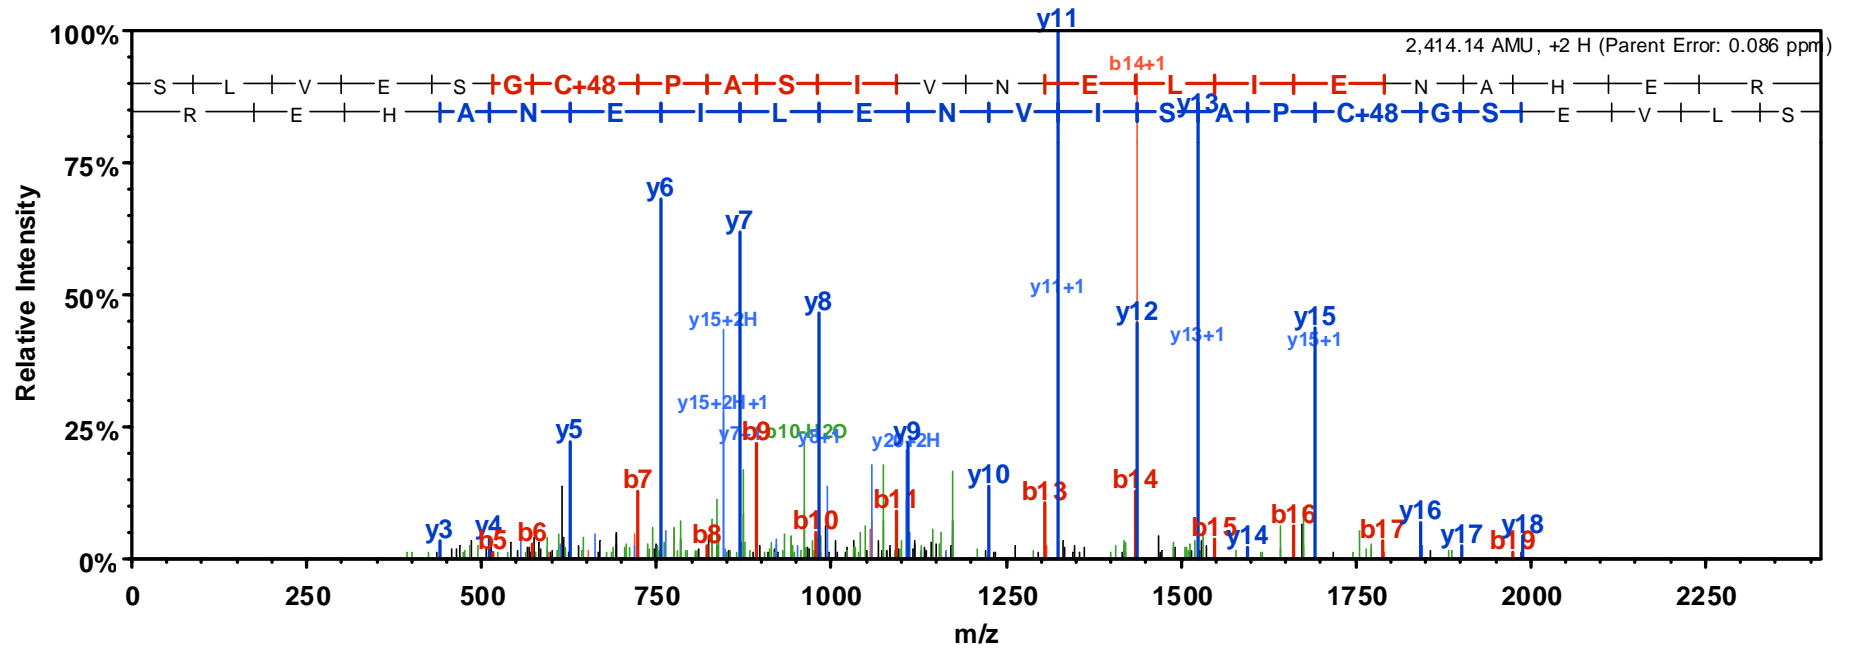

# Eukaryotic initiation factor 4A-II

AIIPC67IKGYDVIAQAQSGTGK

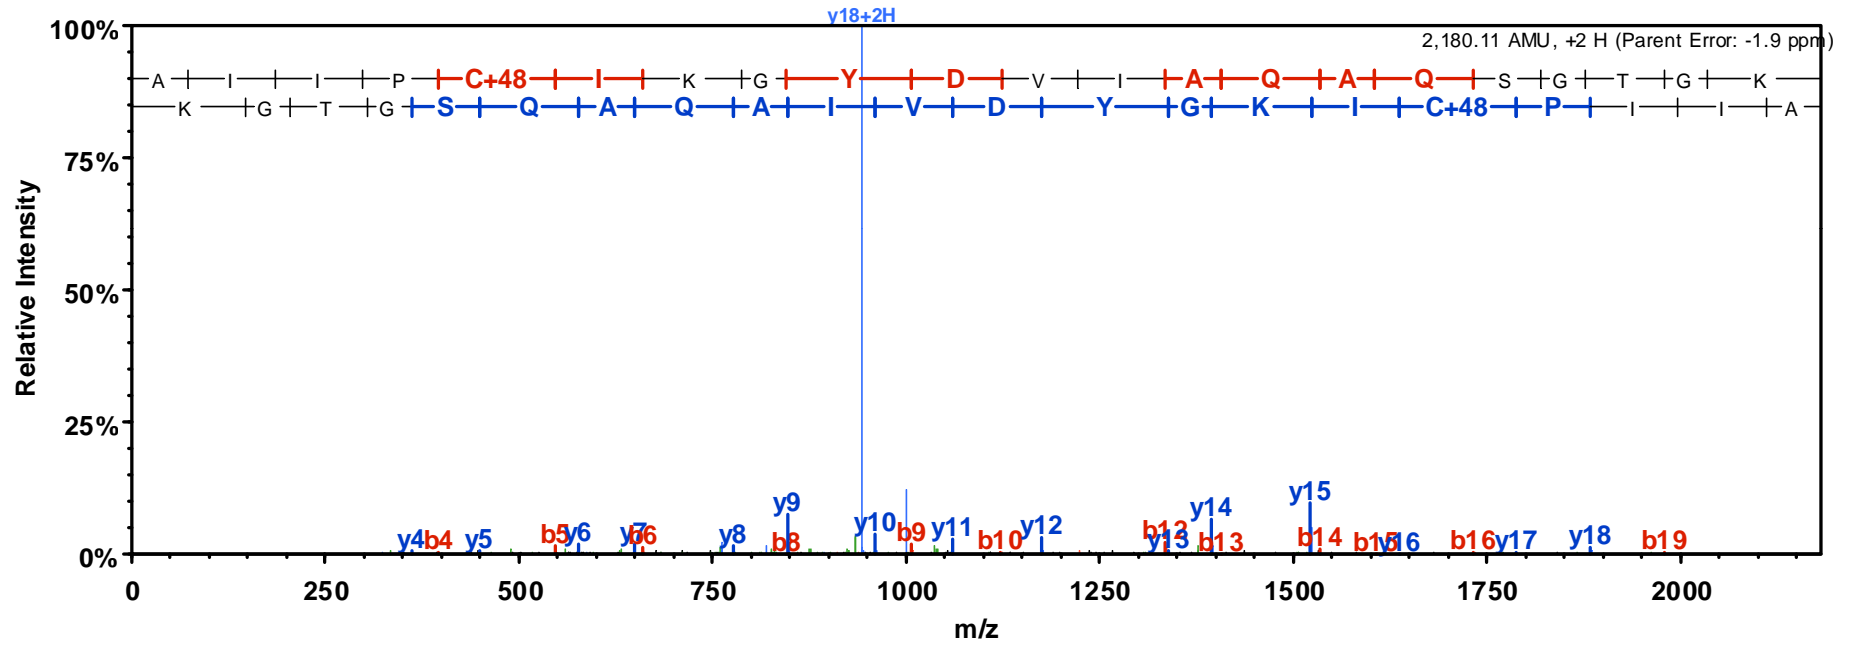



Eukaryotic translation initiation factor 4E-binding protein 1  
FLMEC62RNSPVTK

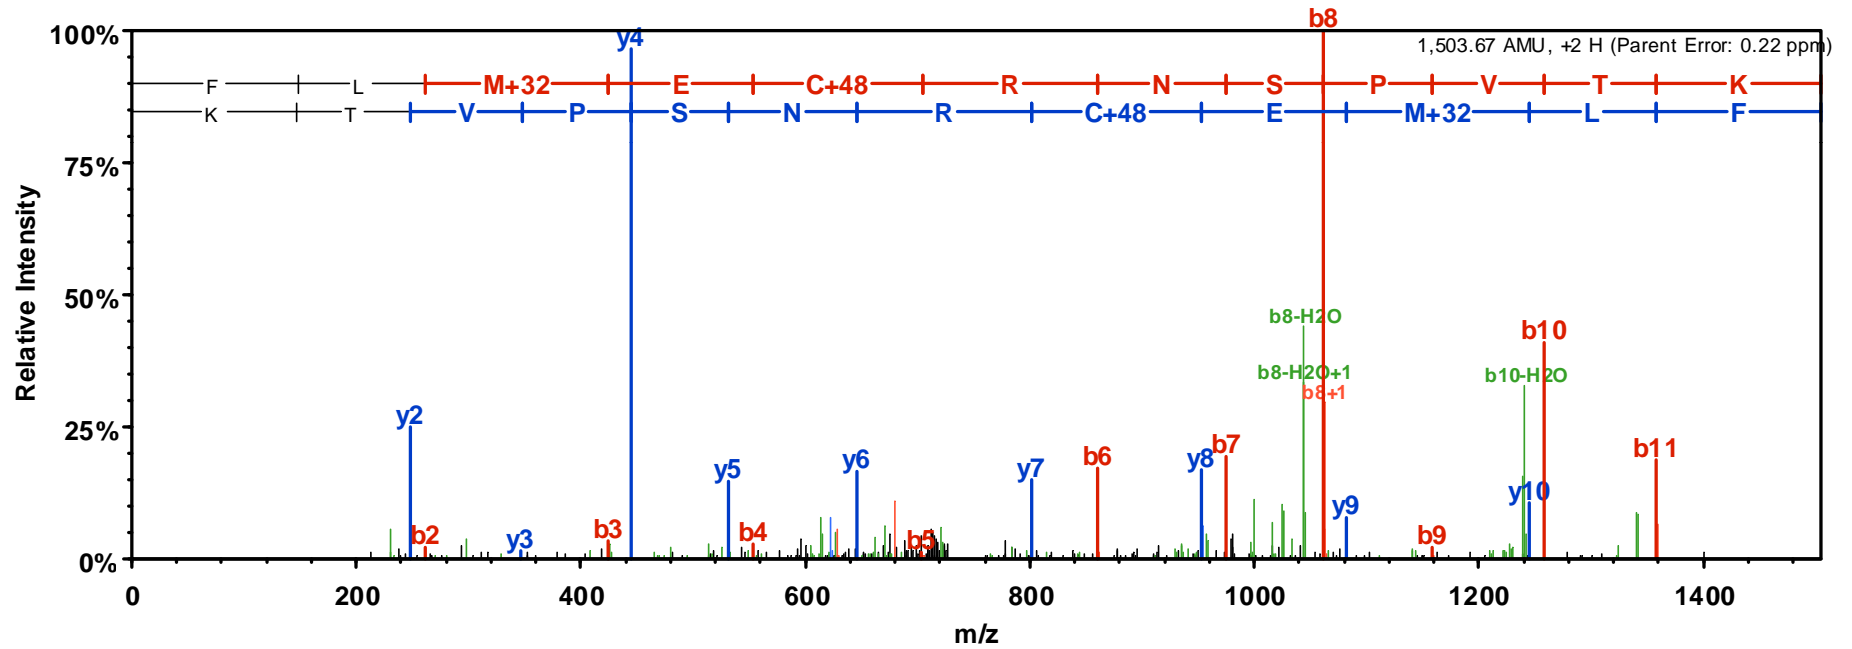

# Glutamate dehydrogenase 1, mitochondrial IHKPC112NHVLSLSFPIR

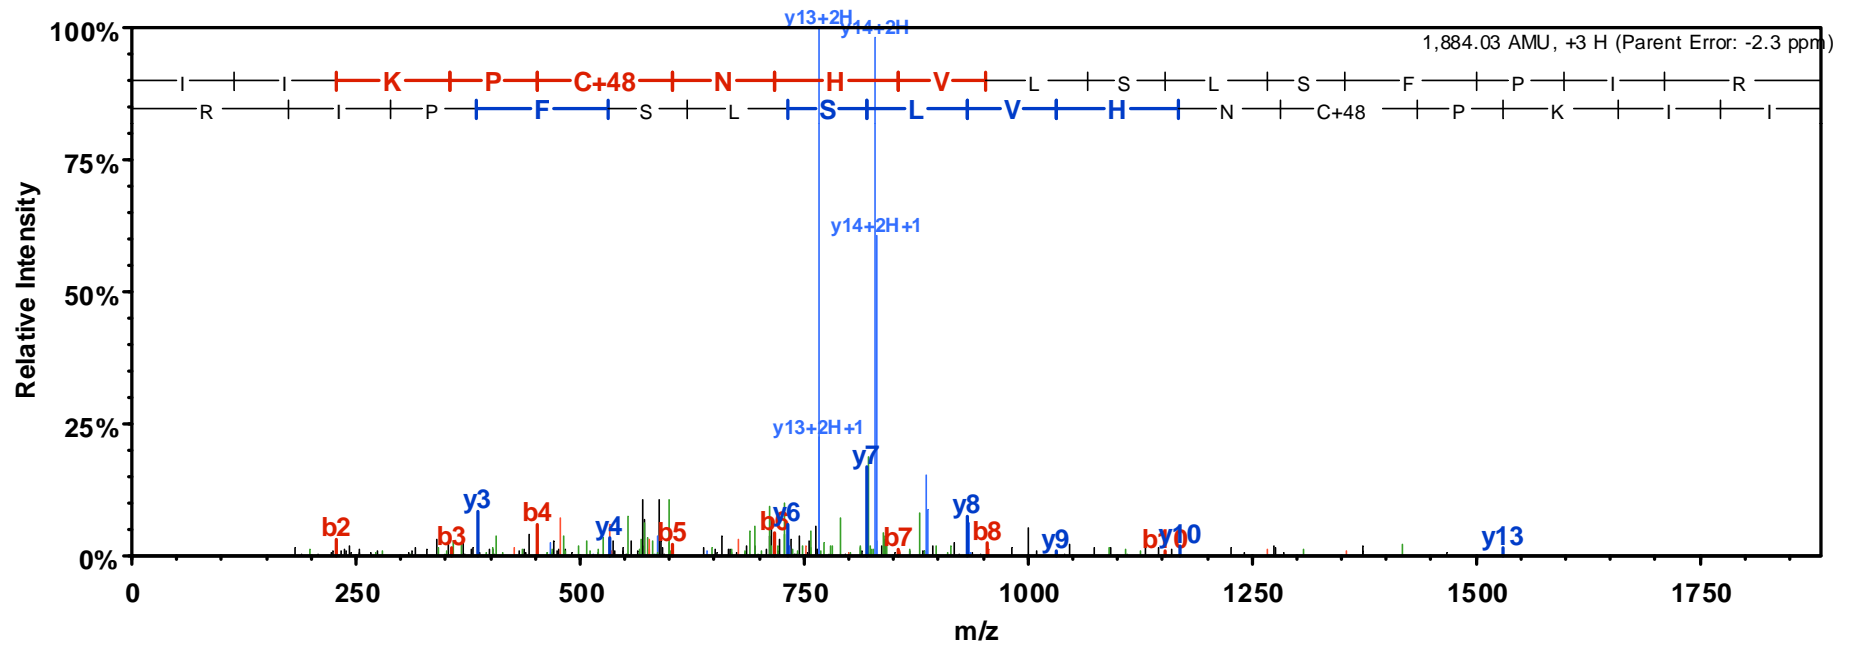

Glutaminase liver isoform, mitochondrial  
C136VSSNIVLLTQAFR

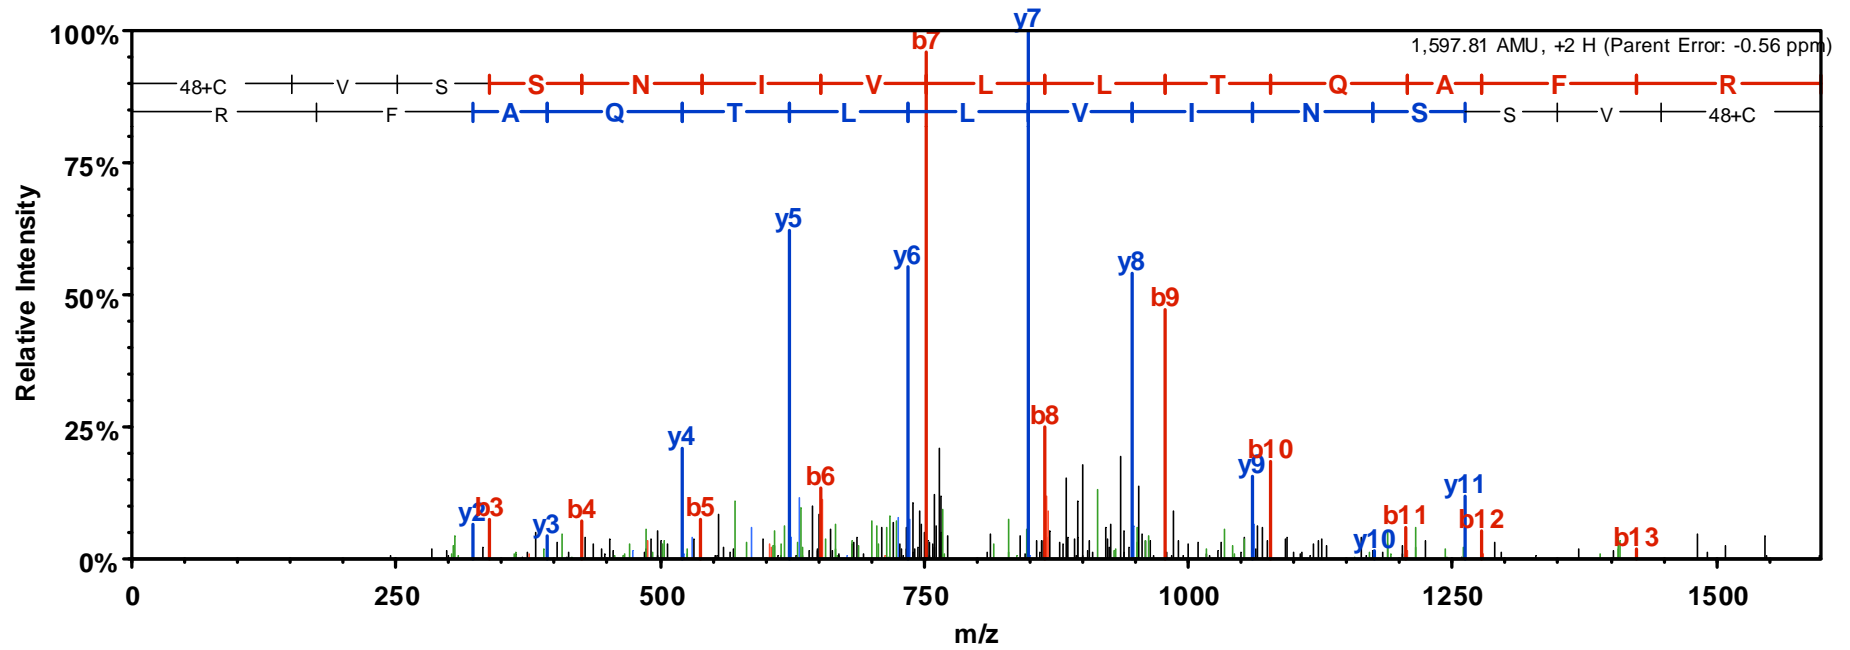

# Glutamine synthetase AC183LYAGVK

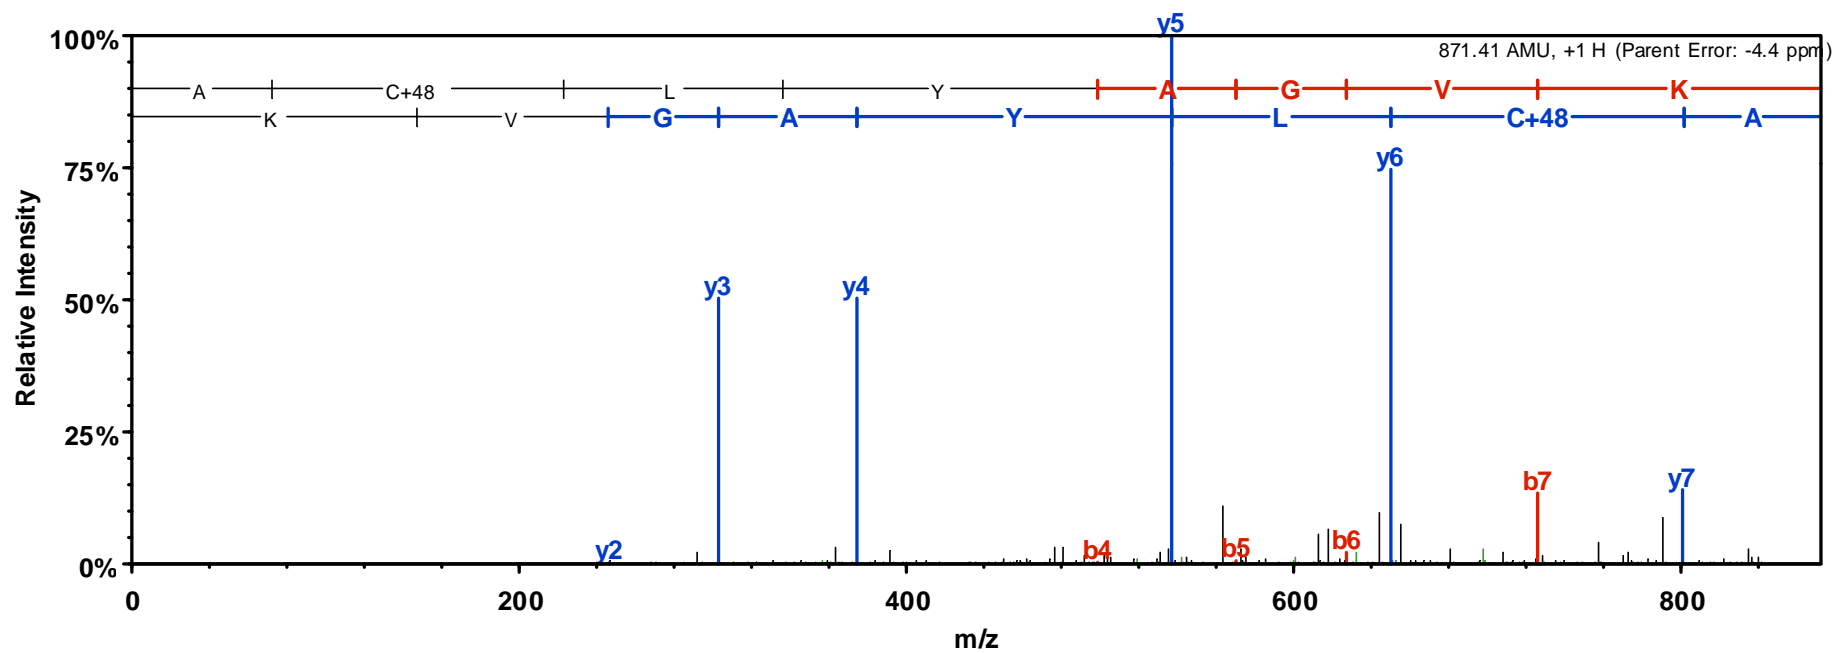

# Glutamine synthetase TC359LLNETGDEPFQYKN

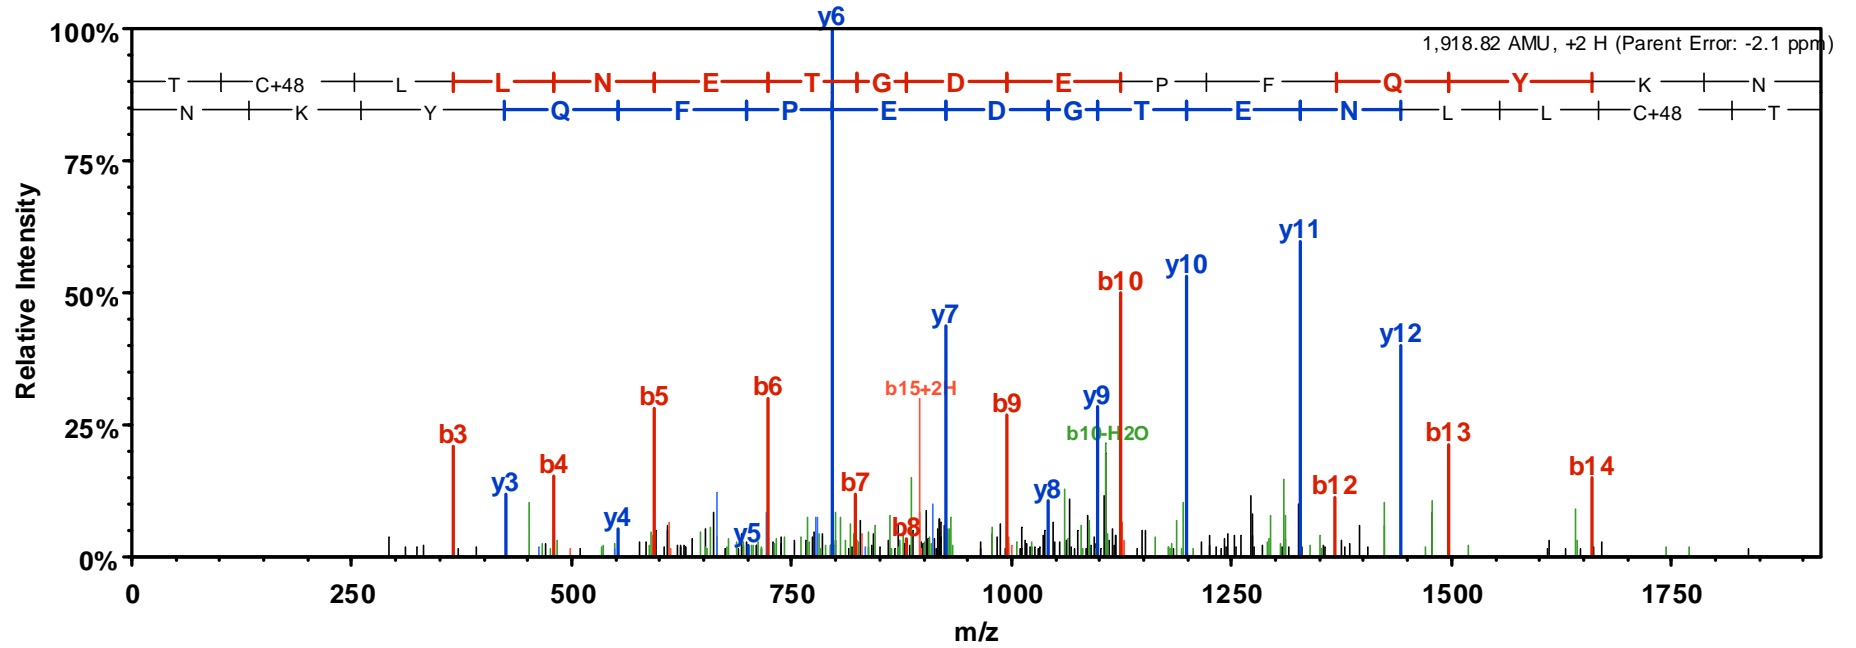

# Glutaredoxin-3 LTHAAPC146MLFMK

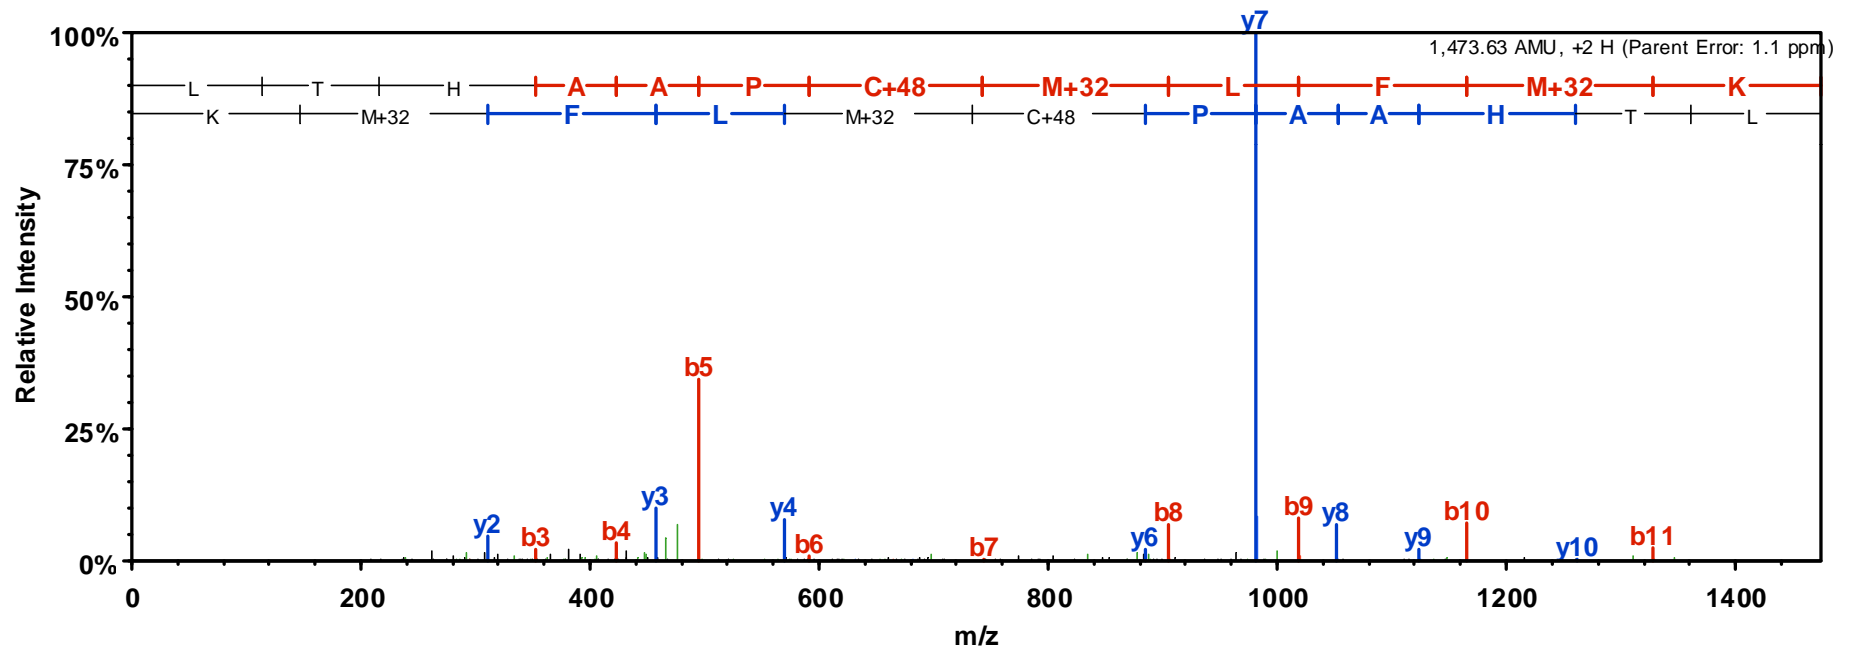

Glycine dehydrogenase [decarboxylating], mitochondrial  
C225HPQTIAVVVQTR

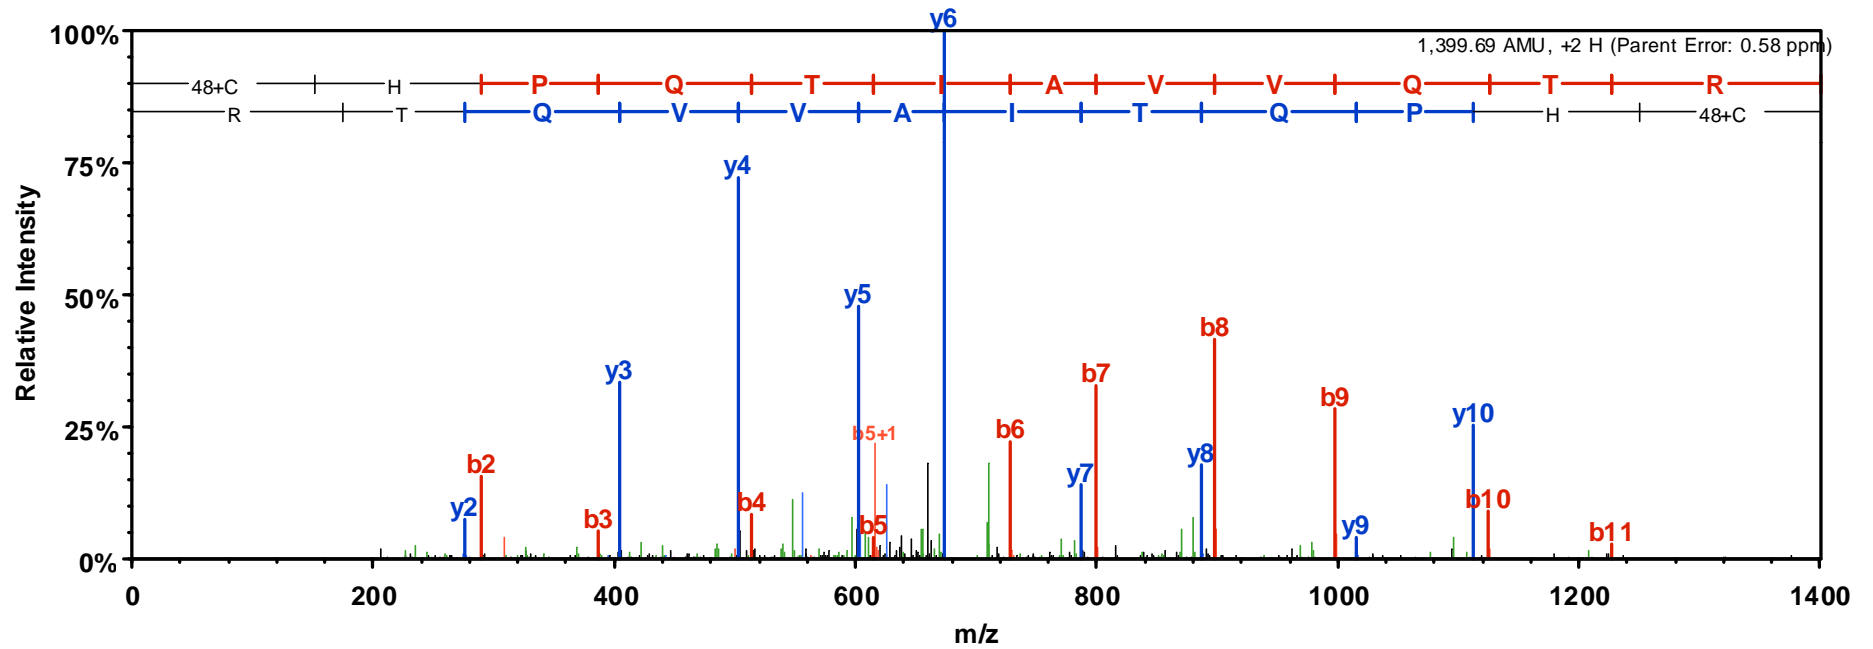

# Glyoxalase domain-containing protein 4 ALLGYADNQC197K

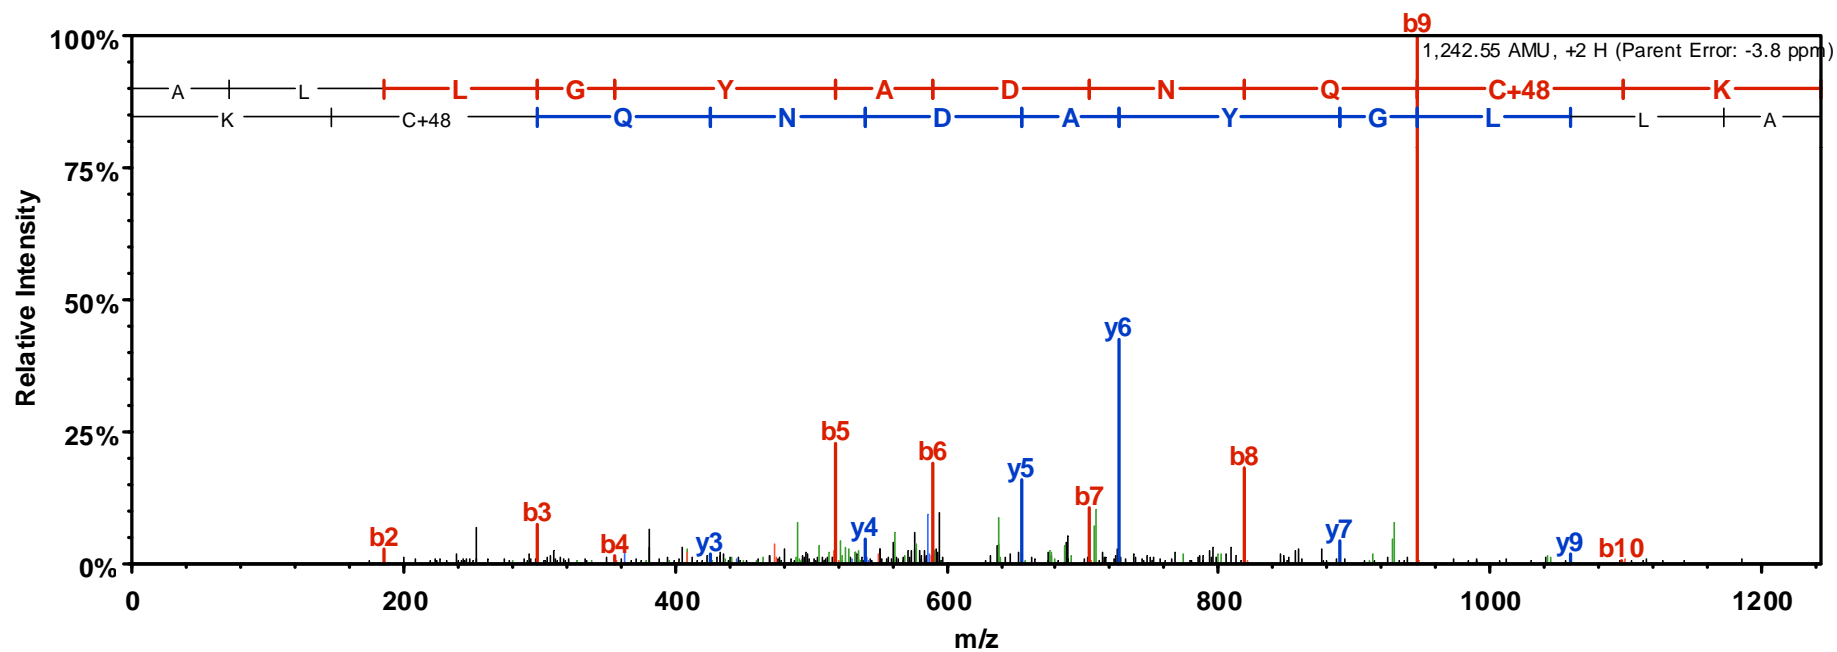



# Glyoxalase domain-containing protein 4

## IAFSC221PQKELPDLEDLMK

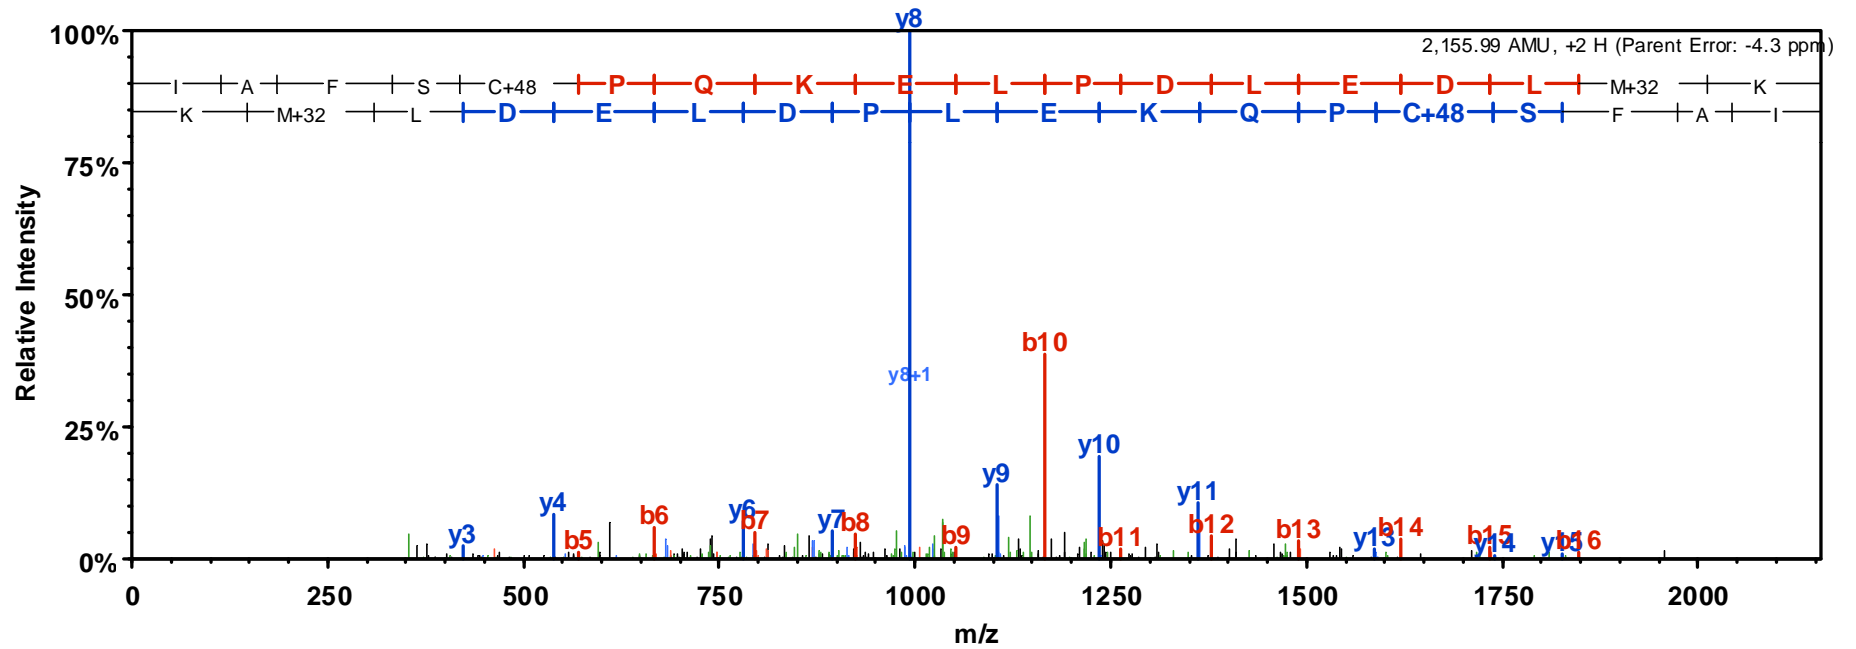

# GTPase HRas TGEGFLC80VFAINNTK

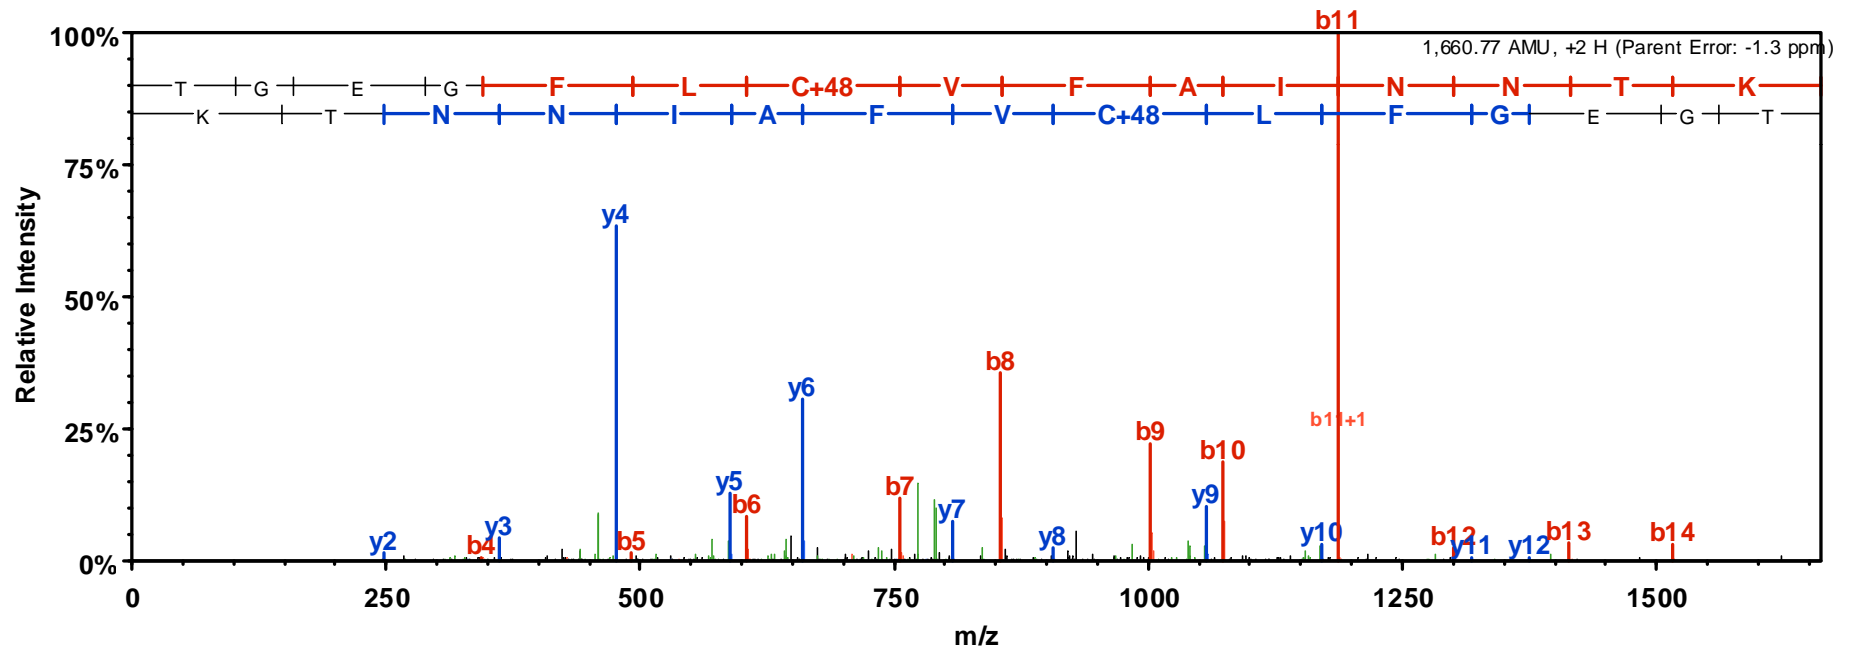

# GTPase HRas VLVGNKC118DLAAR

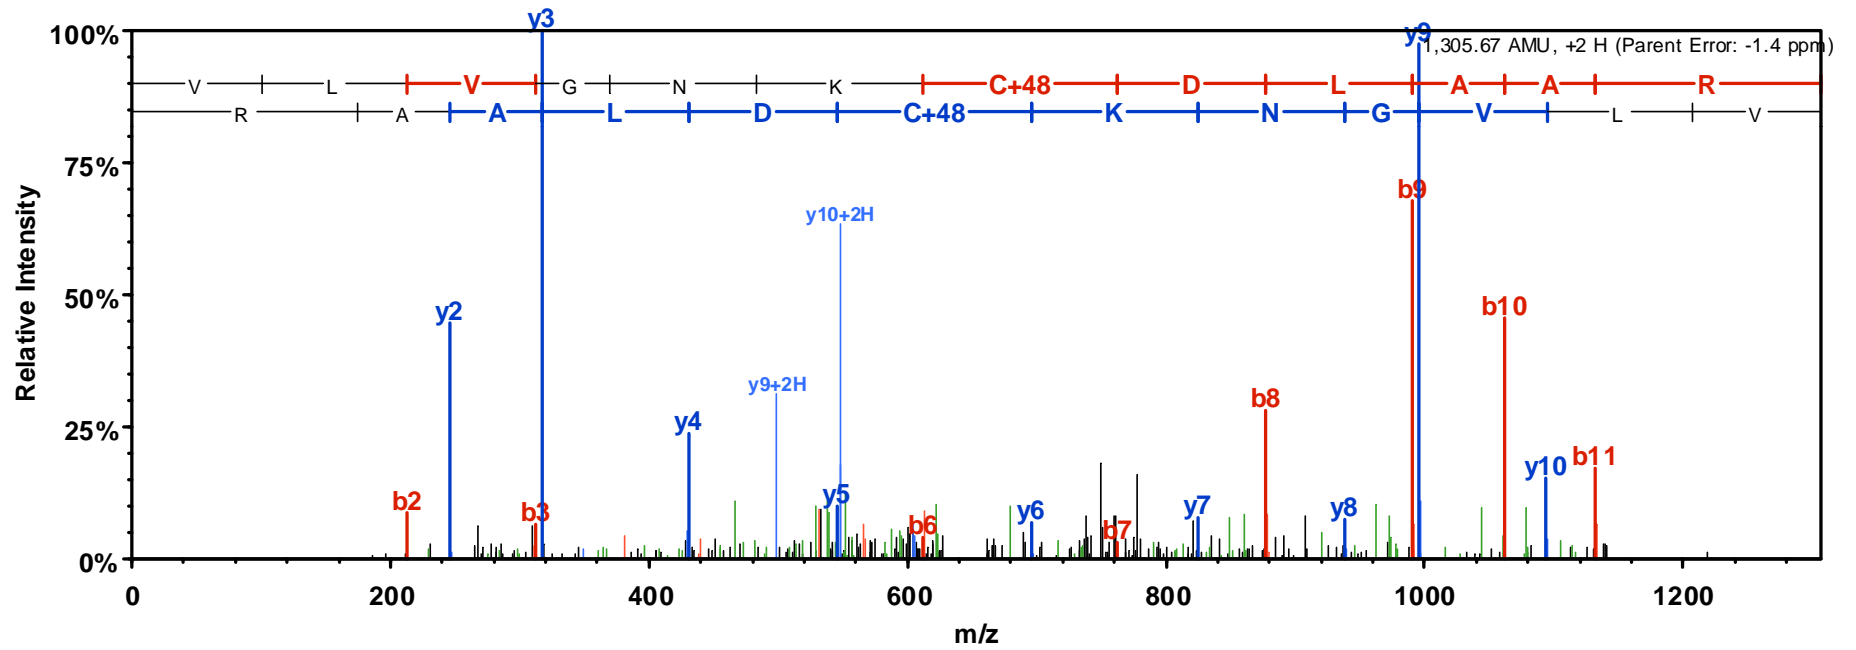

# GTPase HRas LRKLNPPDESGPGC181M

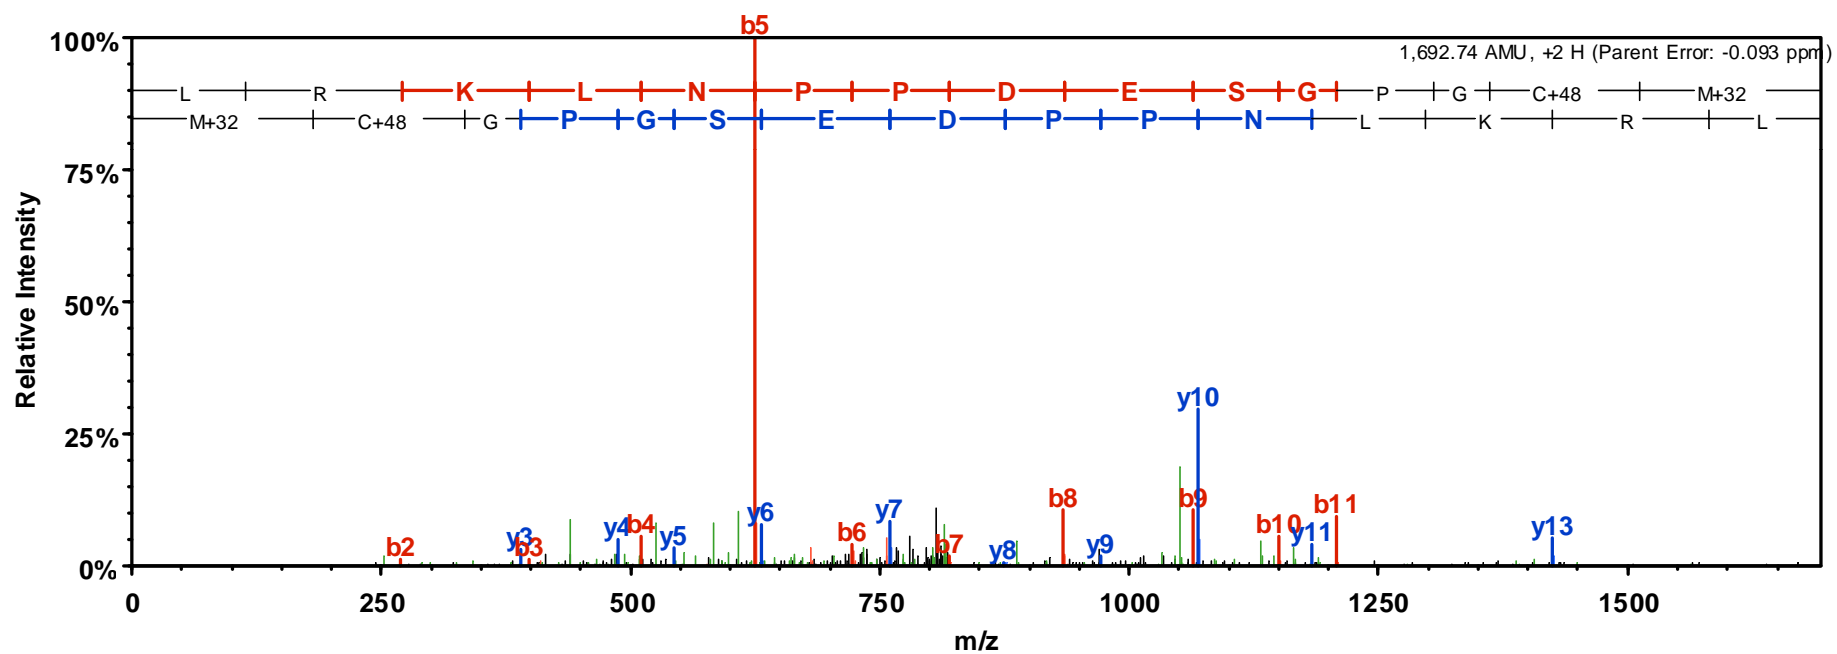

# Hemoglobin subunit delta

TFSQLSELHC94DKLHVDPENFR

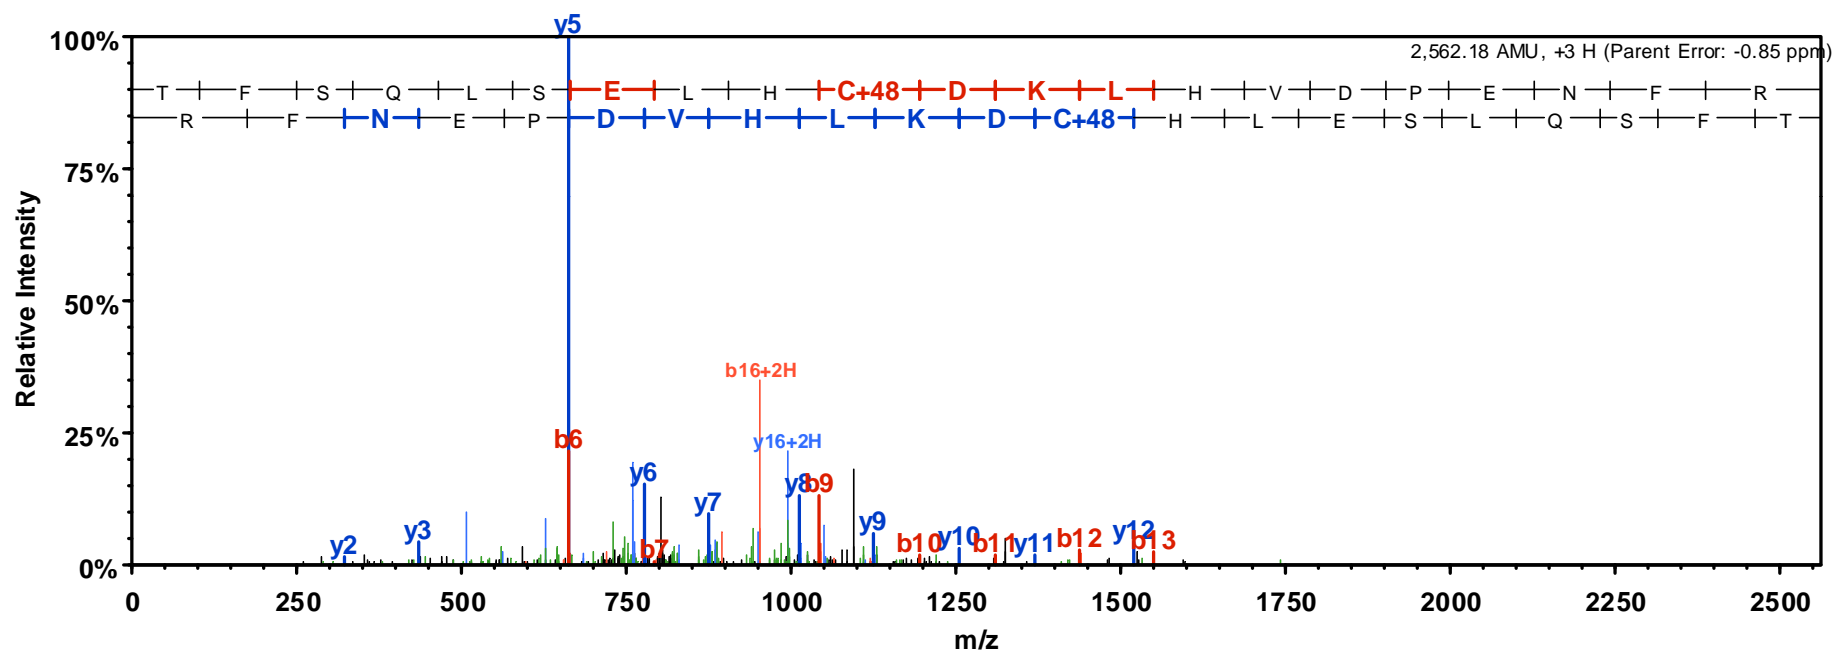

# Interleukin-1 receptor antagonist protein IDVVPIEPHALFLGIHGGKMCLSC94VK

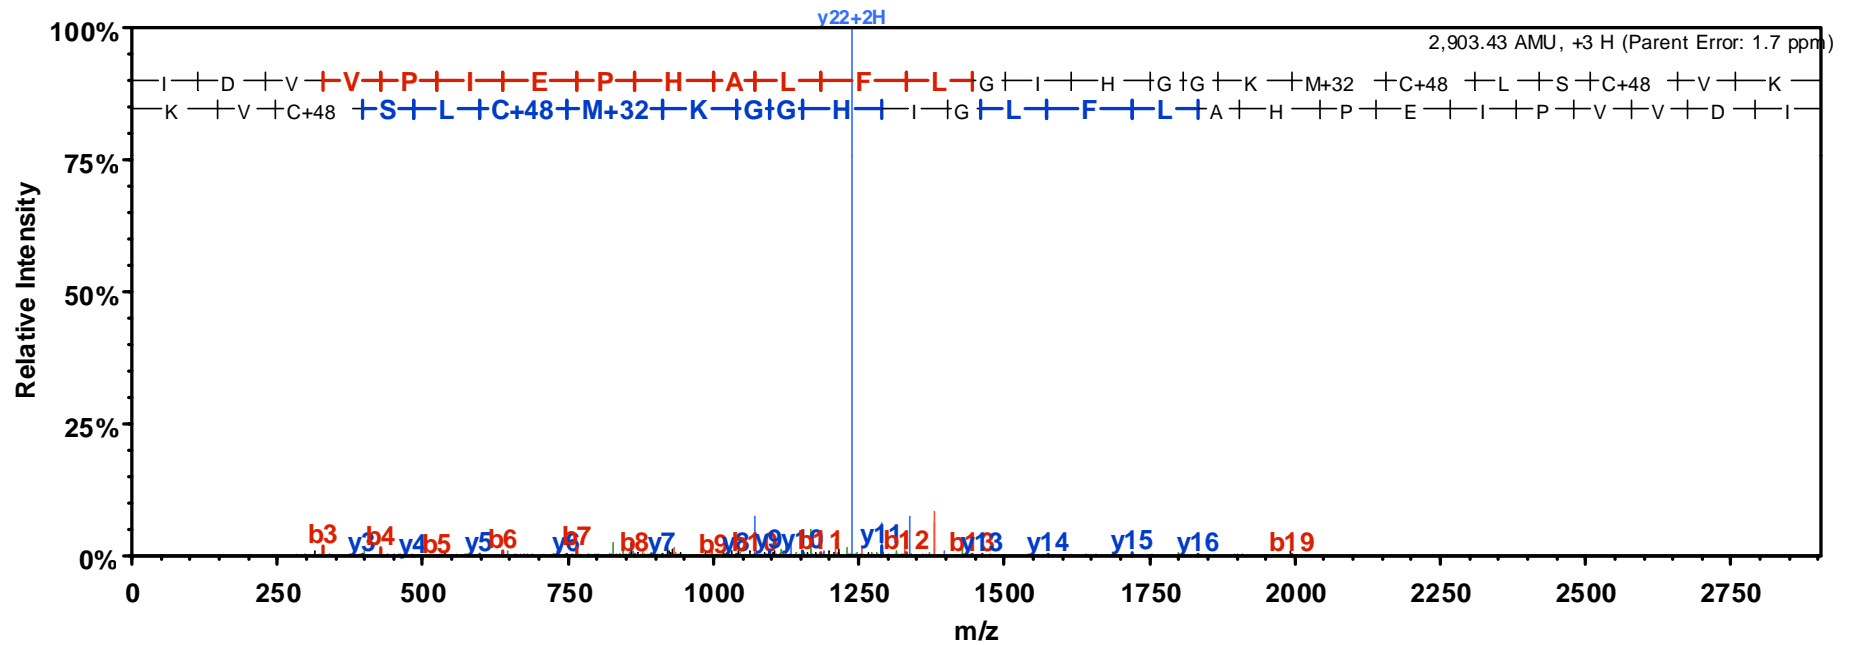

# Isocitrate dehydrogenase [NADP] cytoplasmic C73ATITPDEKRVVEEFK

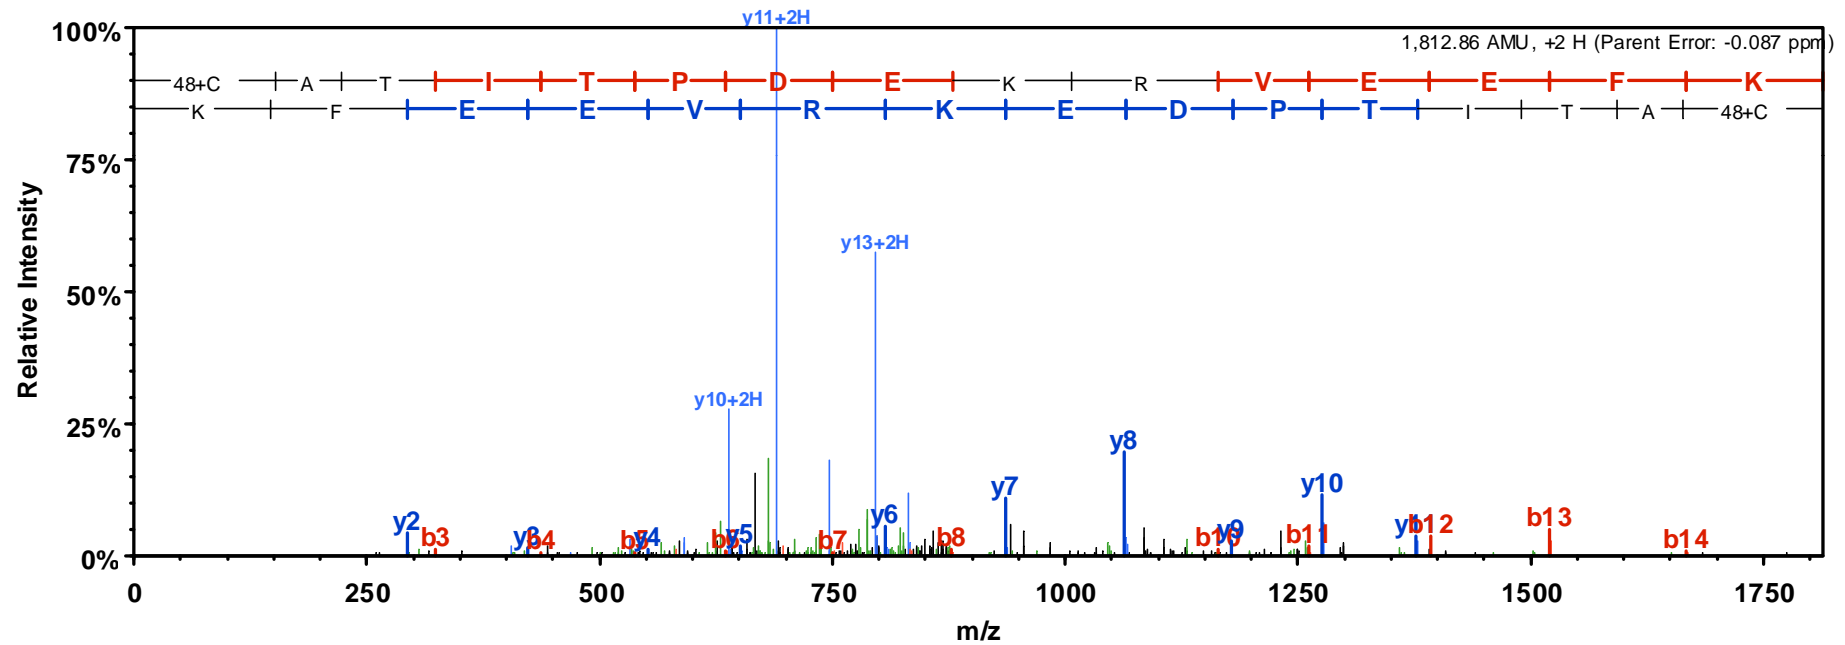

Isocitrate dehydrogenase [NADP] cytoplasmic  
NILGGTVFREAIC114KNIPR

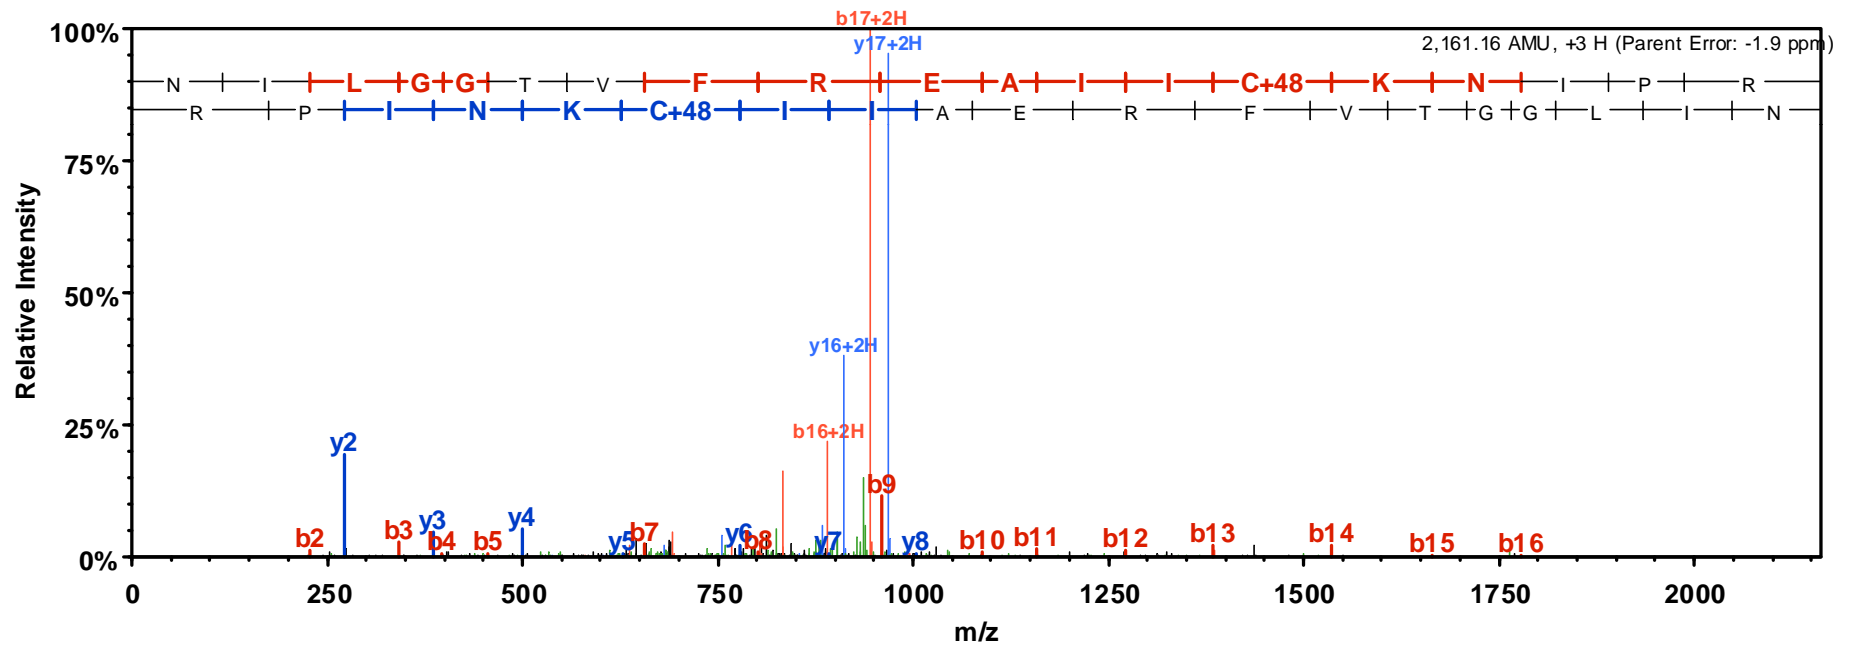



Isocitrate dehydrogenase [NADP] cytoplasmic  
DLAAC379IKGLPNVQR

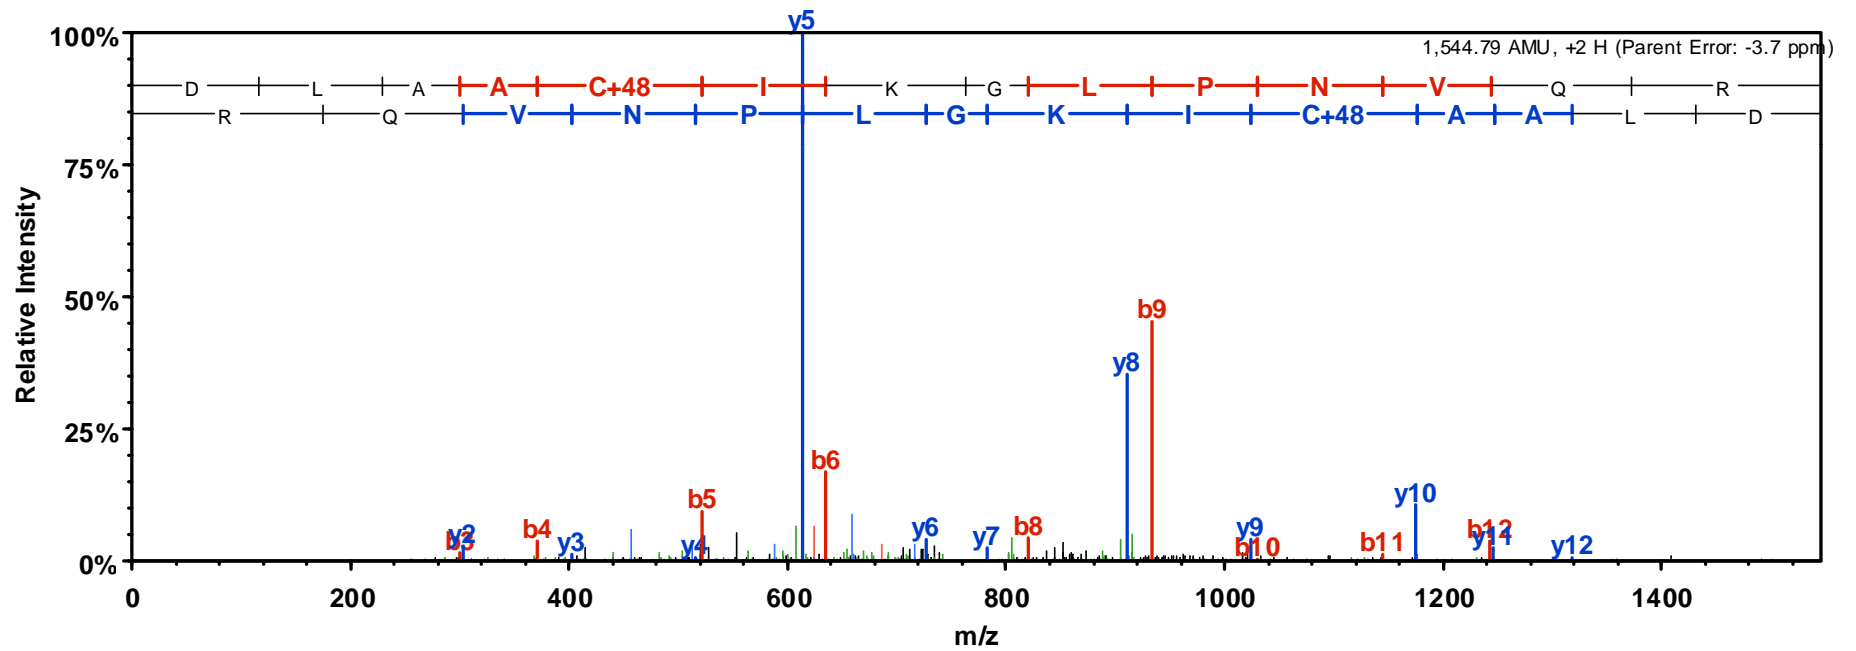

# Macrophage migration inhibitory factor ALC60SLHSIGK

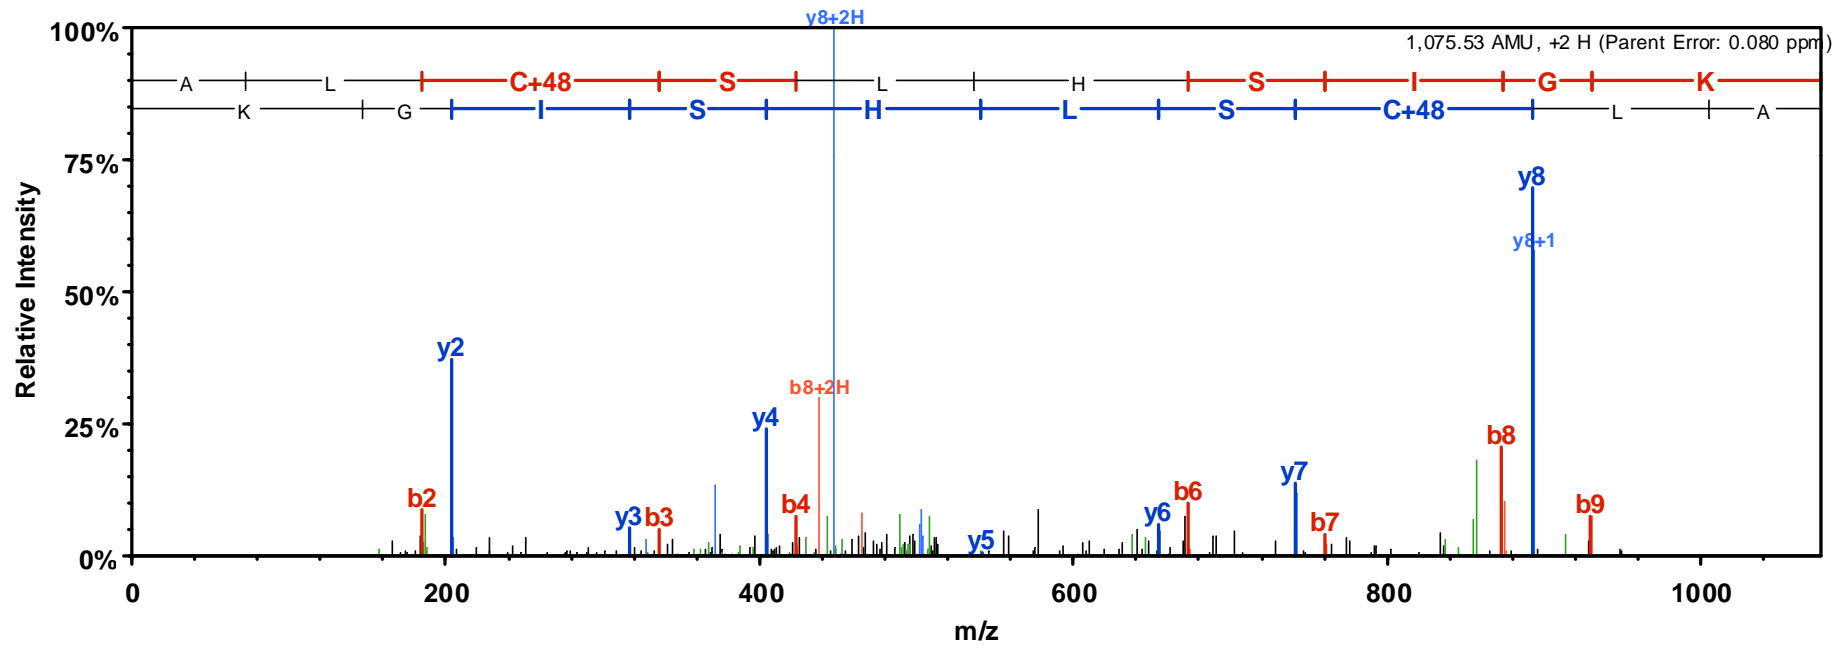

# Macrophage migration inhibitory factor SYSKLLC81GLLAERLR

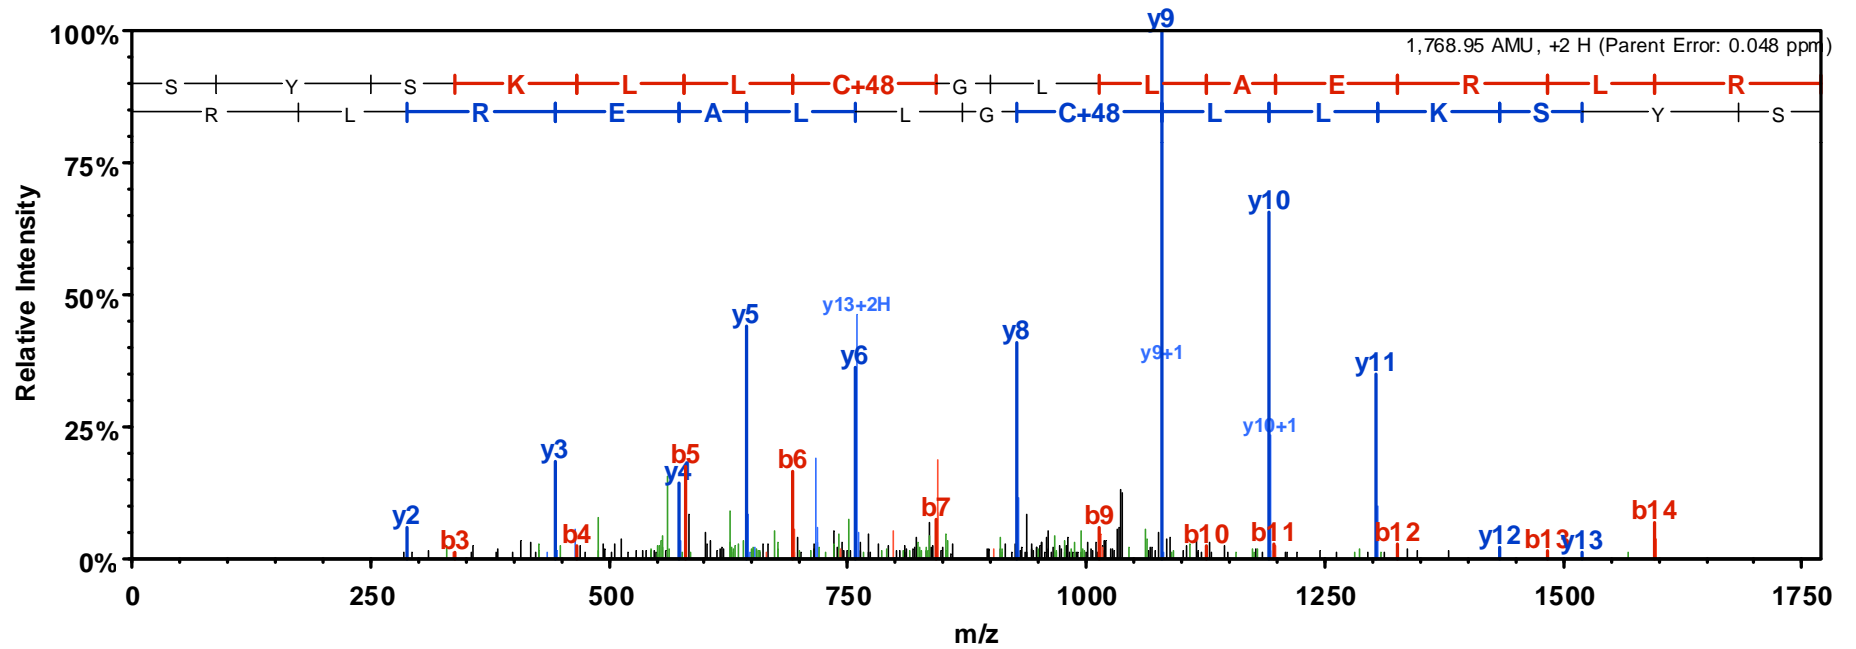

# Malate dehydrogenase, cytoplasmic SAPSIPKENFSC154LTR

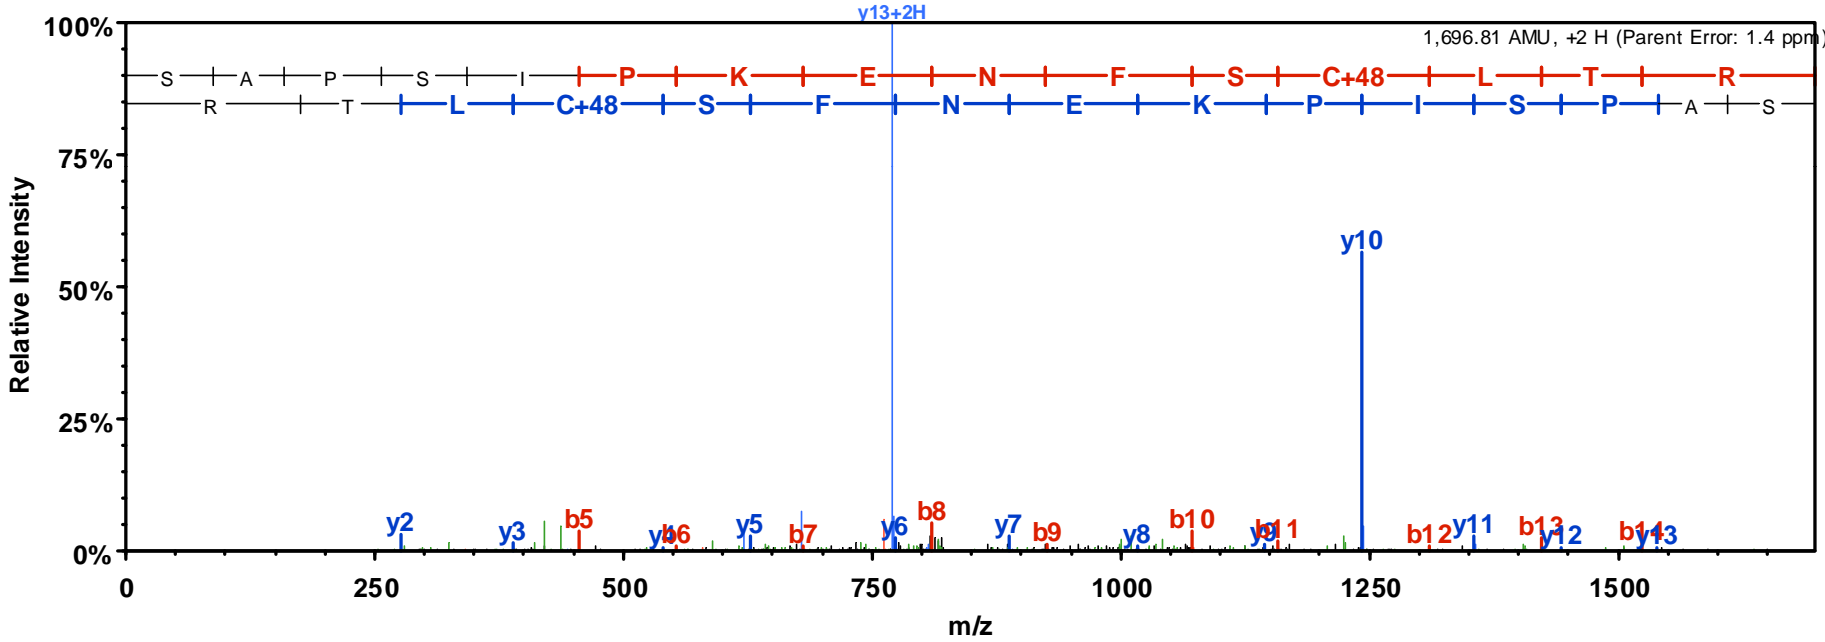

# Mitochondrial carrier homolog 2

## LC79SGVLGTVVHGK

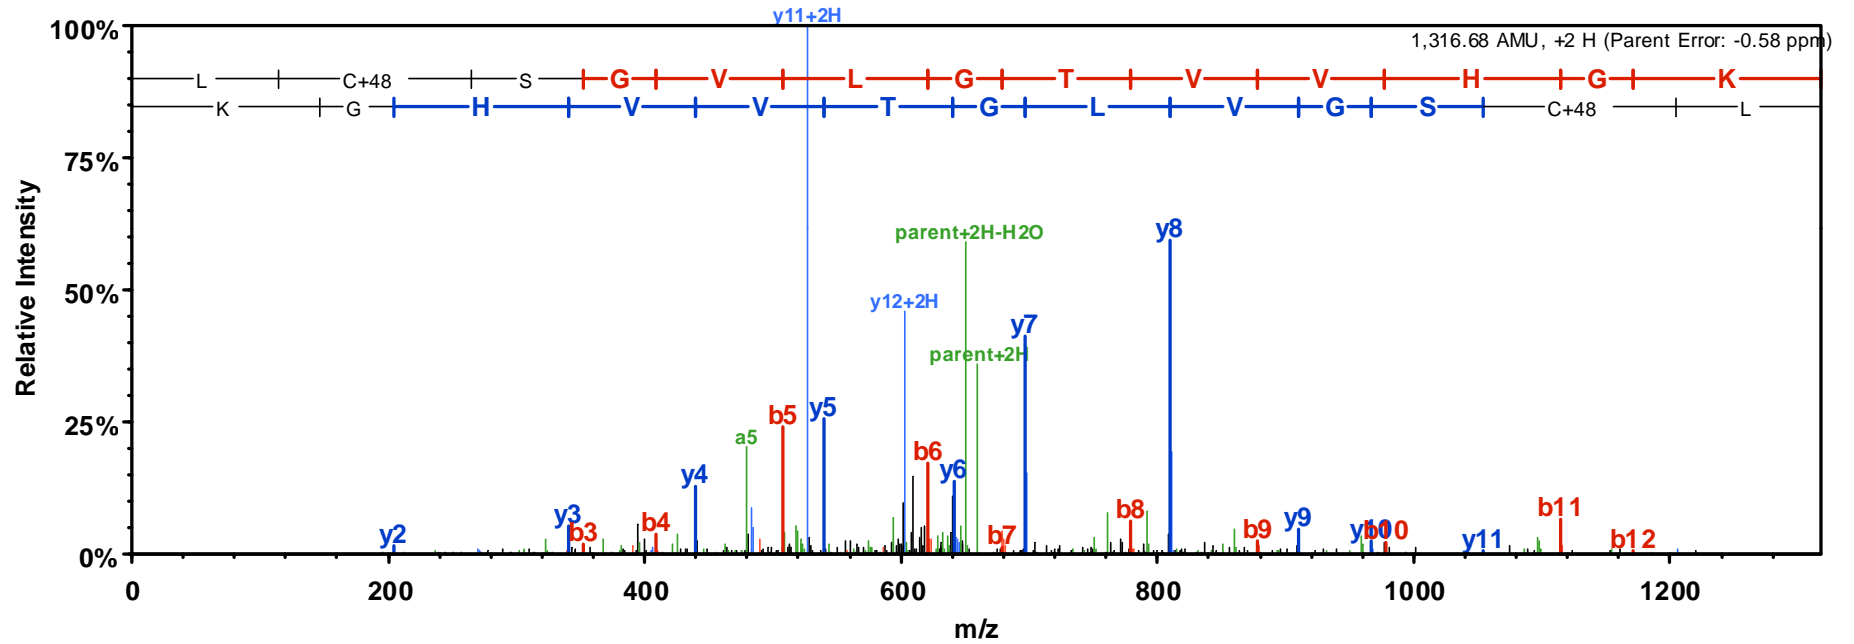

Na(+)/H(+) exchange regulatory cofactor NHE-RF1  
 LC15C16LEKGPNGYGFHLHGEK

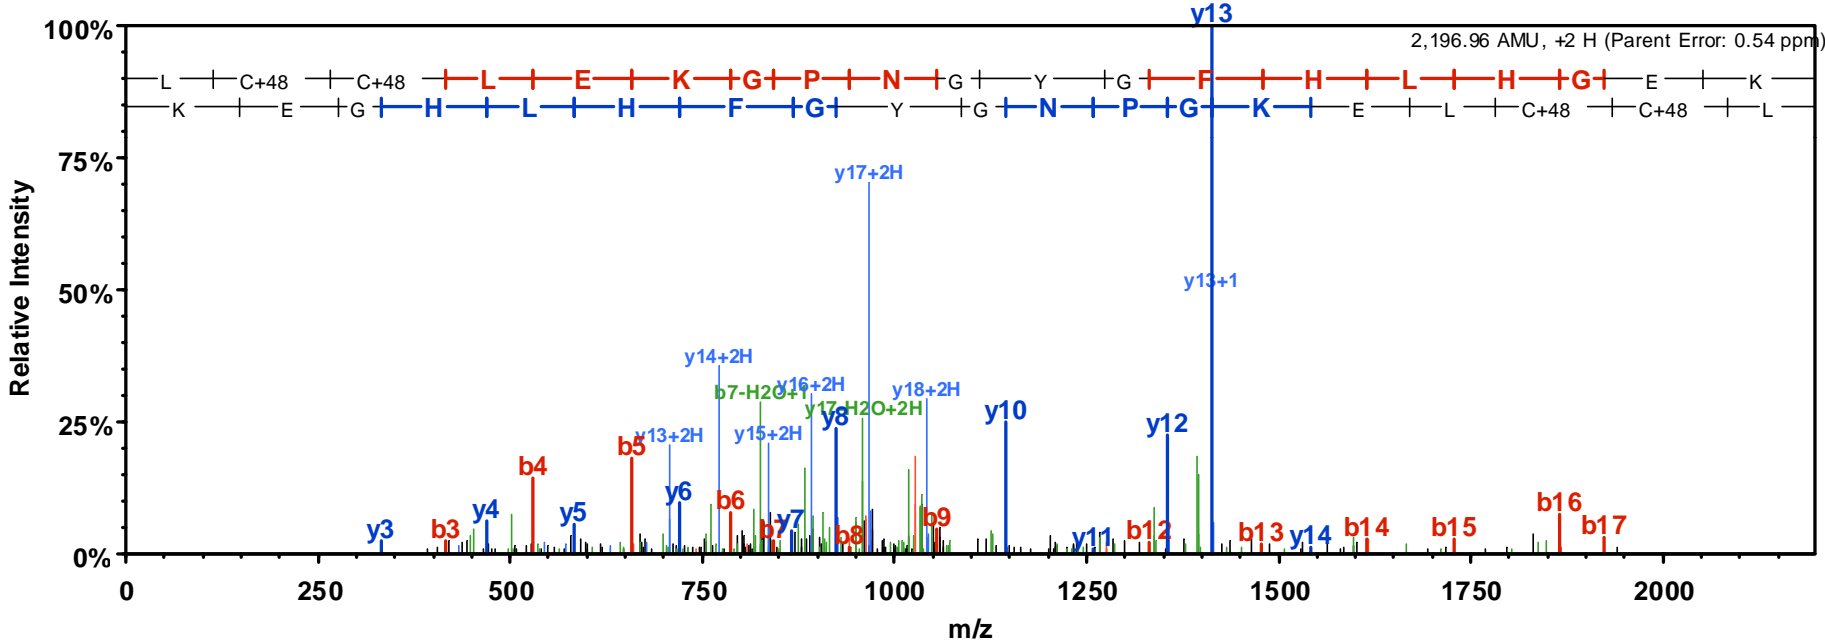

Na(+)/H(+) exchange regulatory cofactor NHE-RF1  
IVEVNGVC206MEGKQHGDVVSAIR

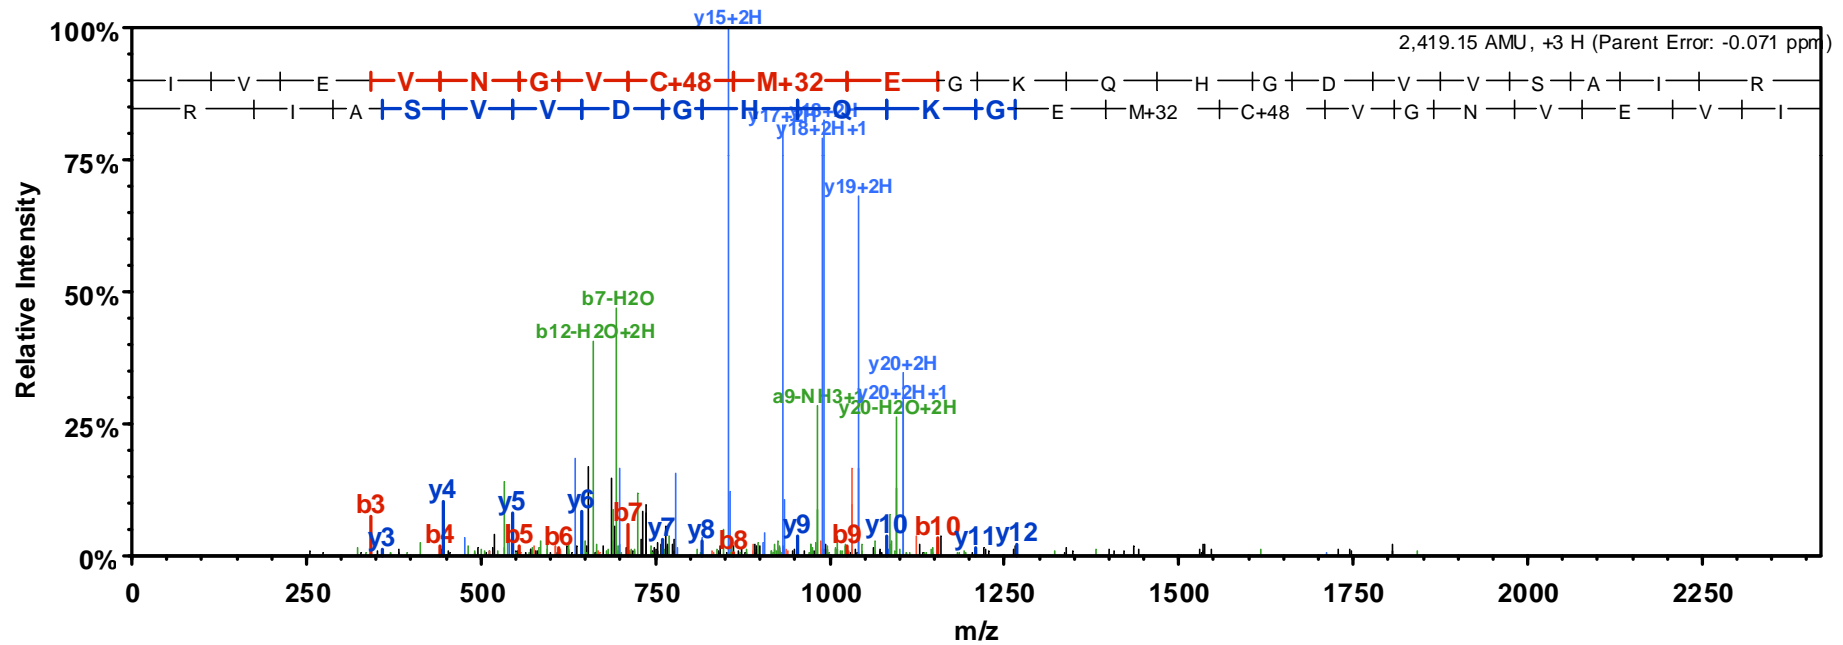

NADH dehydrogenase [ubiquinone] iron-sulfur protein 6  
SLPLGARC27F

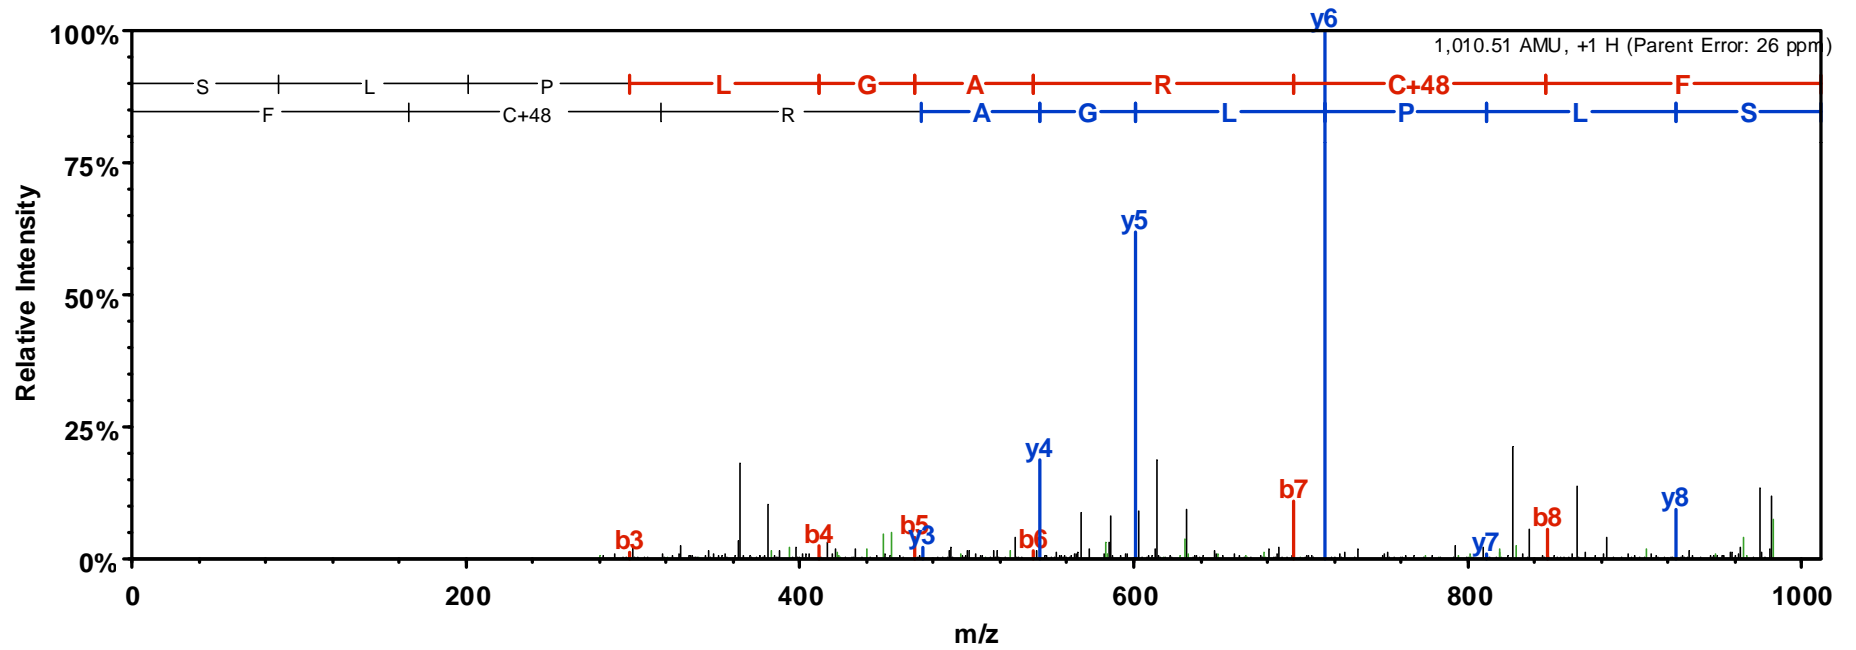



# NEDD4-like E3 ubiquitin-protein ligase WWP2 HQPPSTNC186FGGR

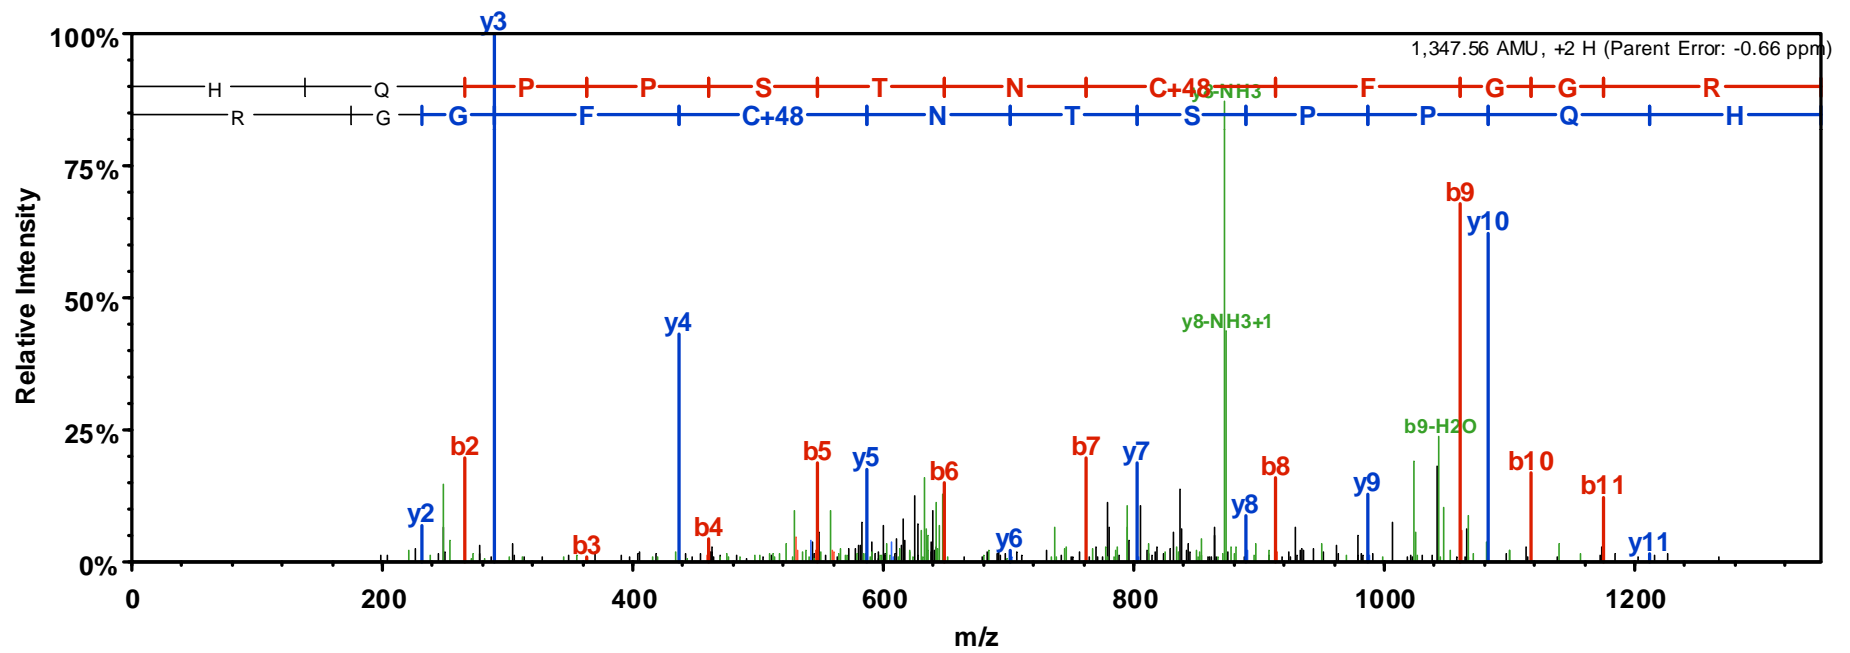

# Nuclear RNA export factor 1 C143SVPFTPIEFHYENTR

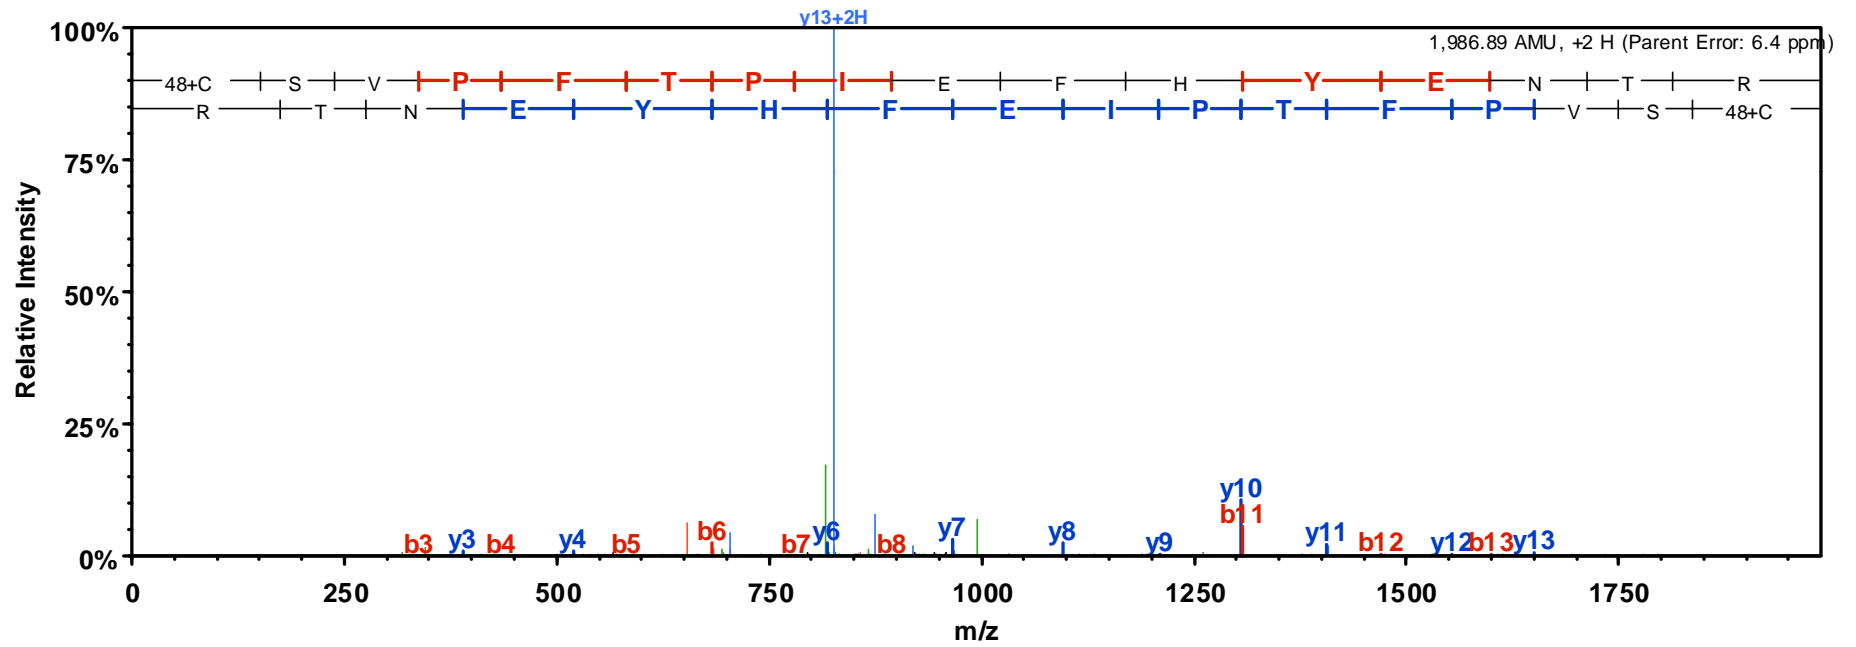

# Olfactomedin-like protein 1 DEC111VSEDK

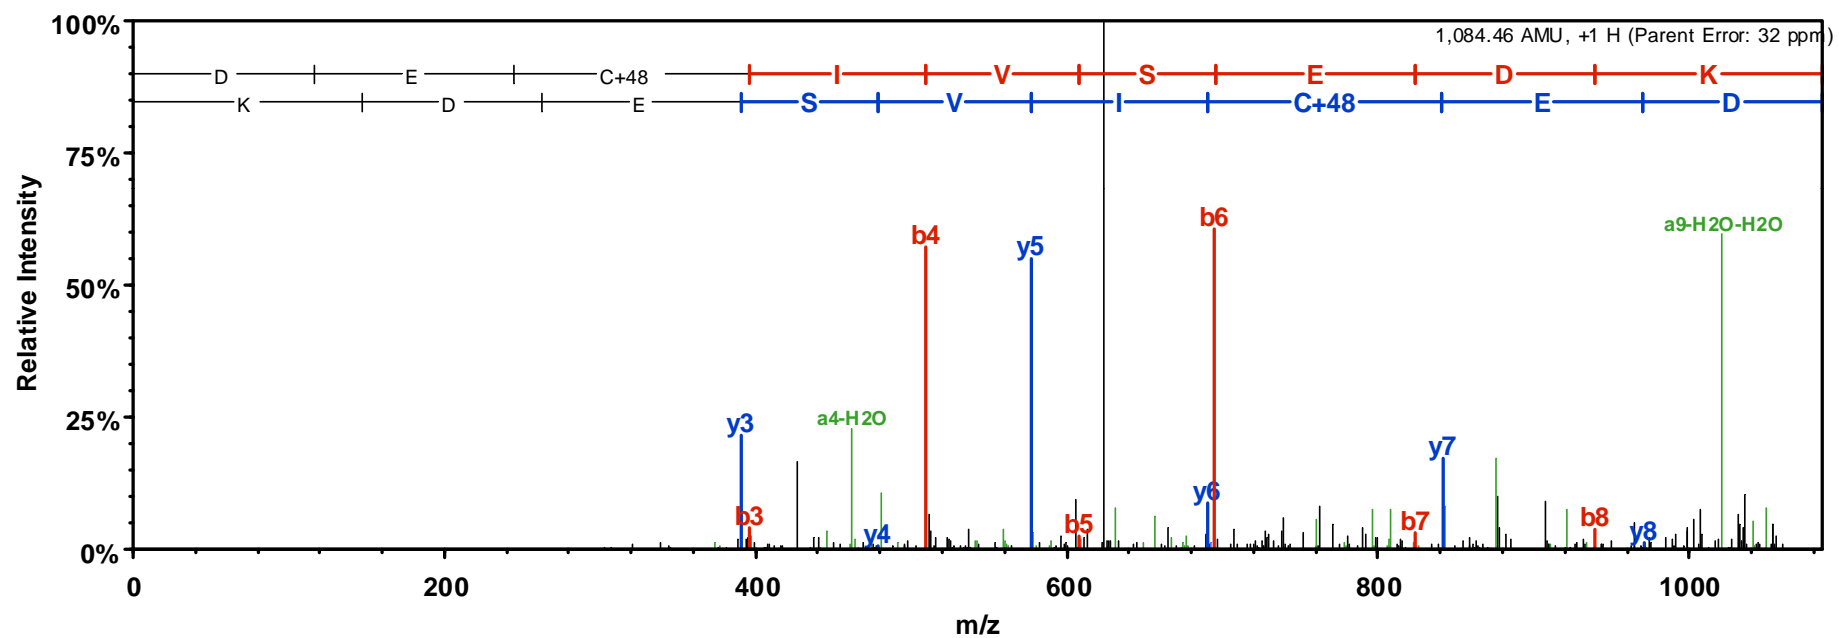

# Pre-mRNA-splicing factor SYF1 LLPC66SYK

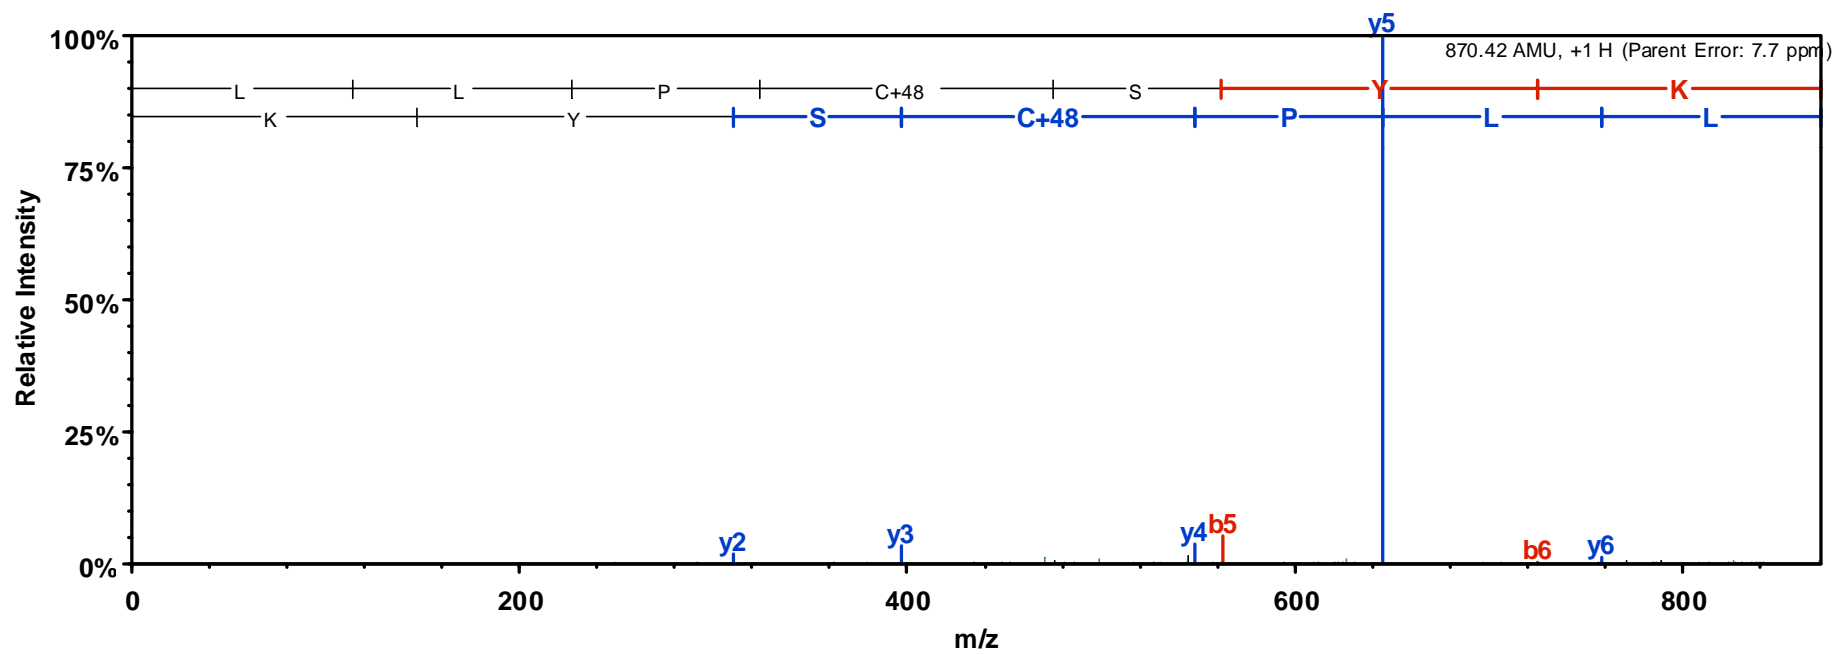

Protein DJ-1  
VTVAGLAGKDPVQC46SR

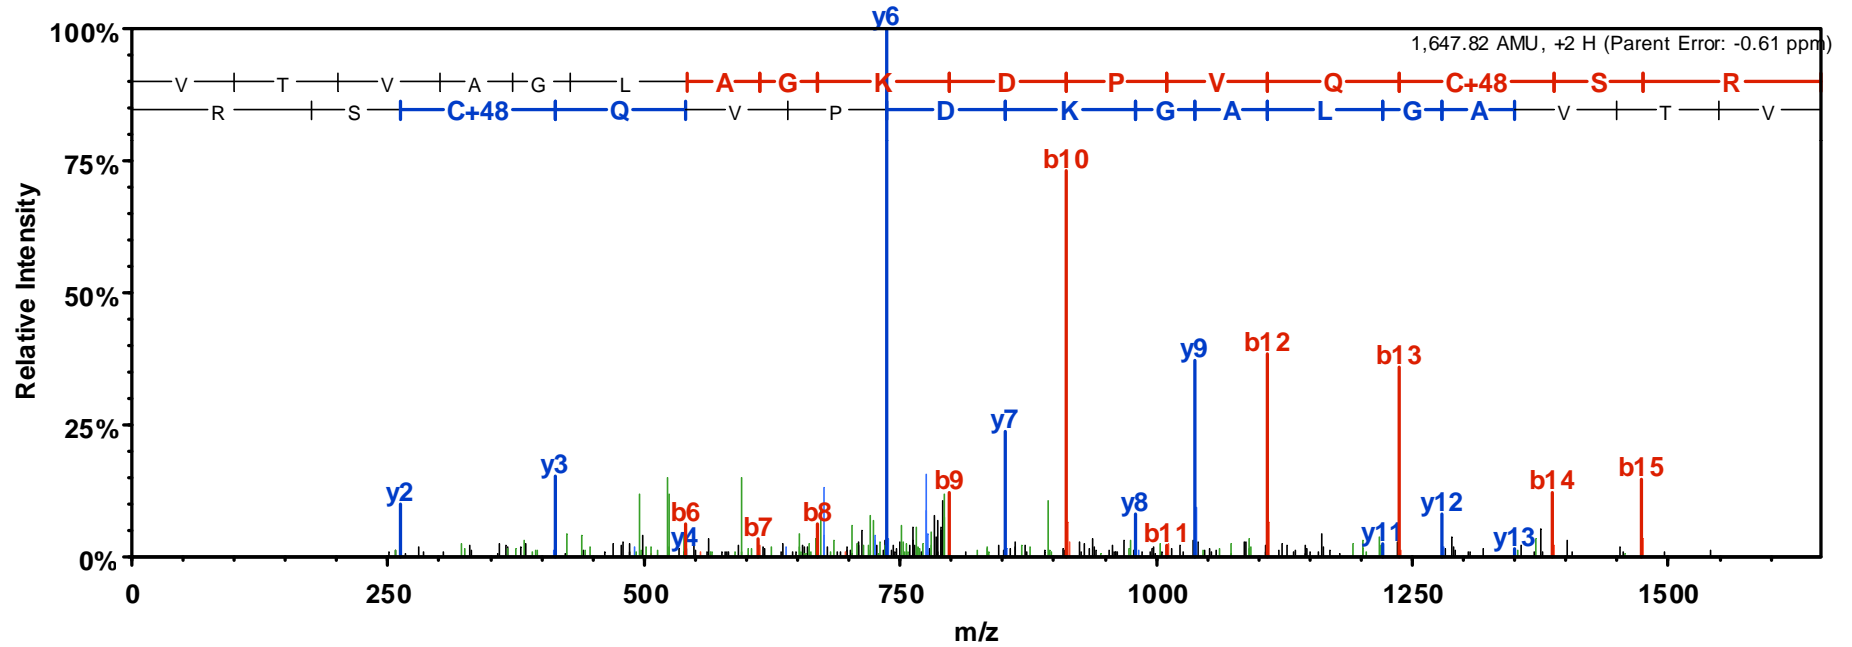

# Protein S100-A11

## ISSPTETERC13IESLIAVFQK

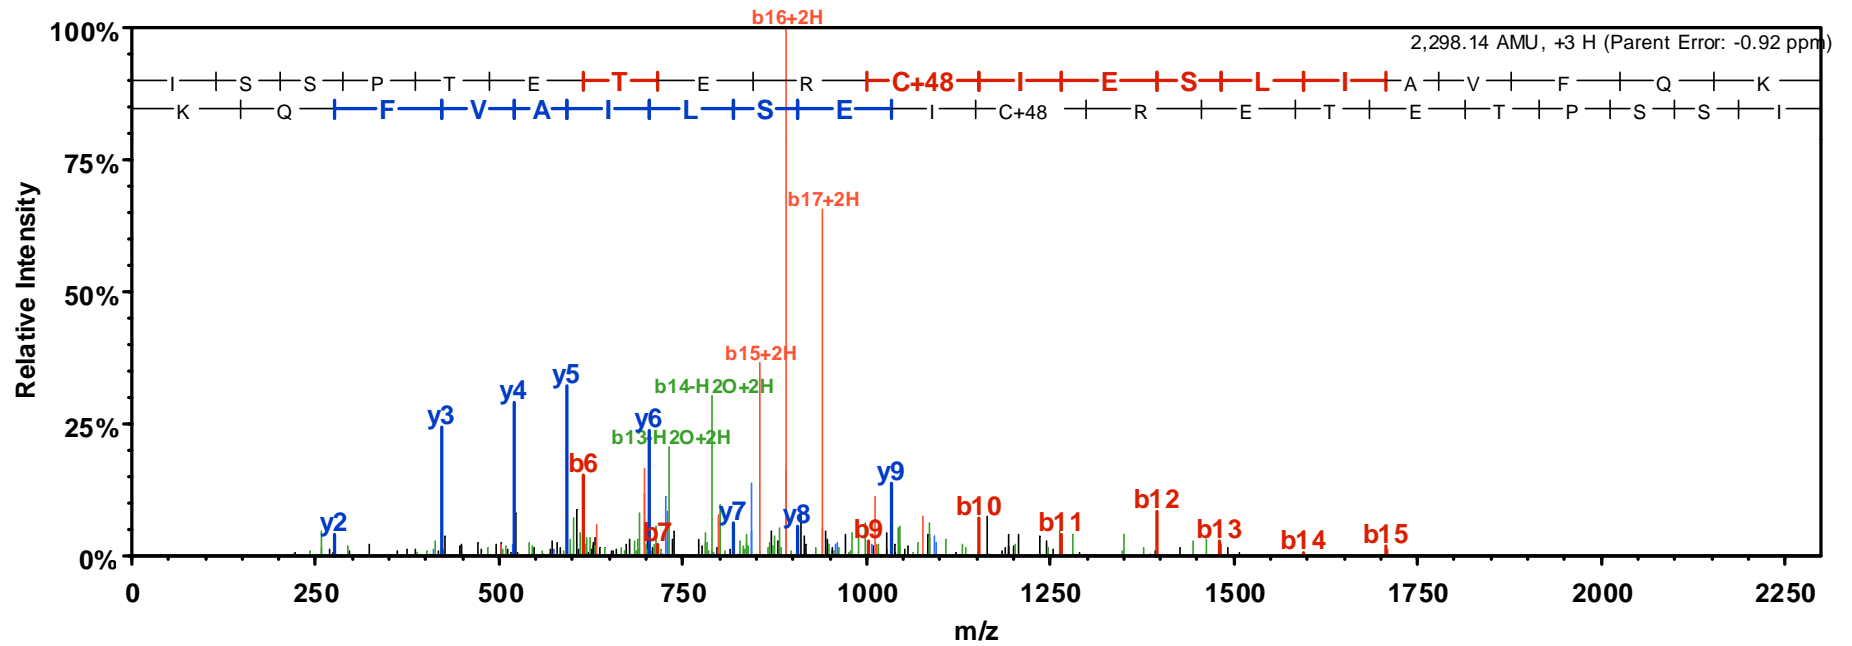

Protein S100-A8  
KLLETEC42PQYIR

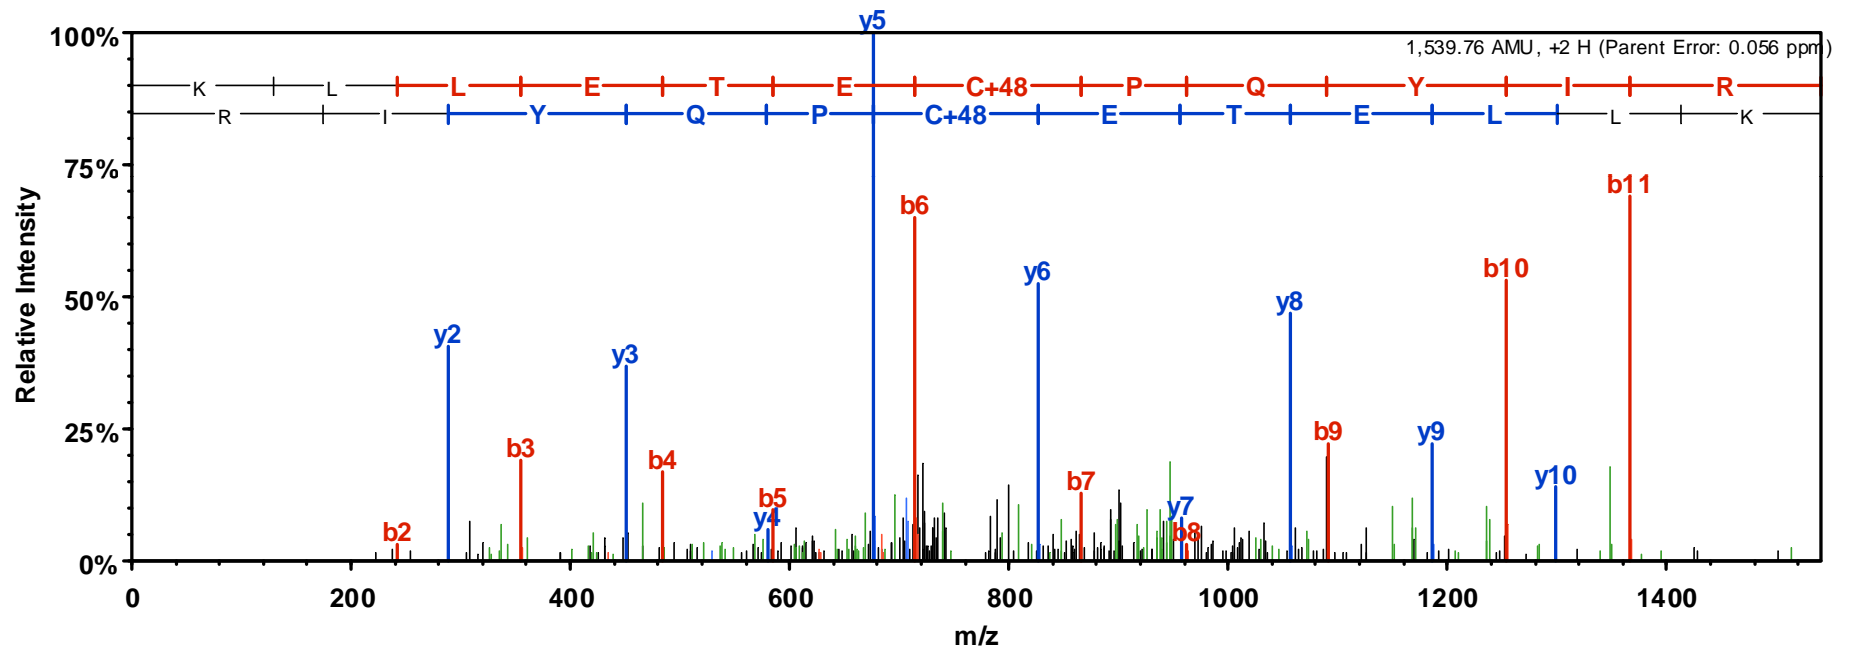

Protein transport protein Sec31A  
C1130LSSATDPQTKR

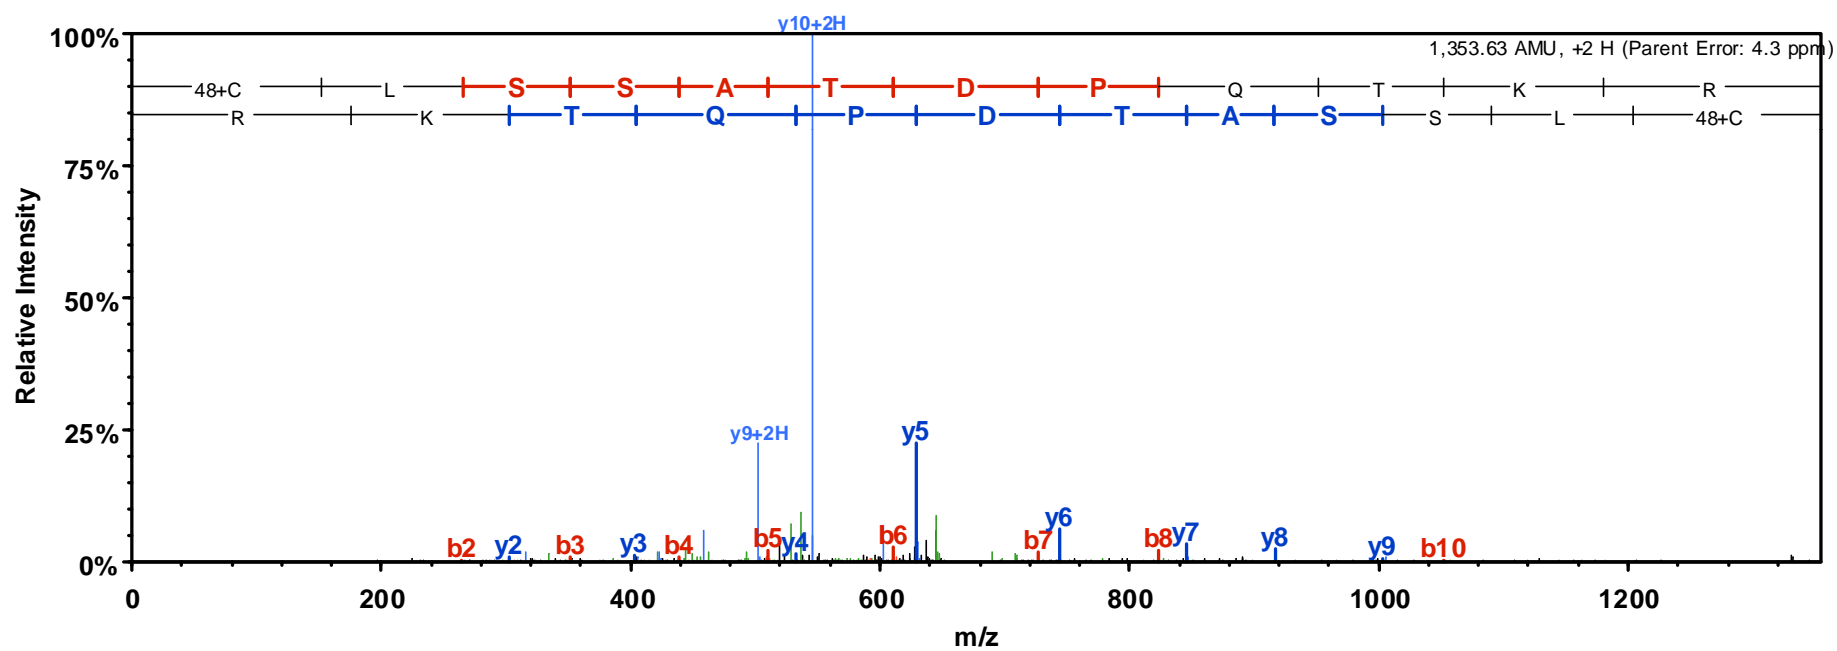



Putative adenosylhomocysteinase 2  
AGKLC272VPAMNVNDSVTK

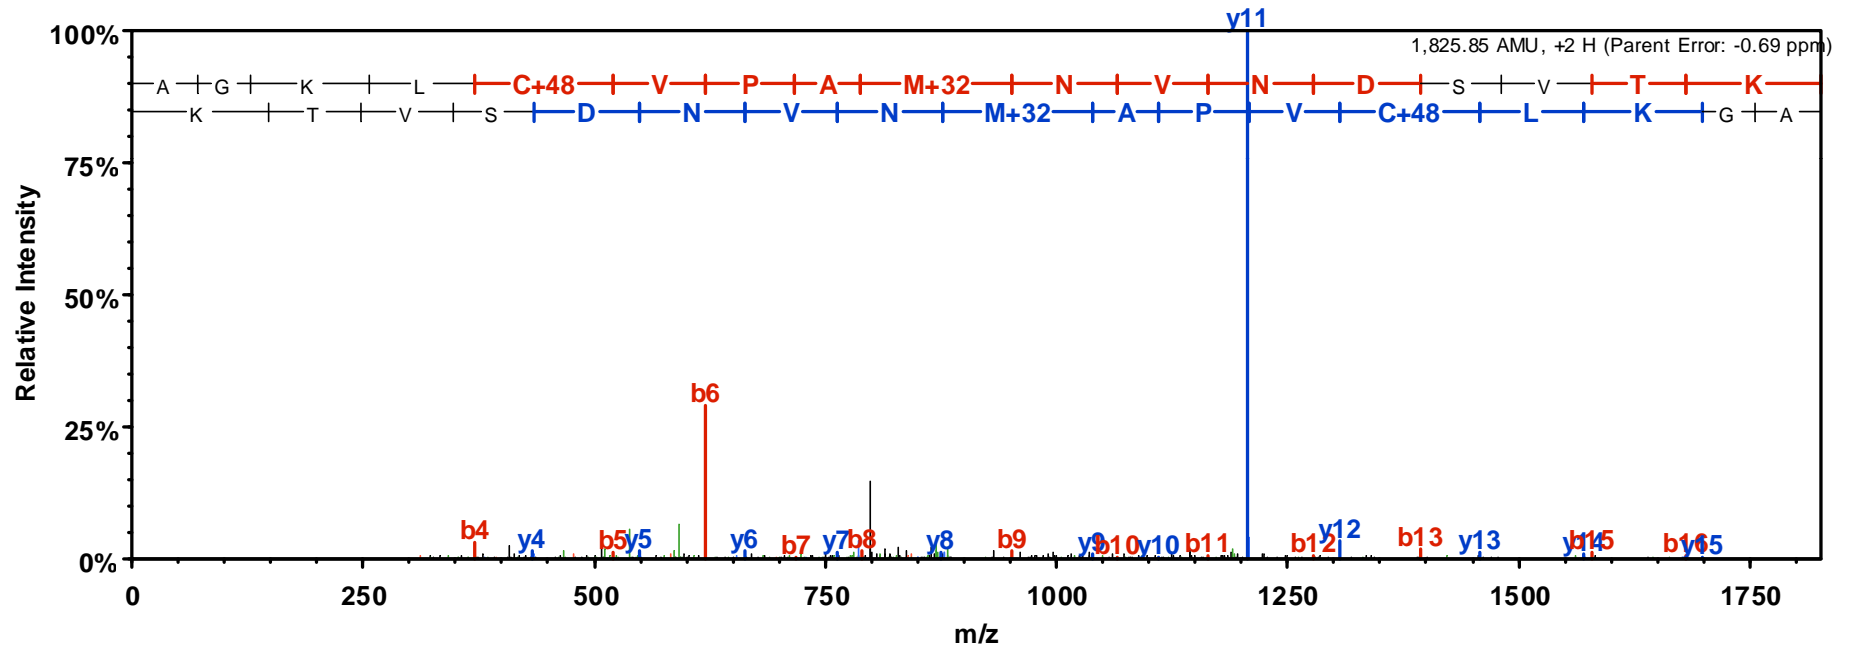

# Quinone oxidoreductase VHAC45GVNPVETYIR

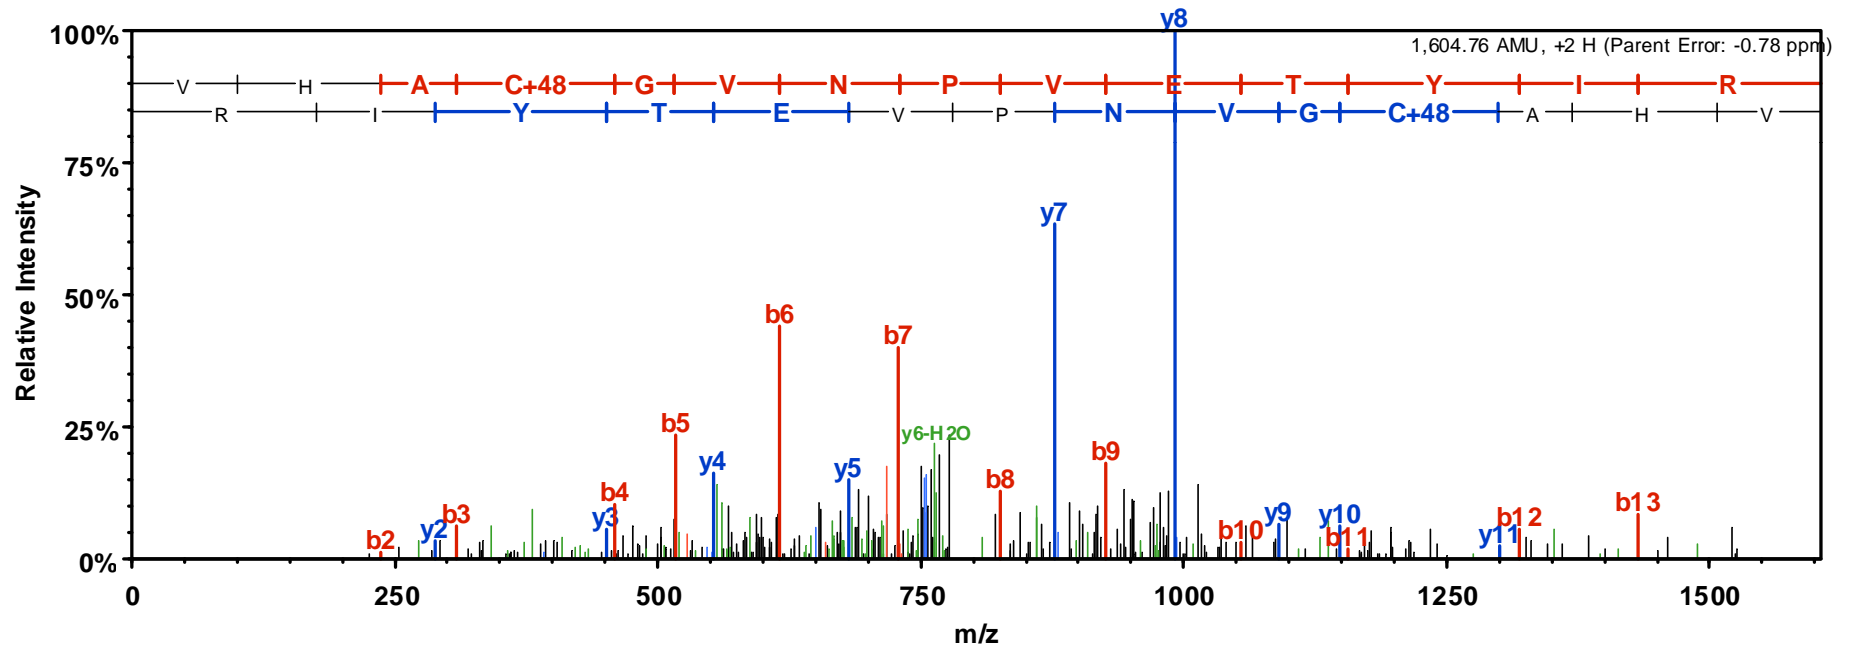

Rab-like protein 2A  
IIC26LGDSAVGK

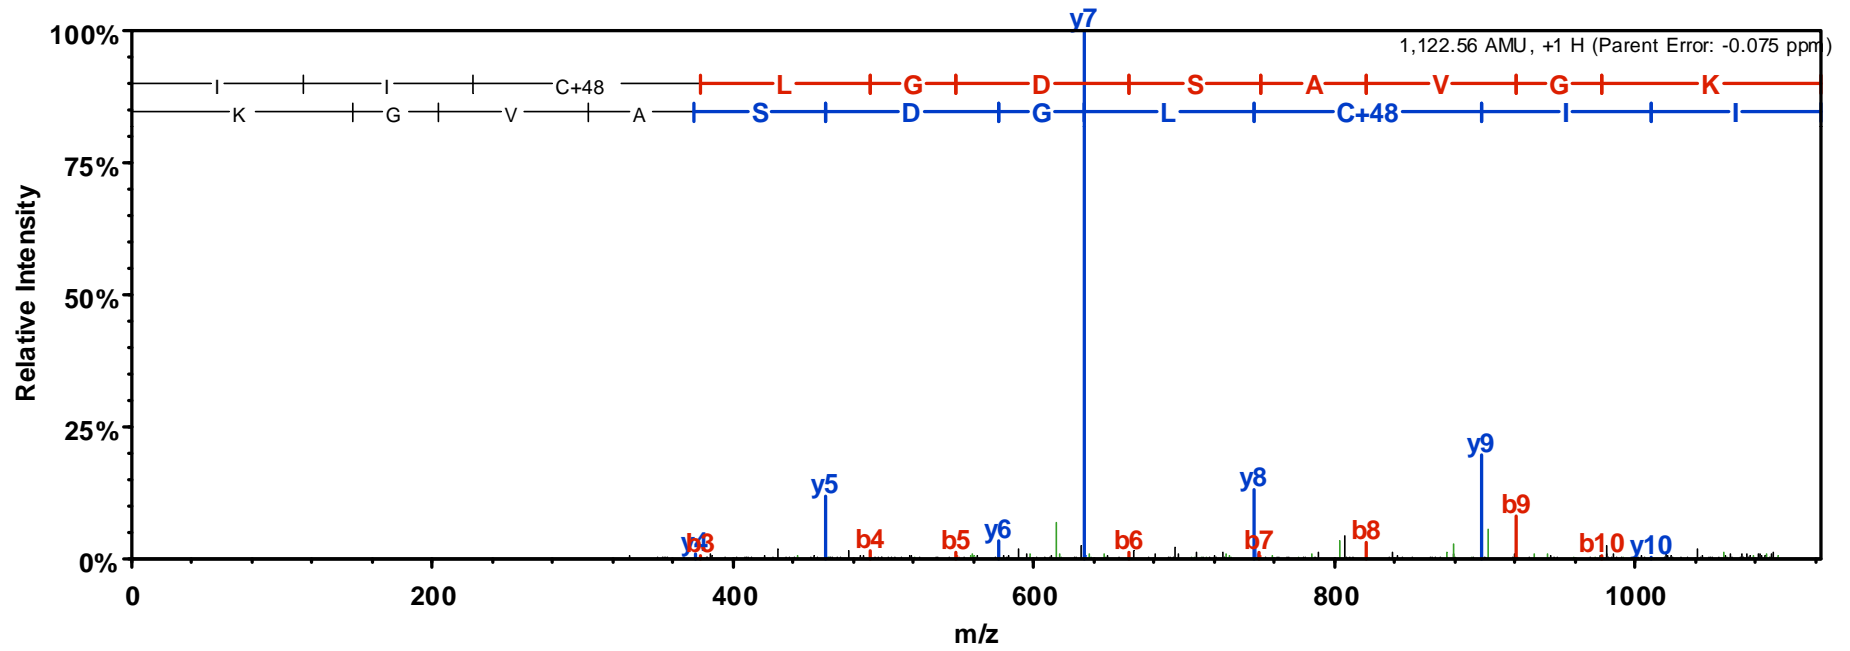

# Ras-related C3 botulinum toxin substrate 2

## TVFDEAIRAVLC178PQ

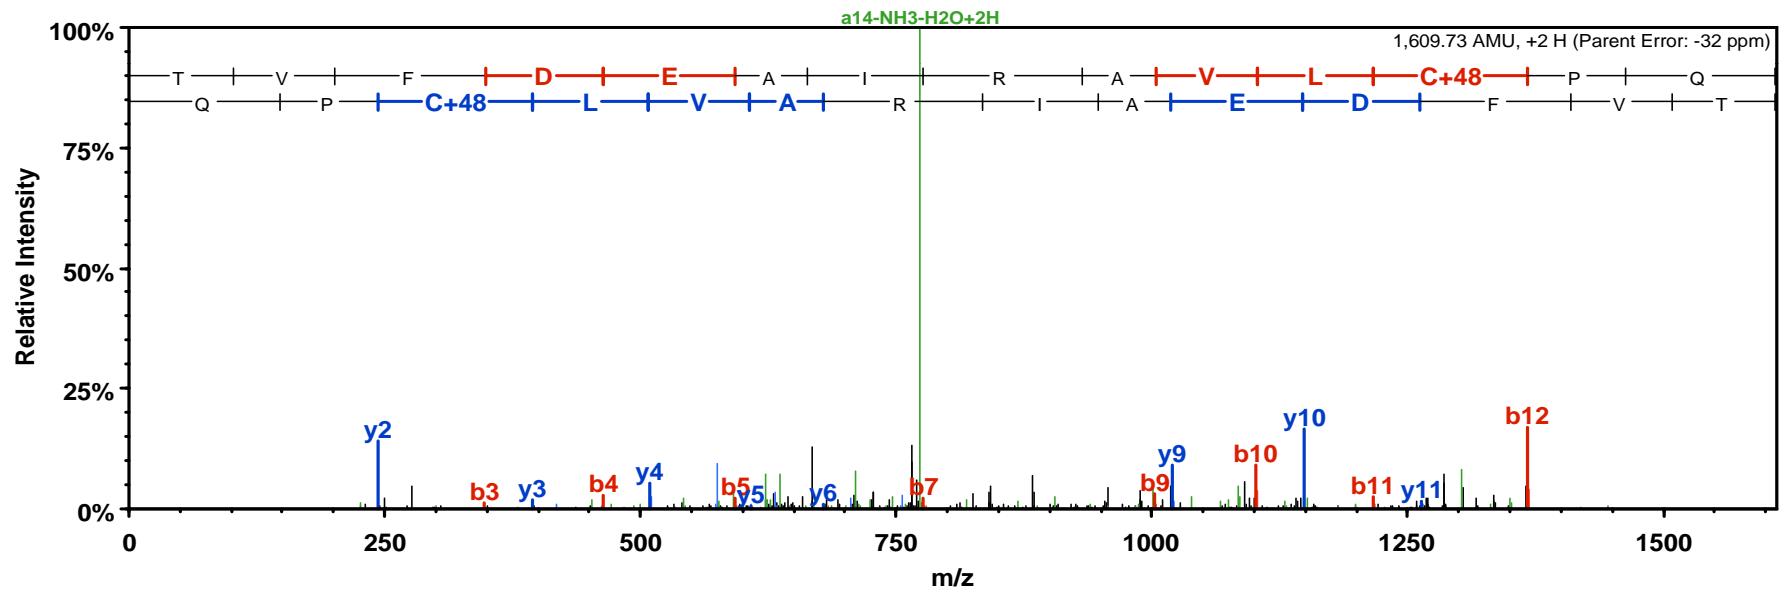

# Ras-related protein Rab-4B SC23LLHQFIENK

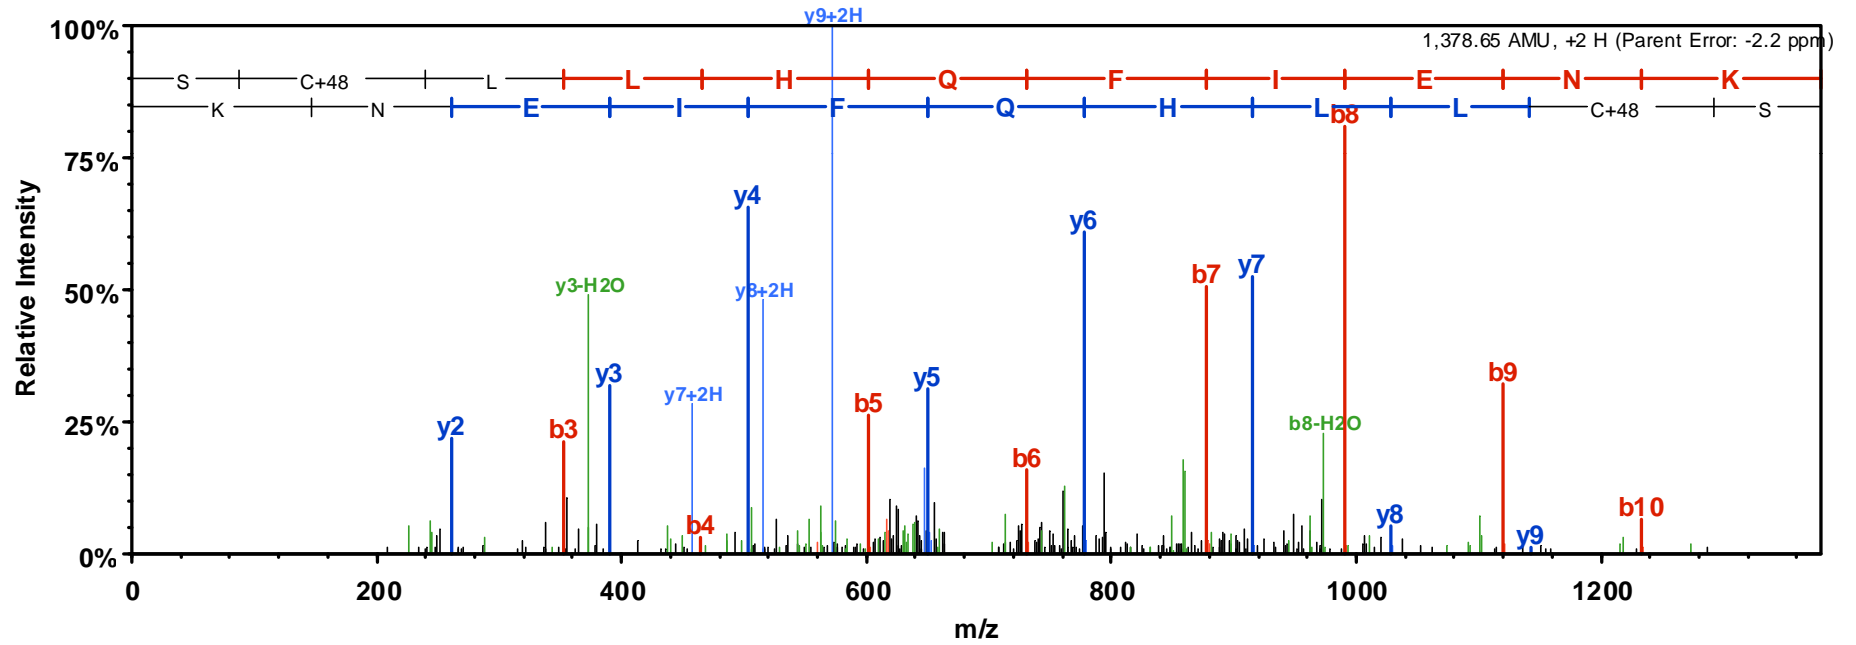

Ras-related protein Rab-4B  
TLASPNIIVVILC119GNKK

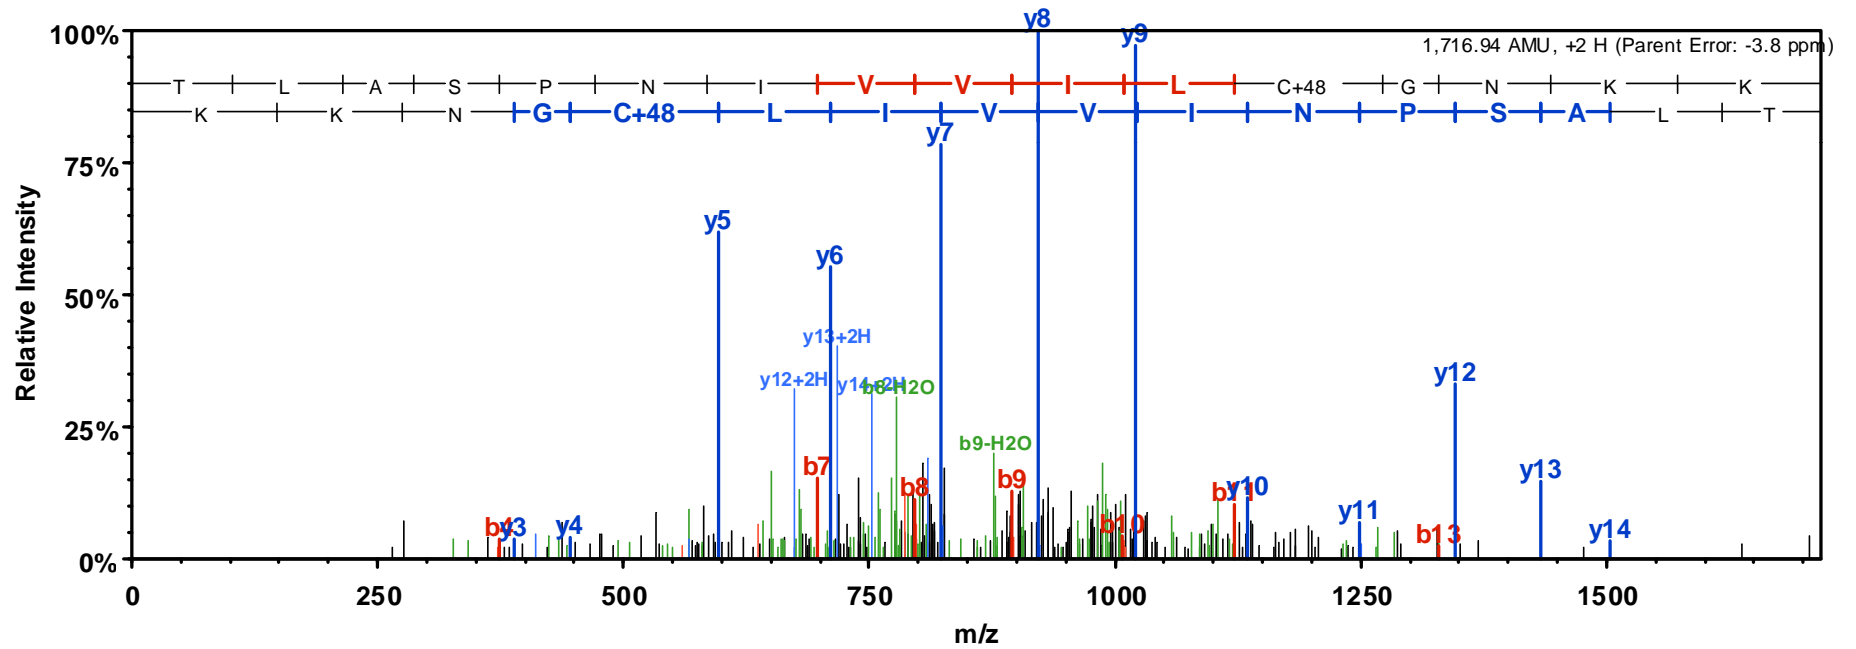

# RING finger protein 11

## GNC4LKSPTSDDISLLHESQSDR

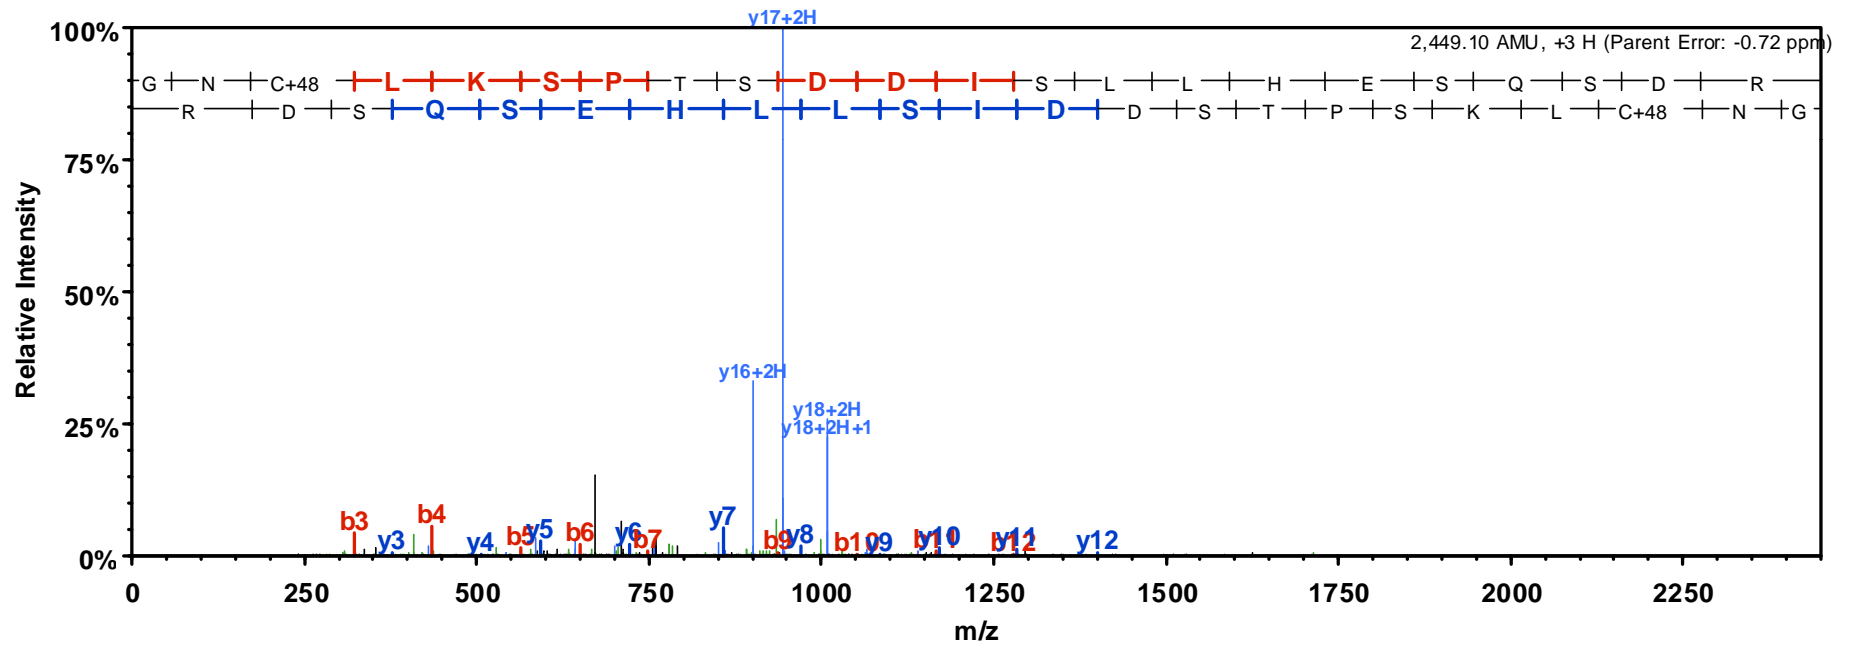

RING finger protein 141  
VVVRVVC82TKINK

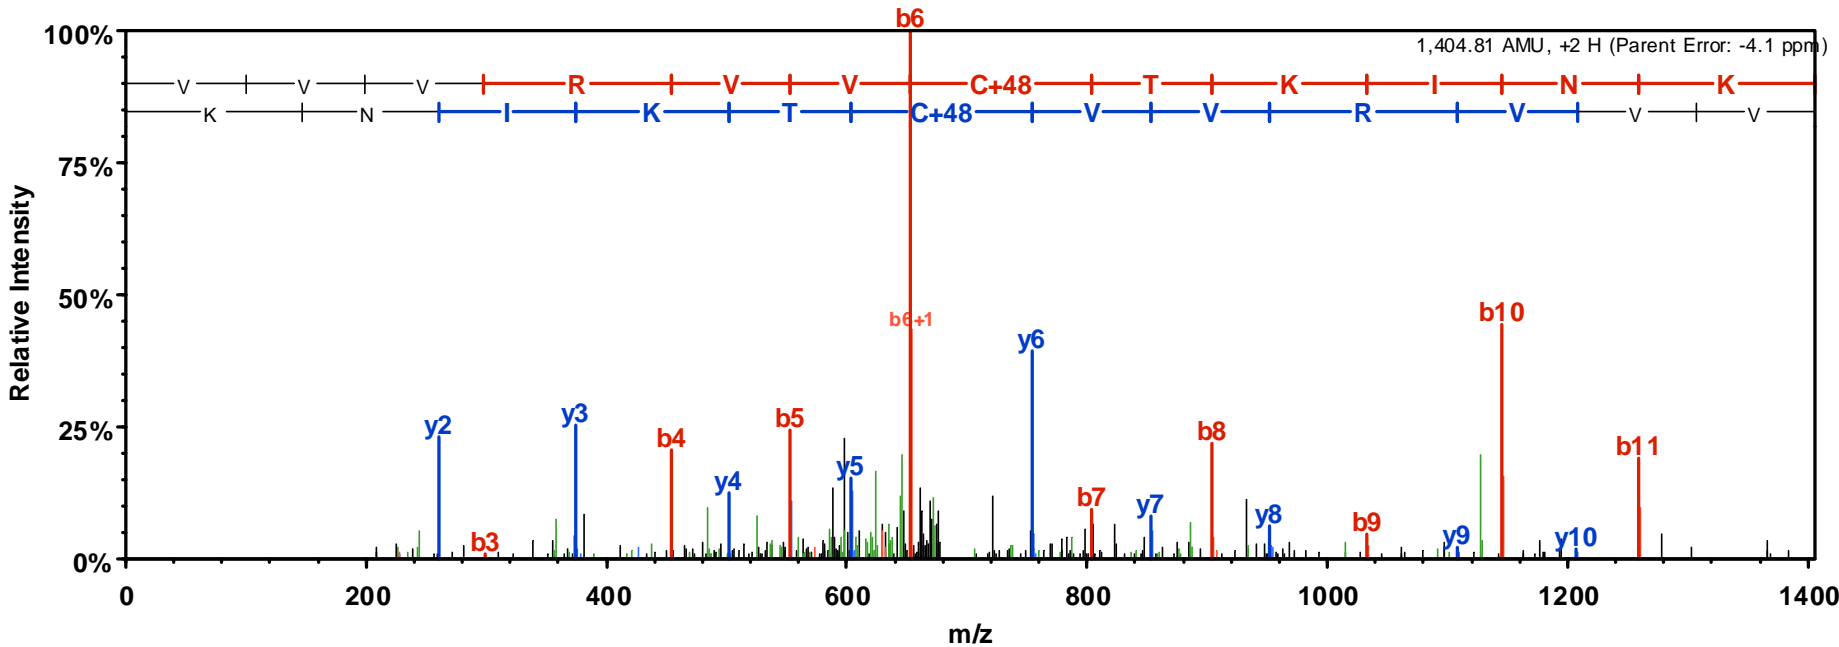



RING finger protein 141  
ADLILPCAHSFC175QK

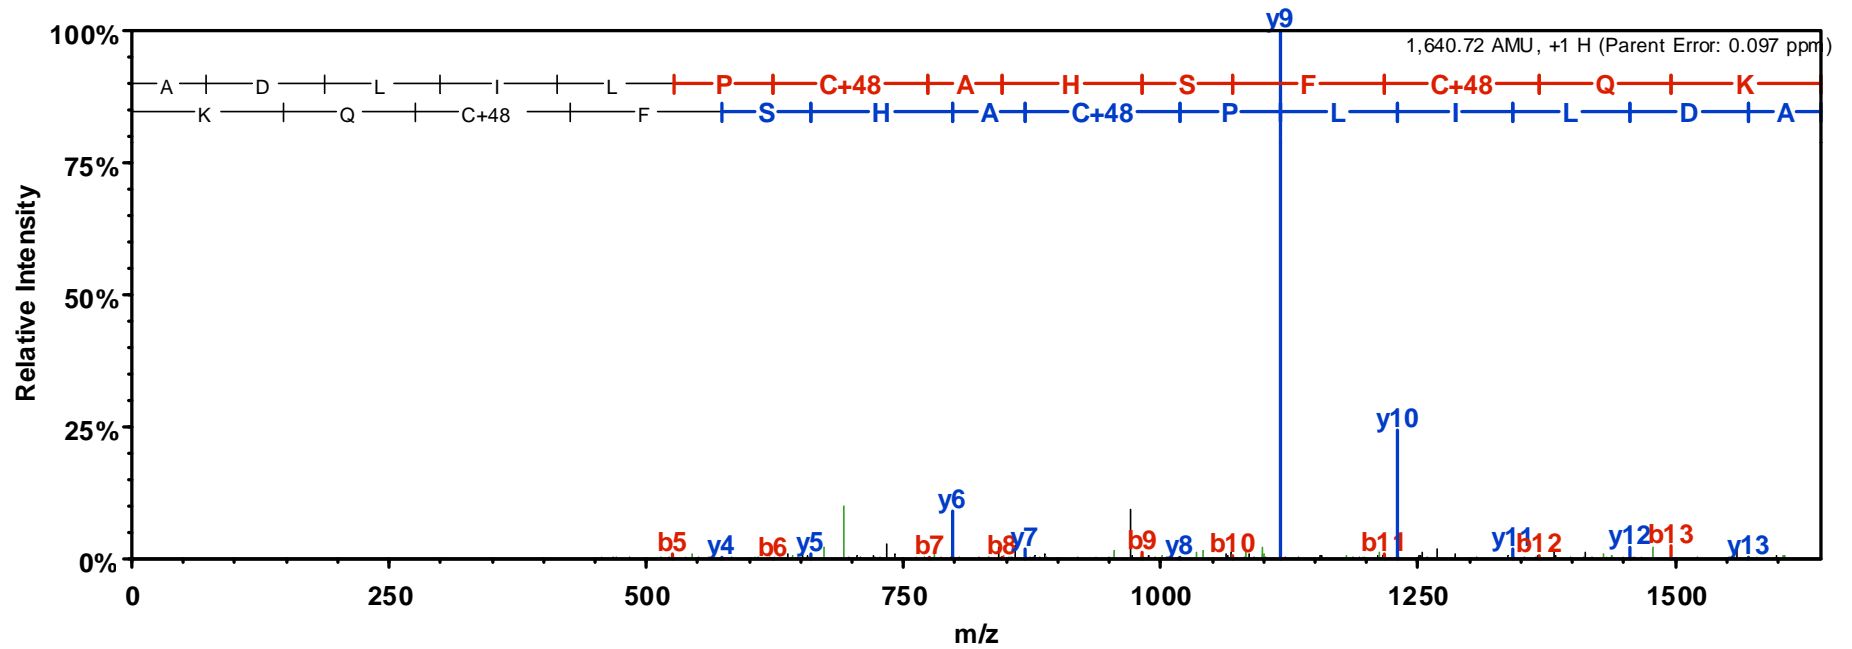

# Sarcoplasmic/endoplasmic reticulum calcium ATPase 2

## SMSVYC498TPNKPSR

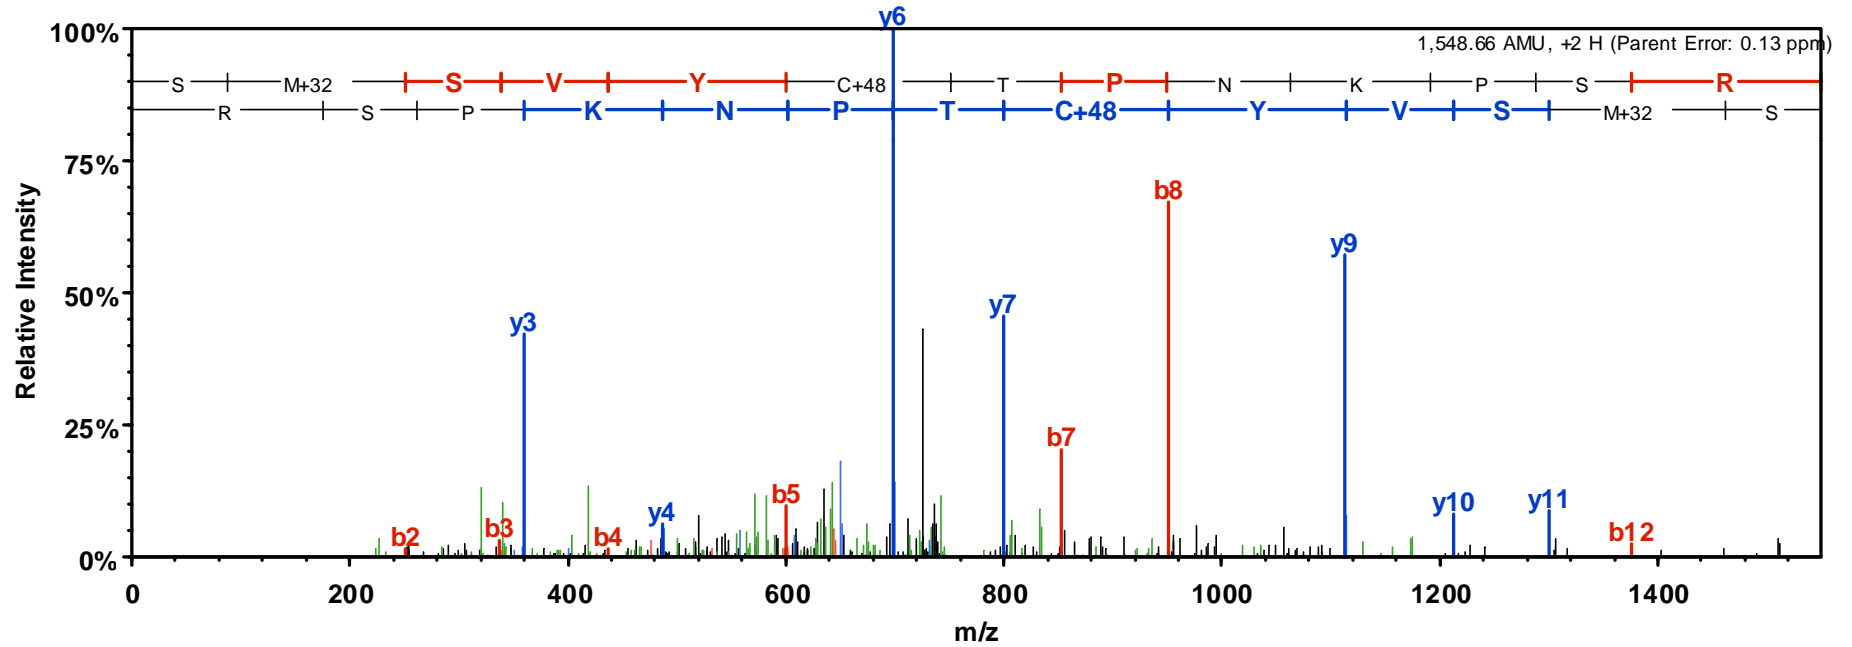

Serine/threonine-protein kinase 16  
ILC53HEQQDREEAQR

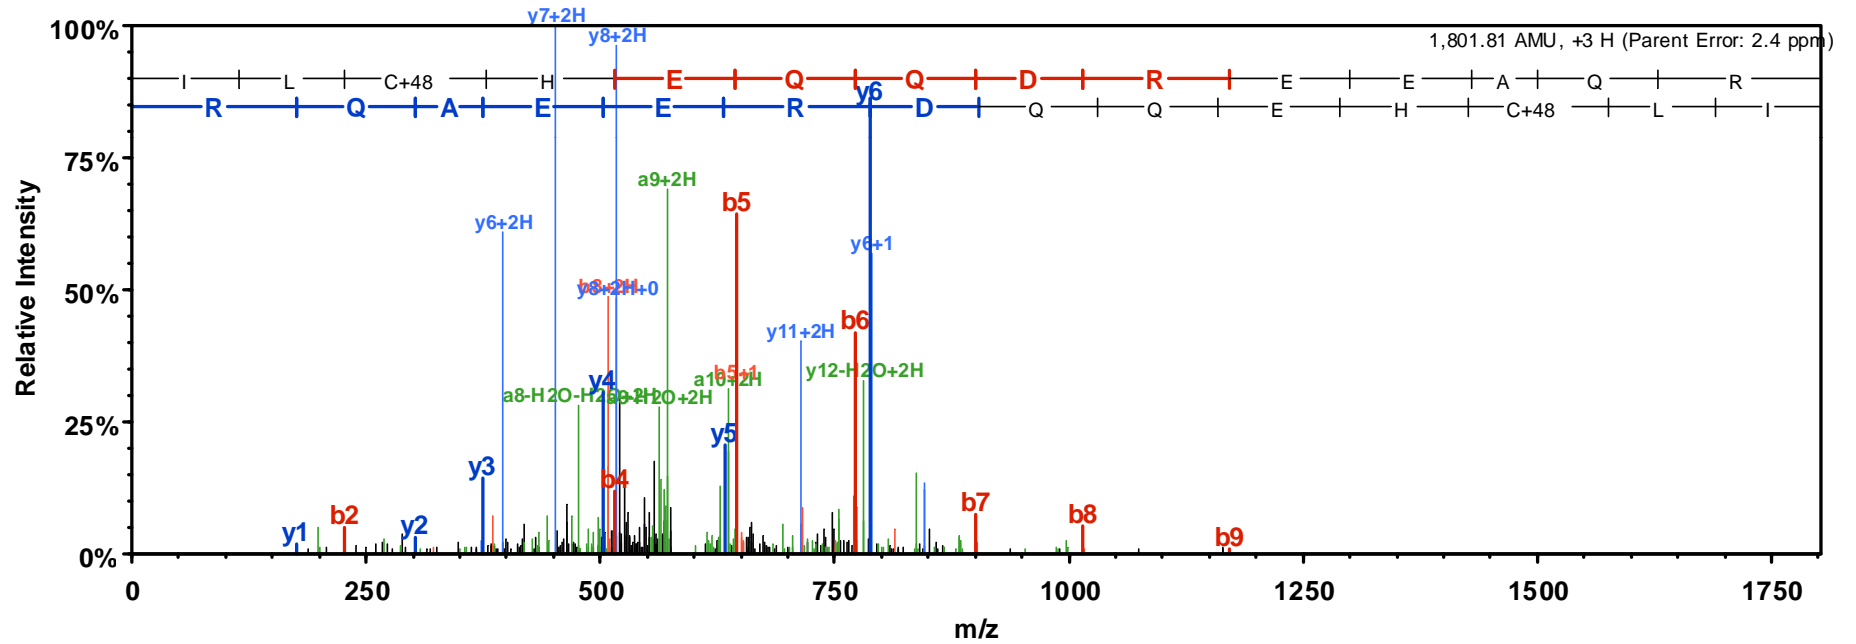

# Serpin B9 ADLSAMSAERDLC310LSKRVHK

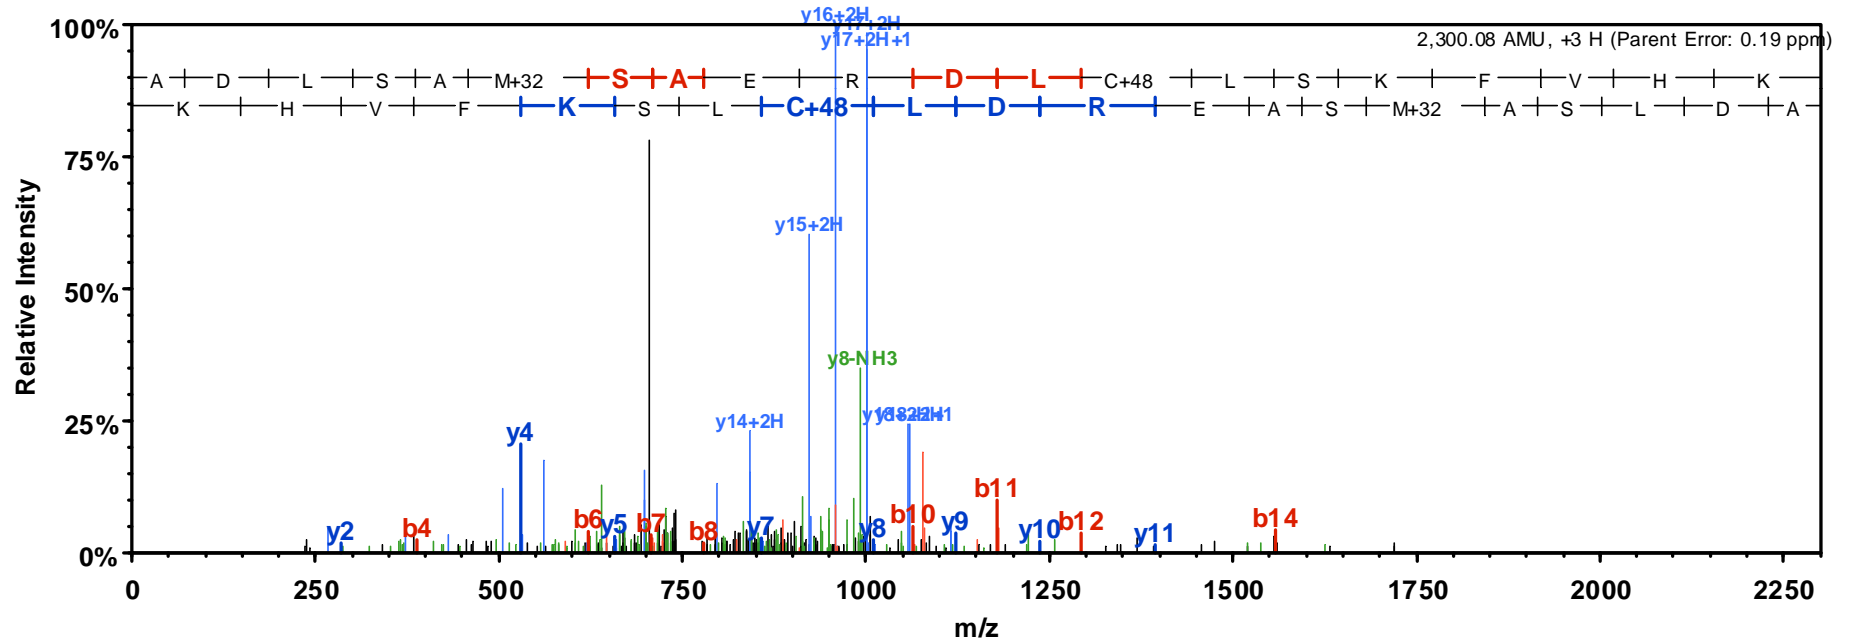

# Serpin B9 FC350ADHPFLFFIR

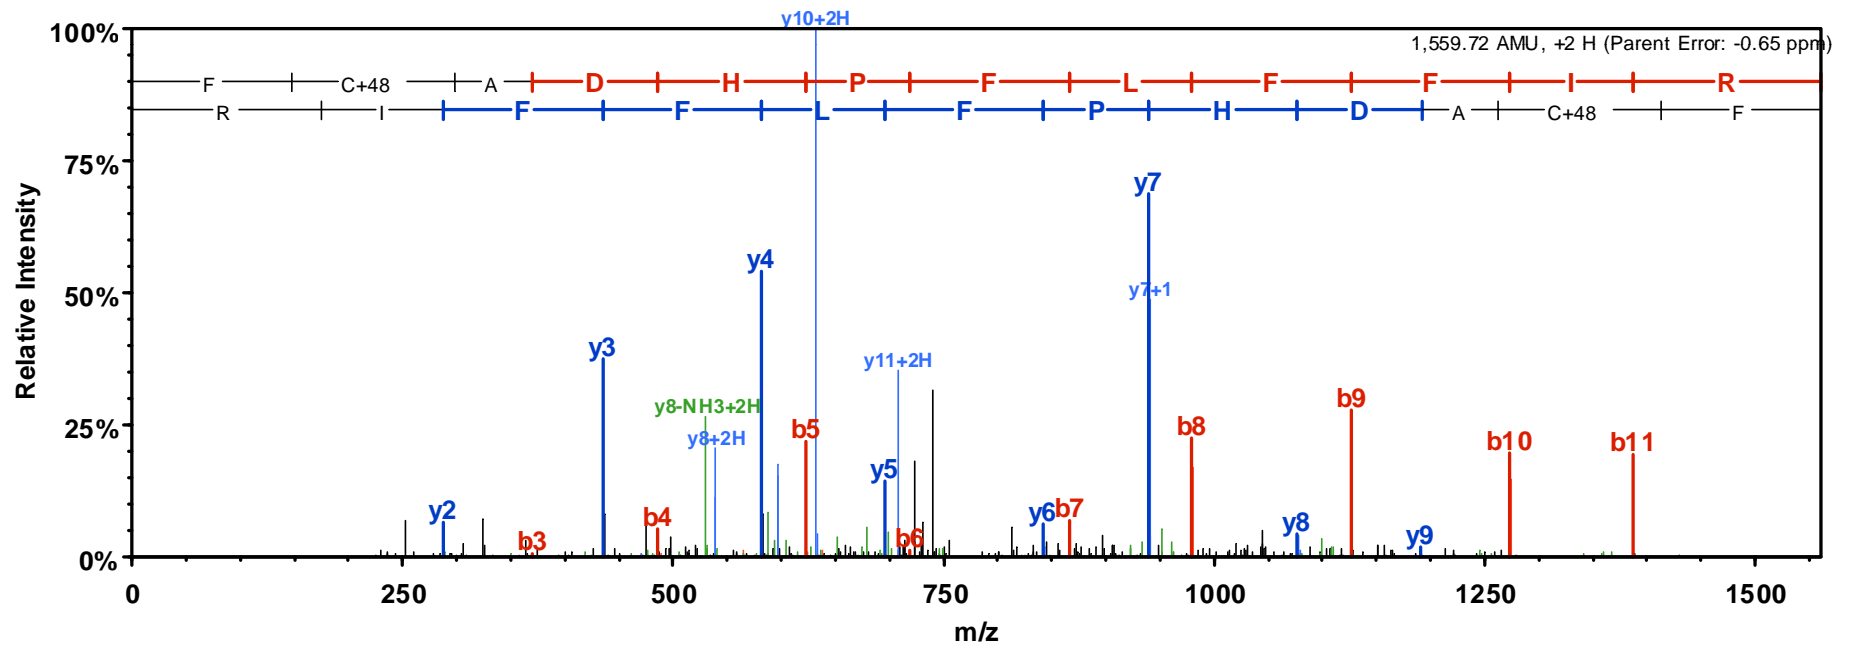

S-formylglutathione hydrolase  
C11FGGLQK

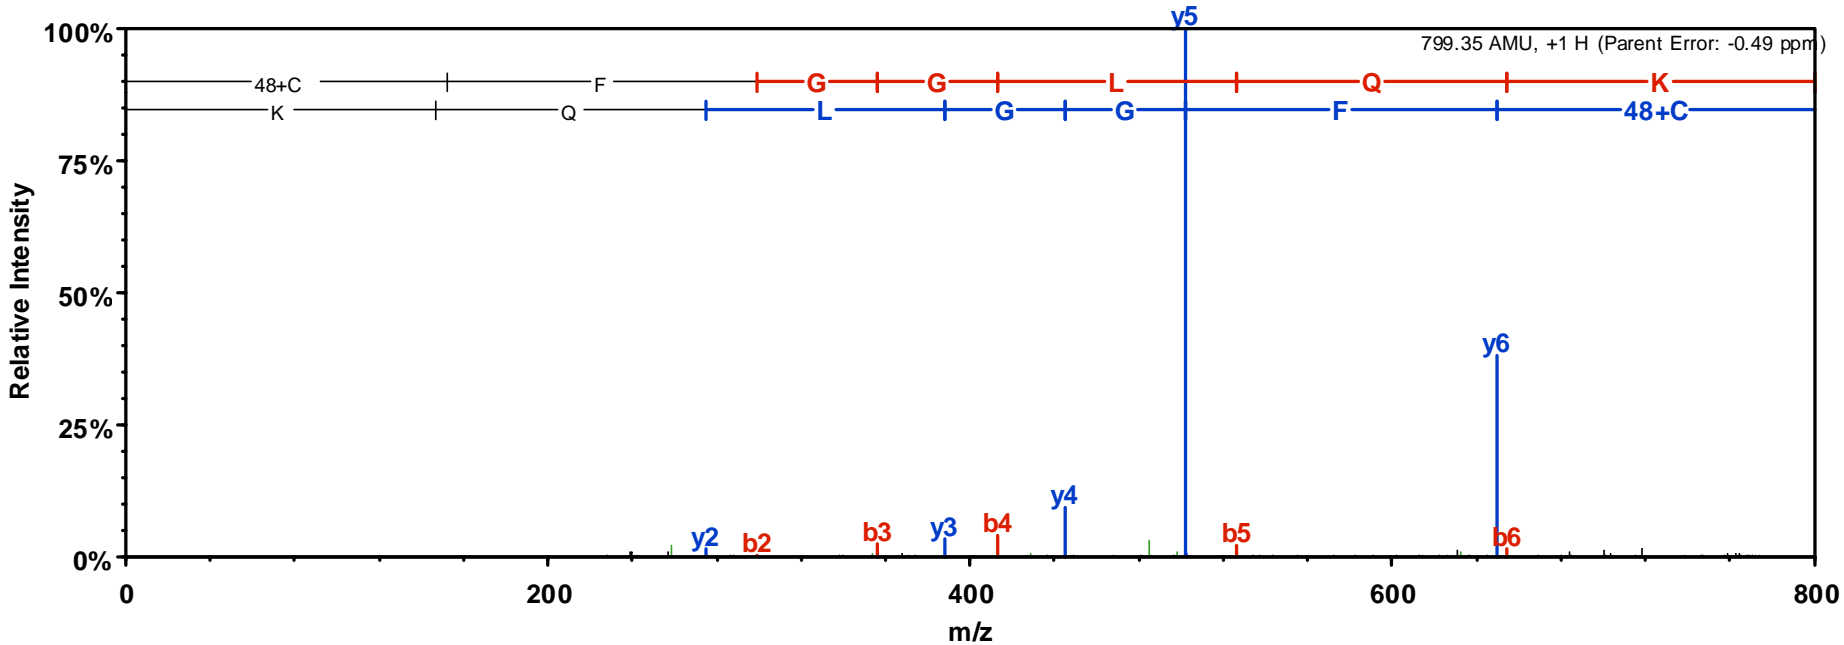

Small muscular protein  
RKEC36TPEVEEGVPPTSDEEK

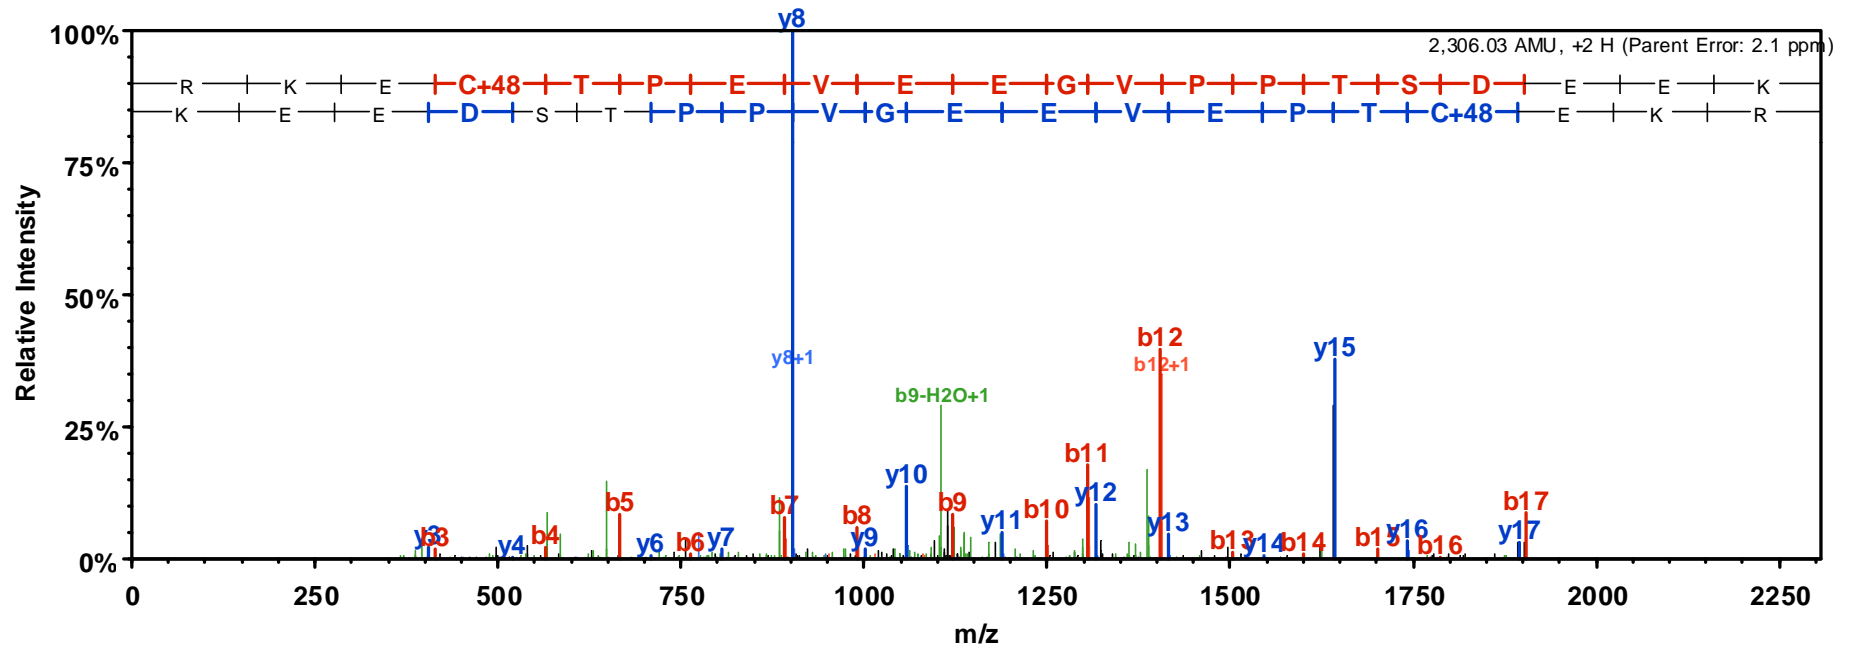

# Snurportin-1 GHPFYDC199QTDFR

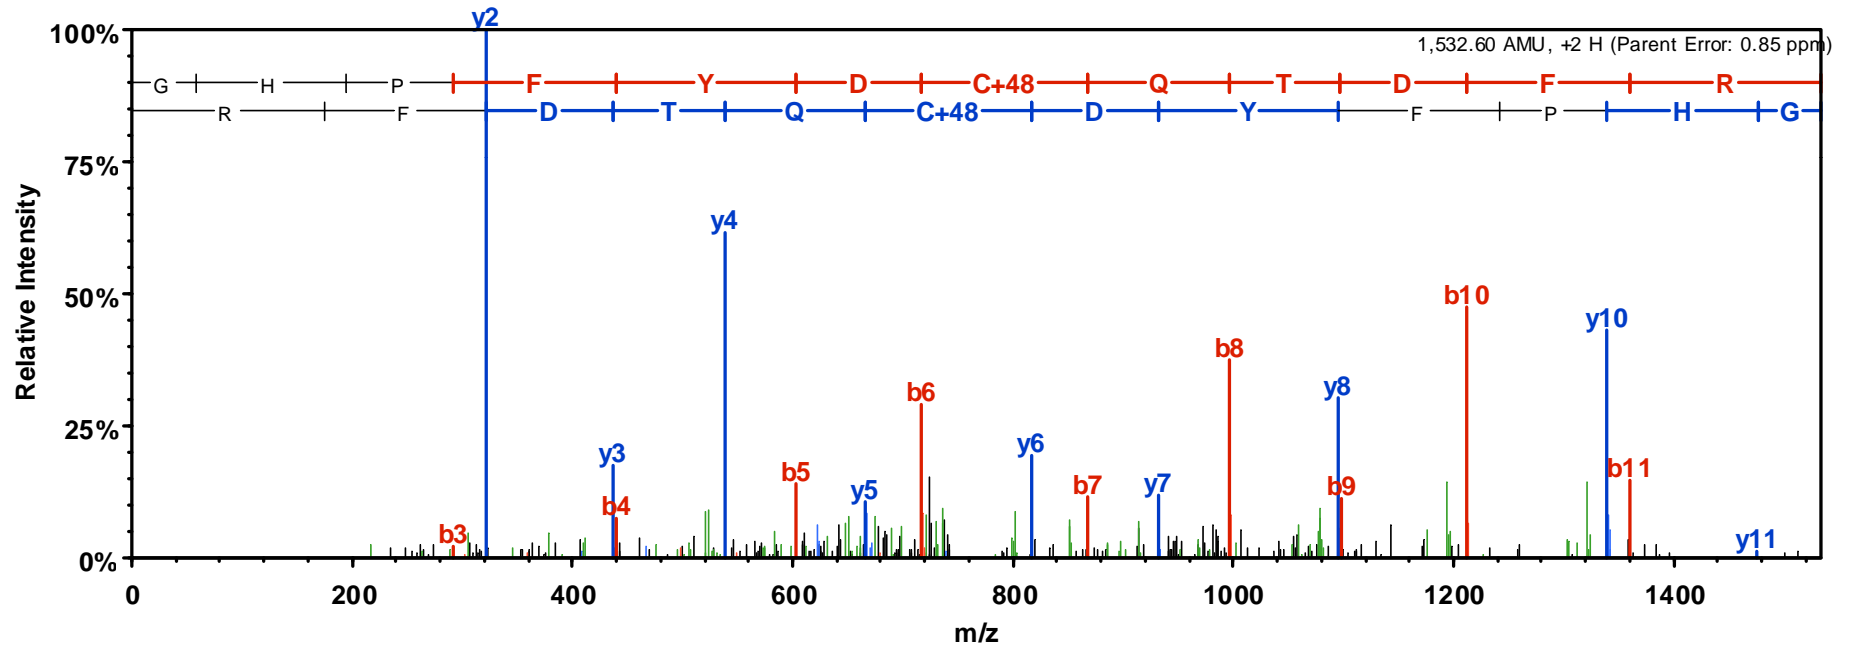



# Snurportin-1

LKGSSHSPDHPGC356LMEN

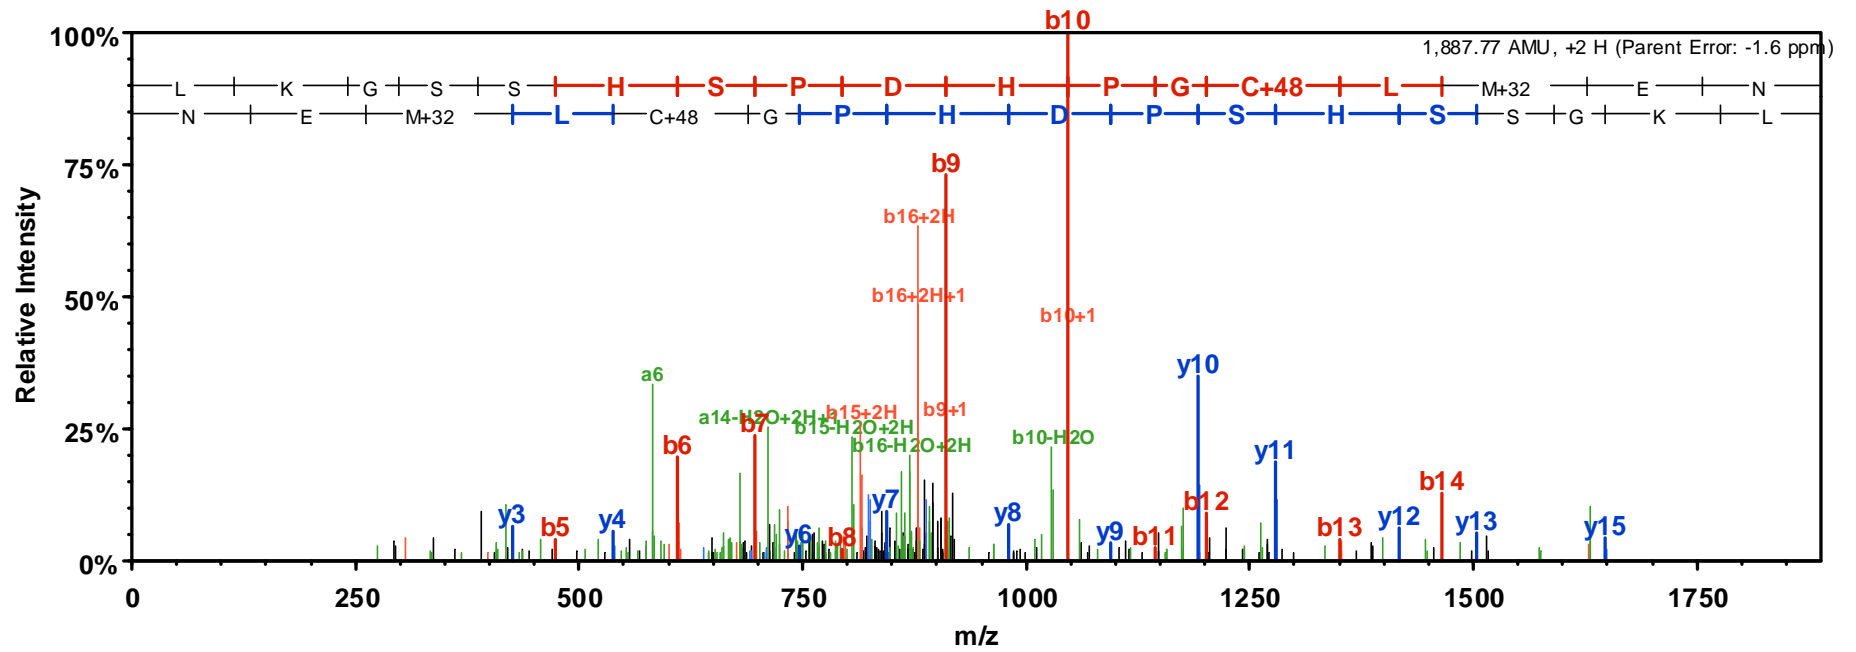

Superoxide dismutase [Cu-Zn]  
AVC7VLKGDGPVQGIINFEQK

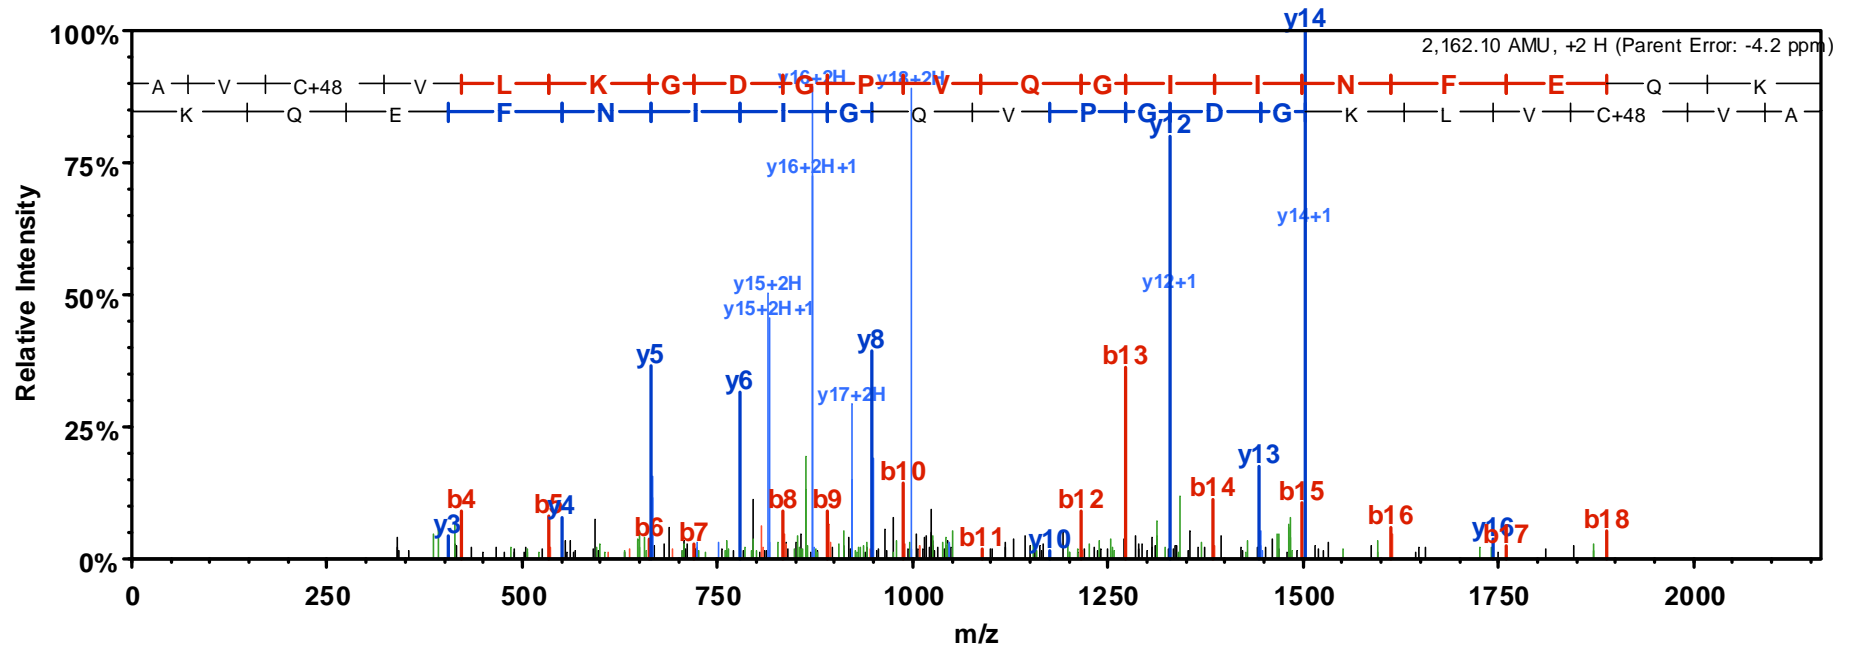

# Suppressor of cytokine signaling 2 C5LEPSGNGGEGTR

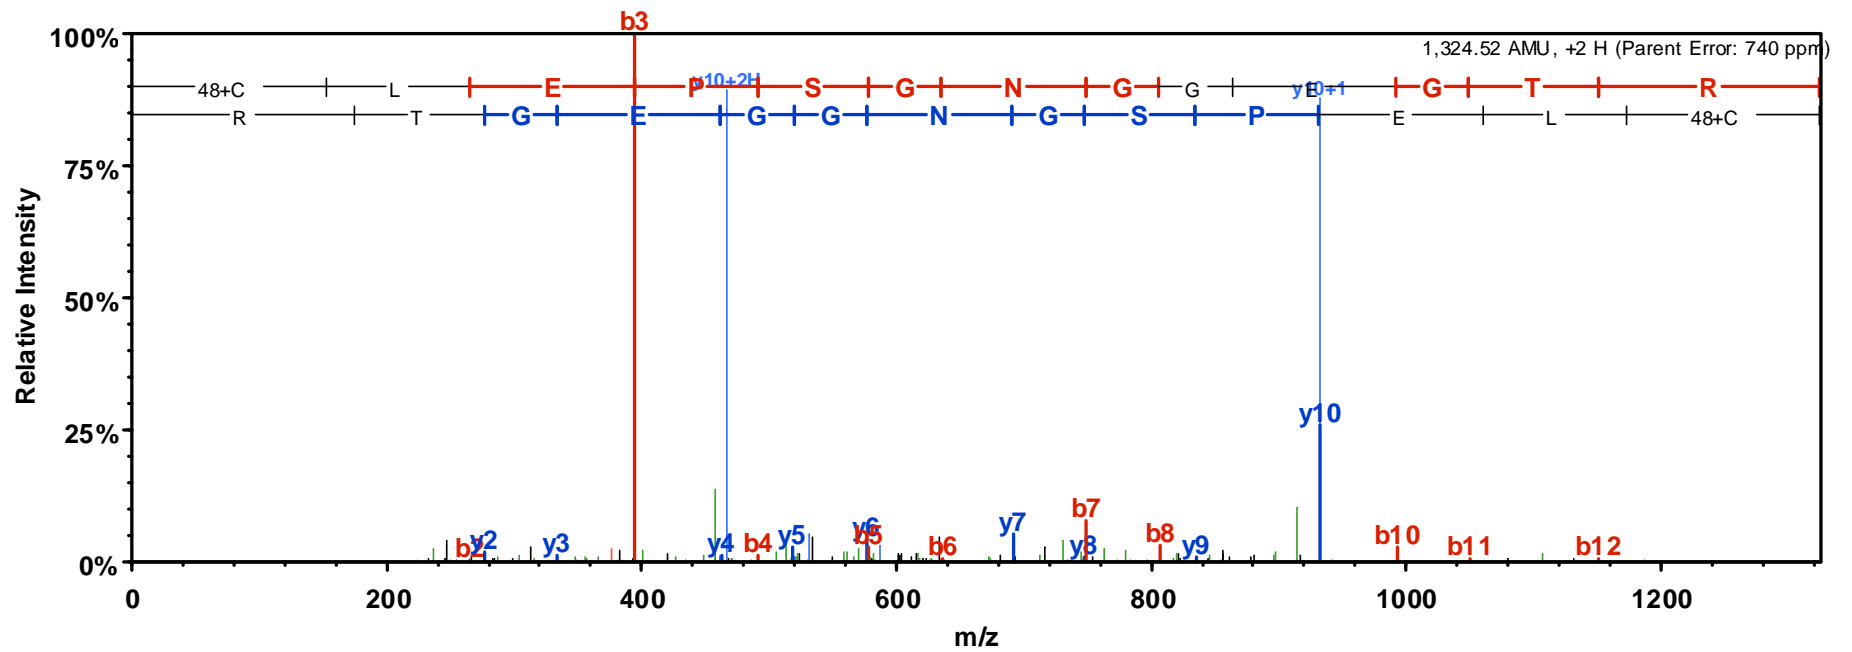

# Suppressor of cytokine signaling 2 NGTVHLYLTKPLYTSAPSLQHLC167R

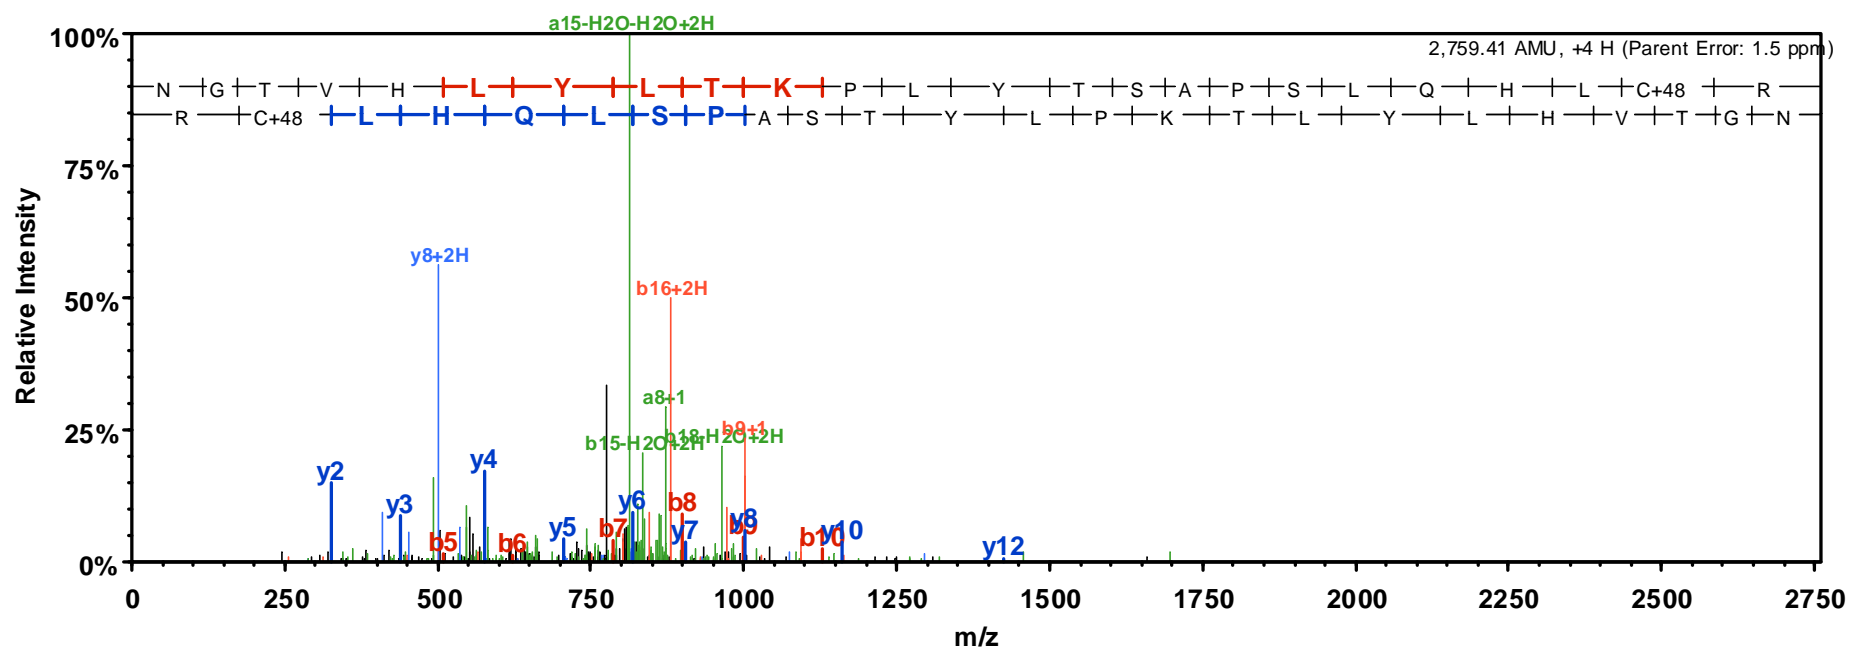

# Telomeric repeat-binding factor 2-interacting protein 1 RLSTLILHGGGTVC54R

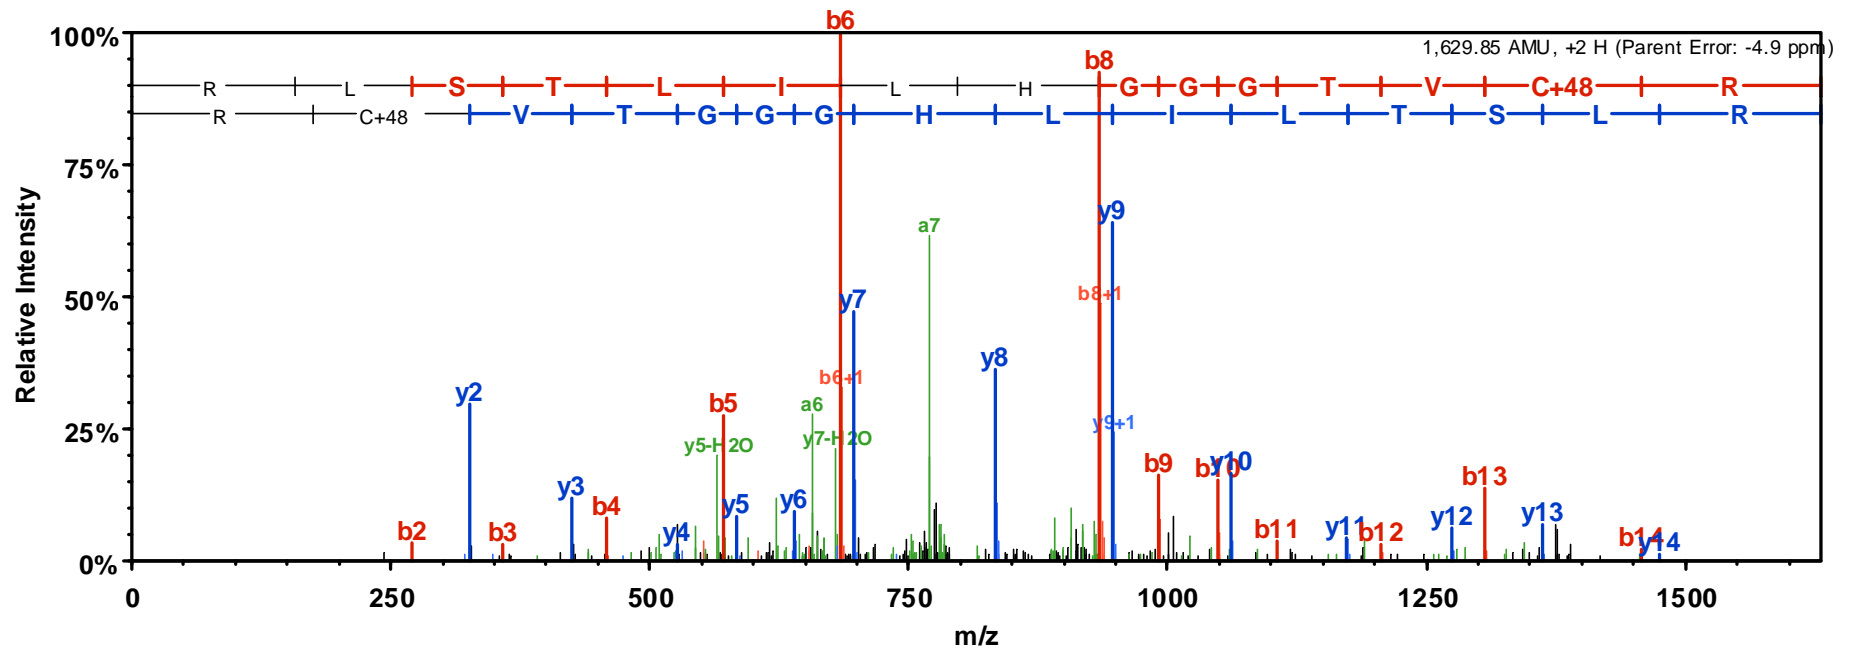

# Desmoglein-1 IHSDC77AANQQVTVYR

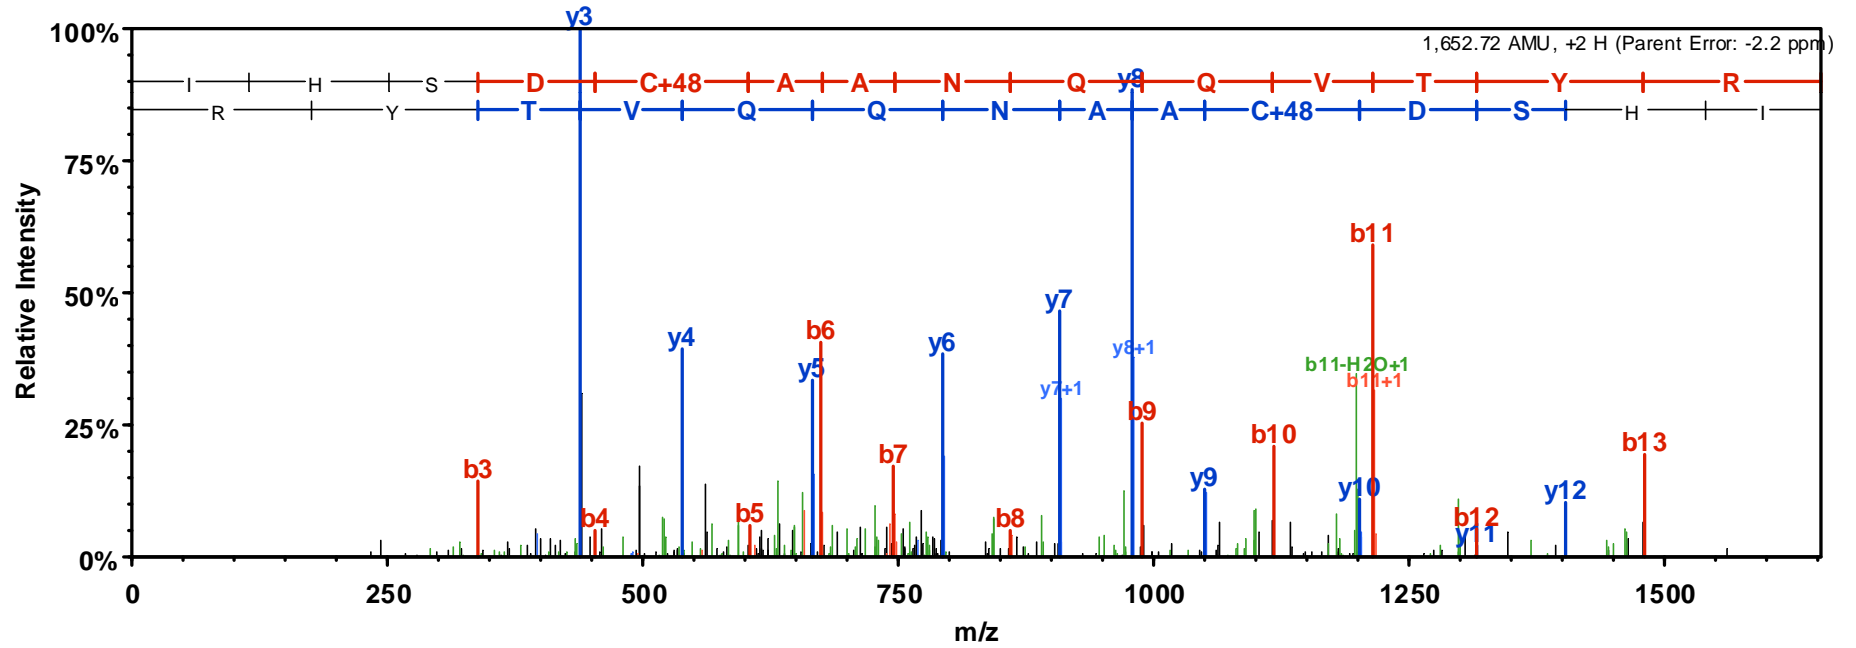

# Thiosulfate sulfurtransferase KVDLSQPLIATC248R

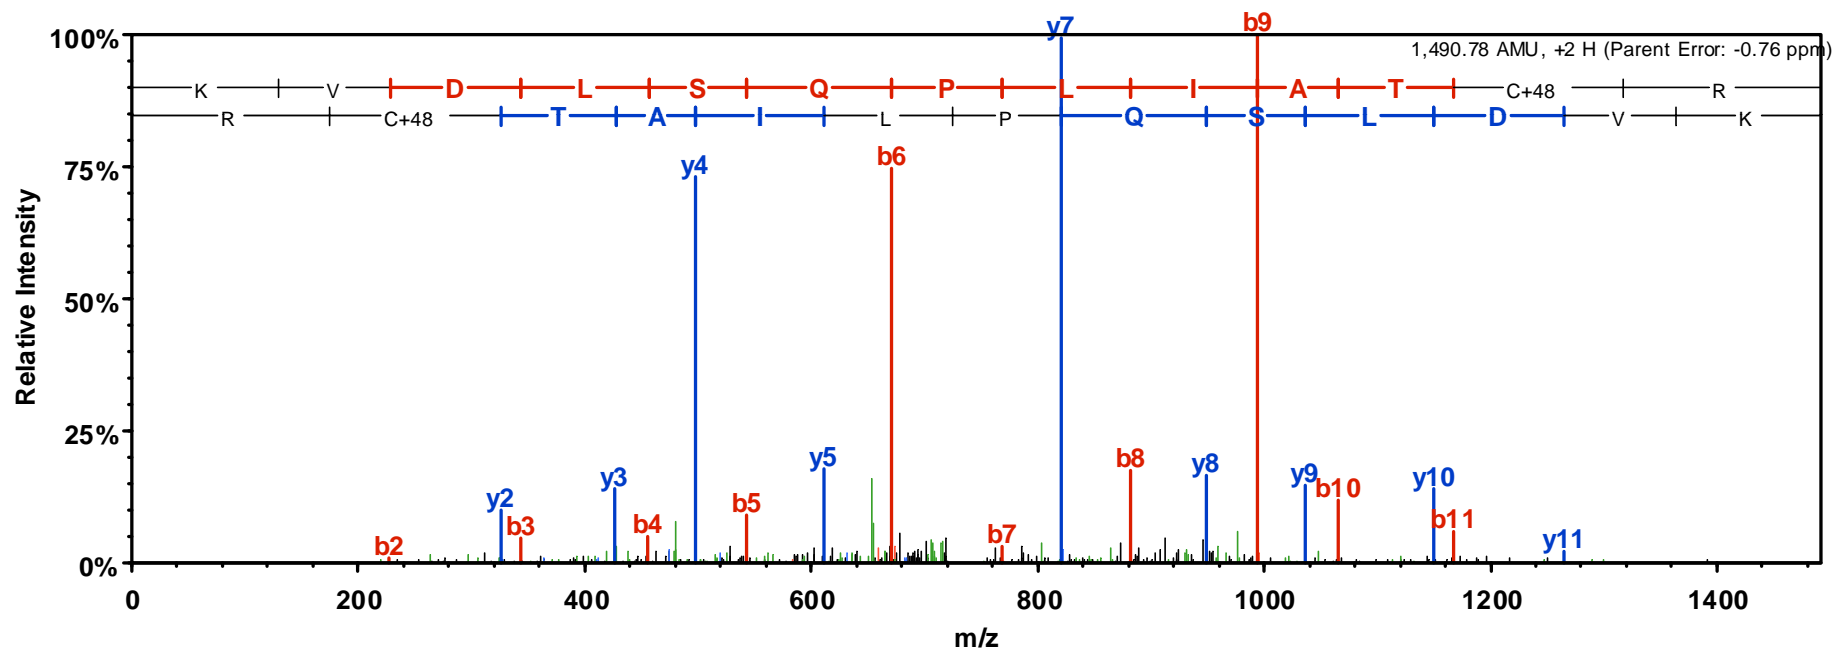

# TNF receptor-associated factor 5 DLKEHLSASC161QFRK

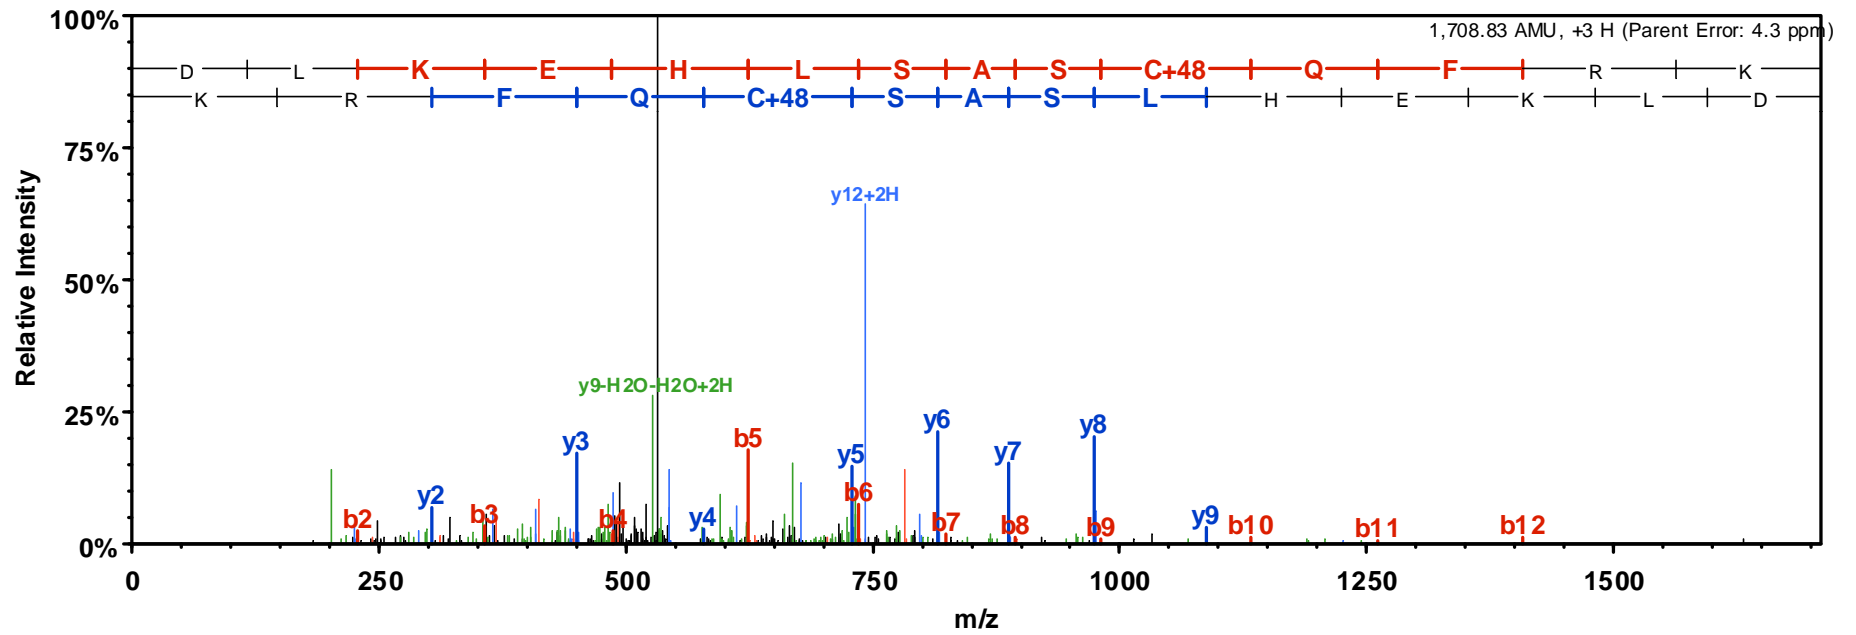



# Tricarboxylate transport protein, mitochondrial YRGIGDC70VR

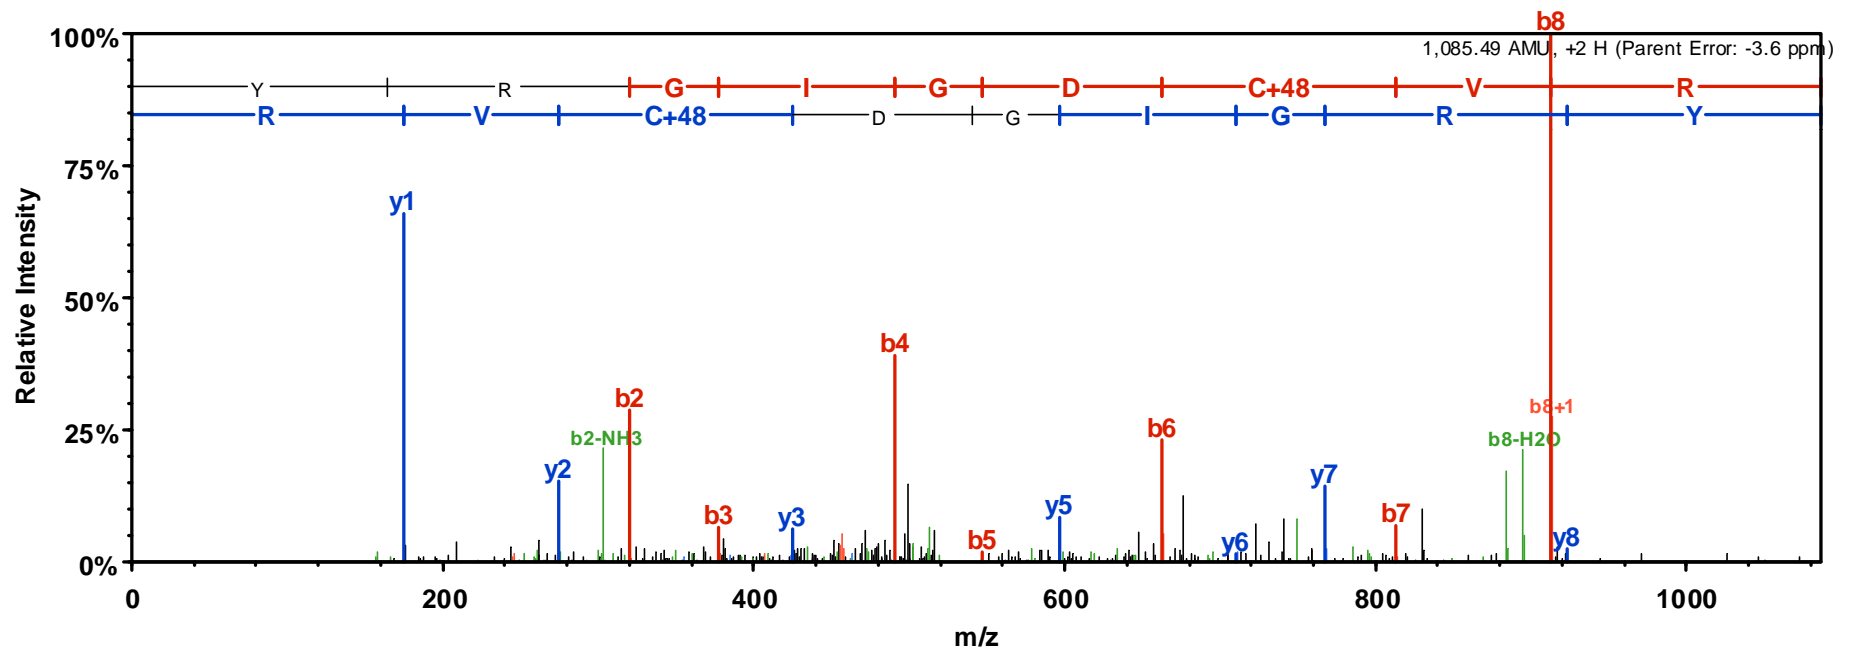

U6 snRNA-associated Sm-like protein LSm4  
MPEC59YIR

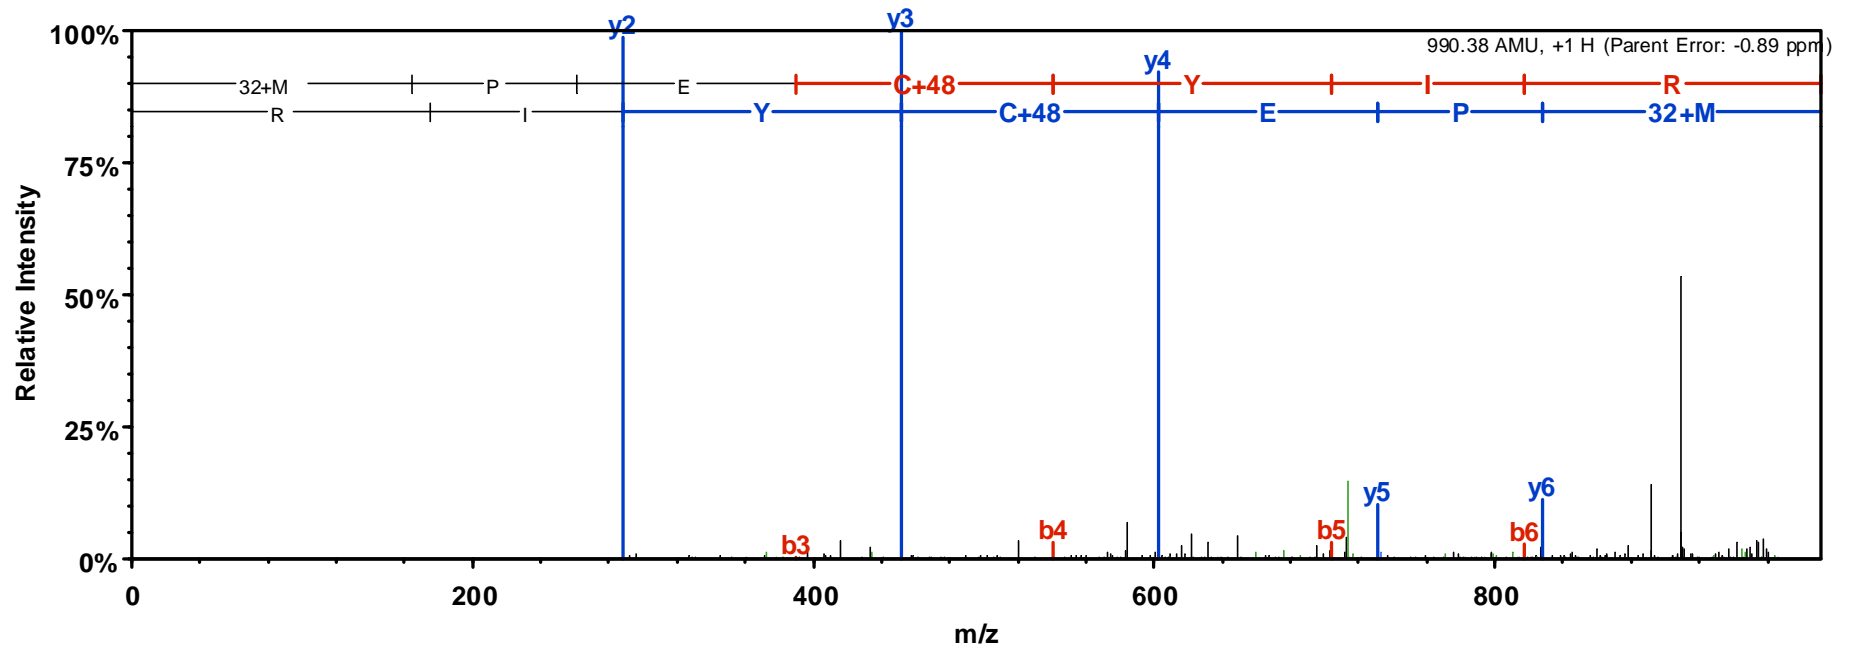

# Uncharacterized protein C20orf135 VIC5FVK

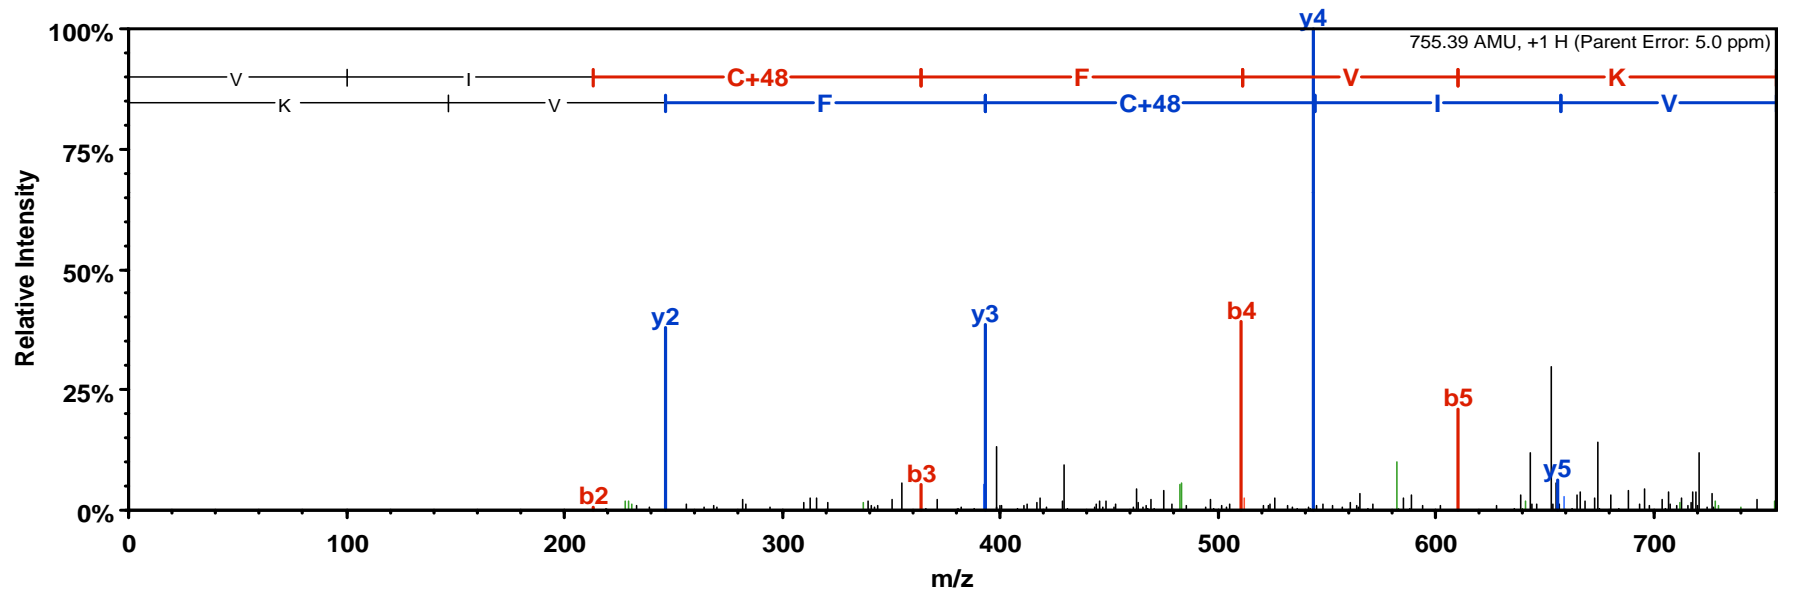

# Vesicle-fusing ATPase GILLYGPPGC264GK

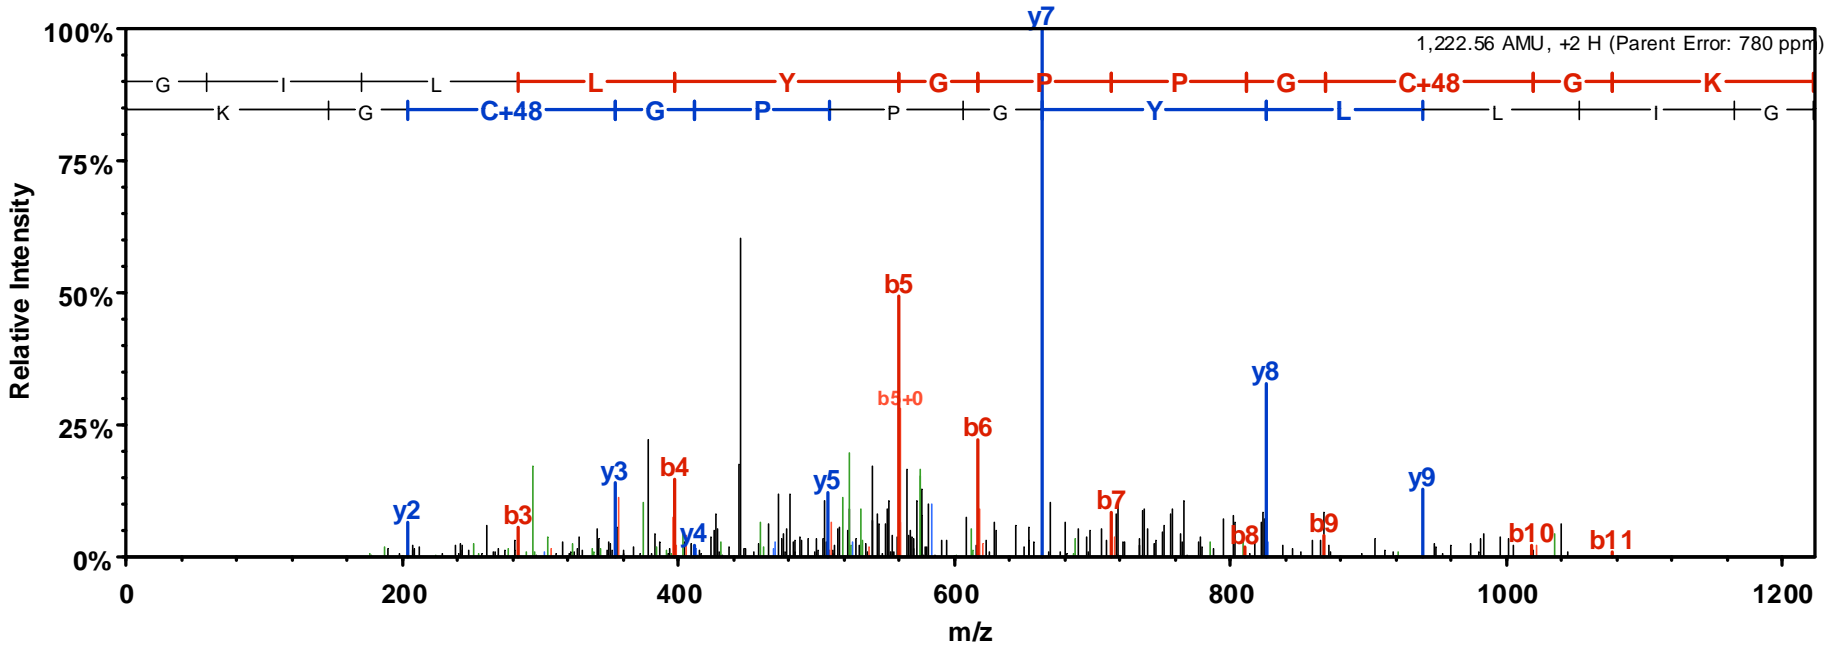

Zinc finger protein 256  
STSC99SLSDHLRVHTSEK

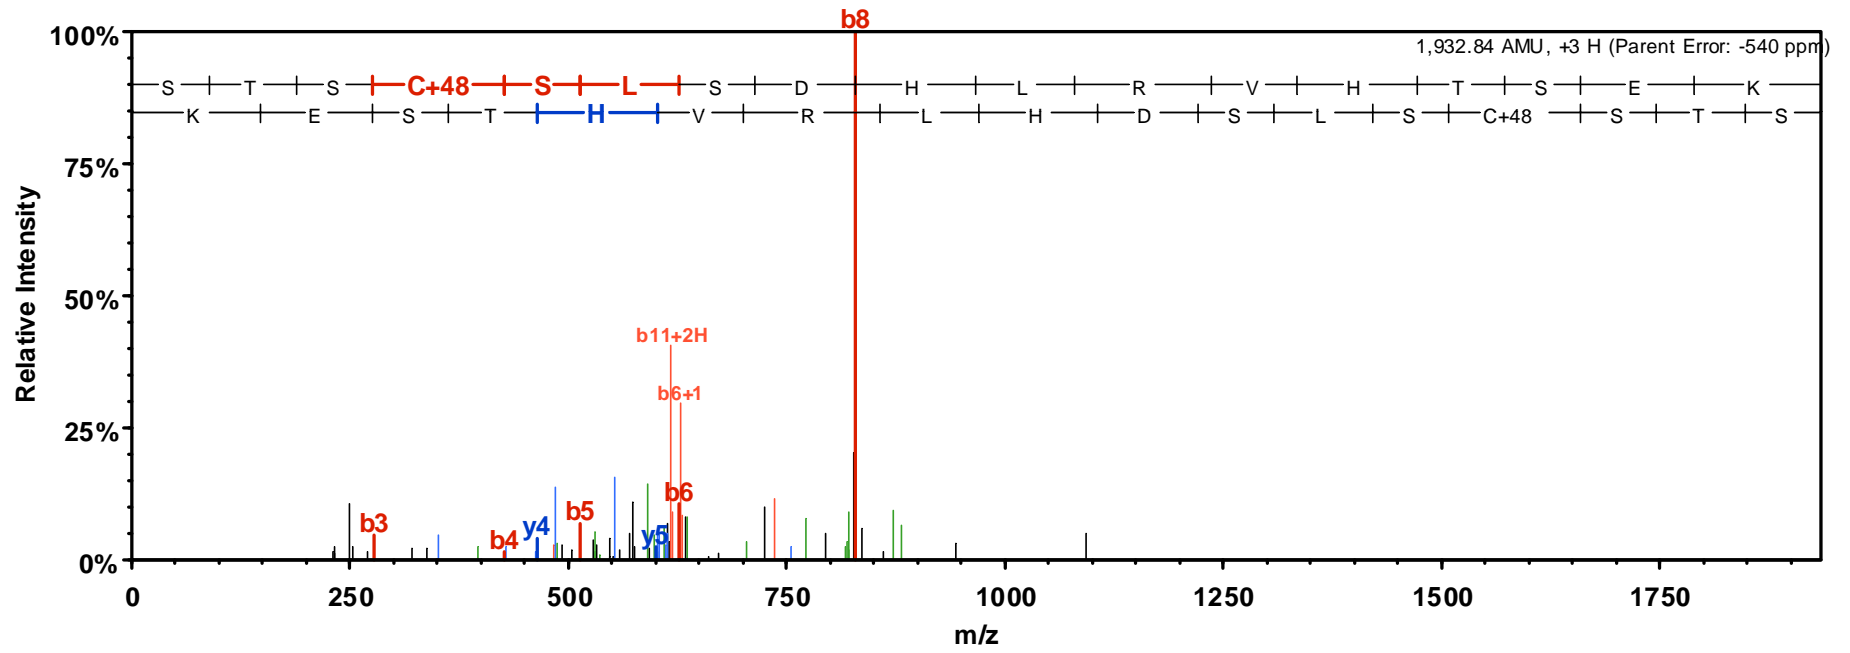

# Zinc finger protein 266 IHVGEKPYECKEC301GIAFTR

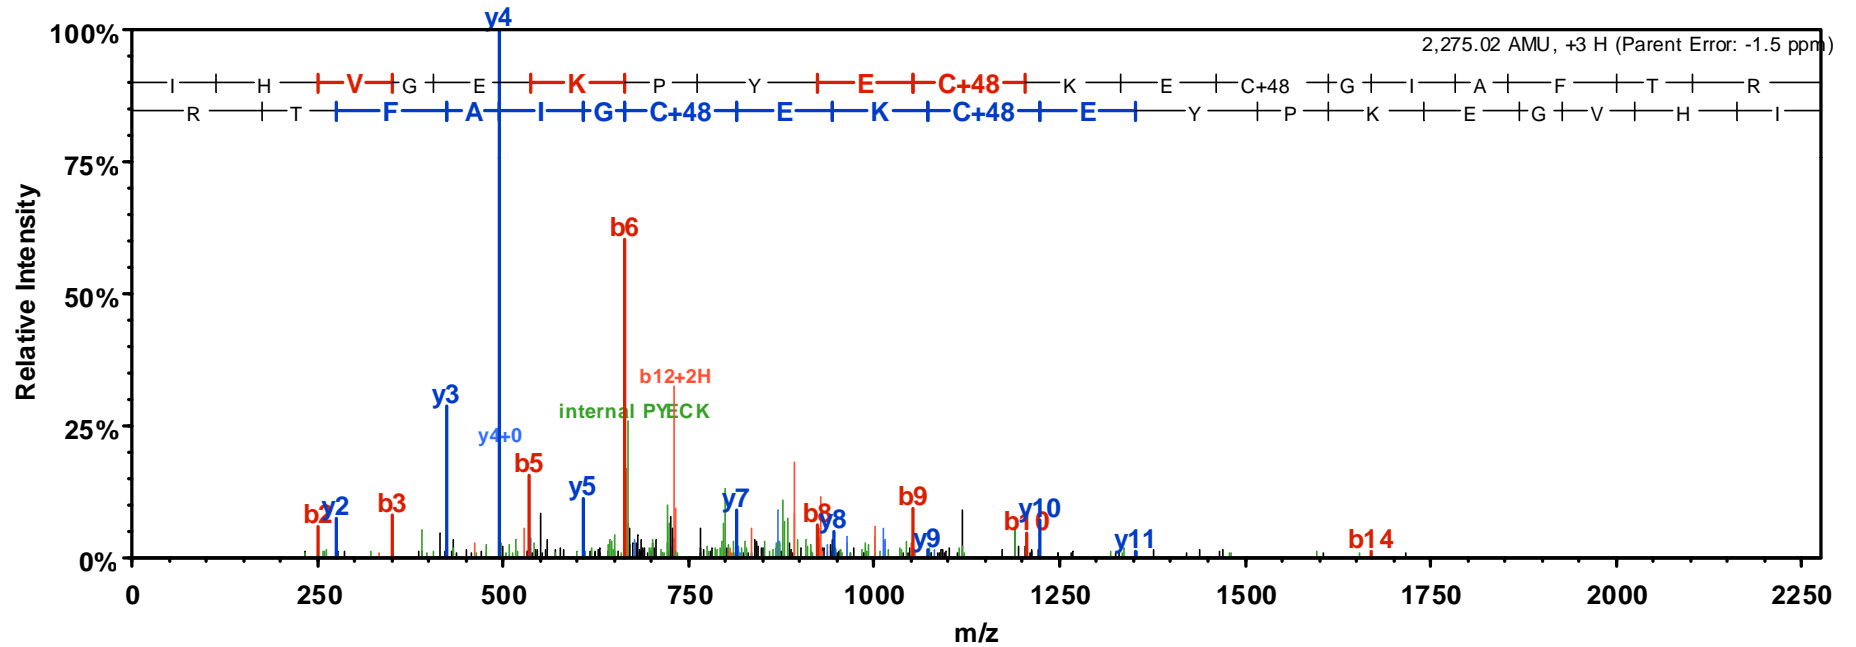

# Zinc finger protein 266 IHVGEKPYECKEC301GIAFTR

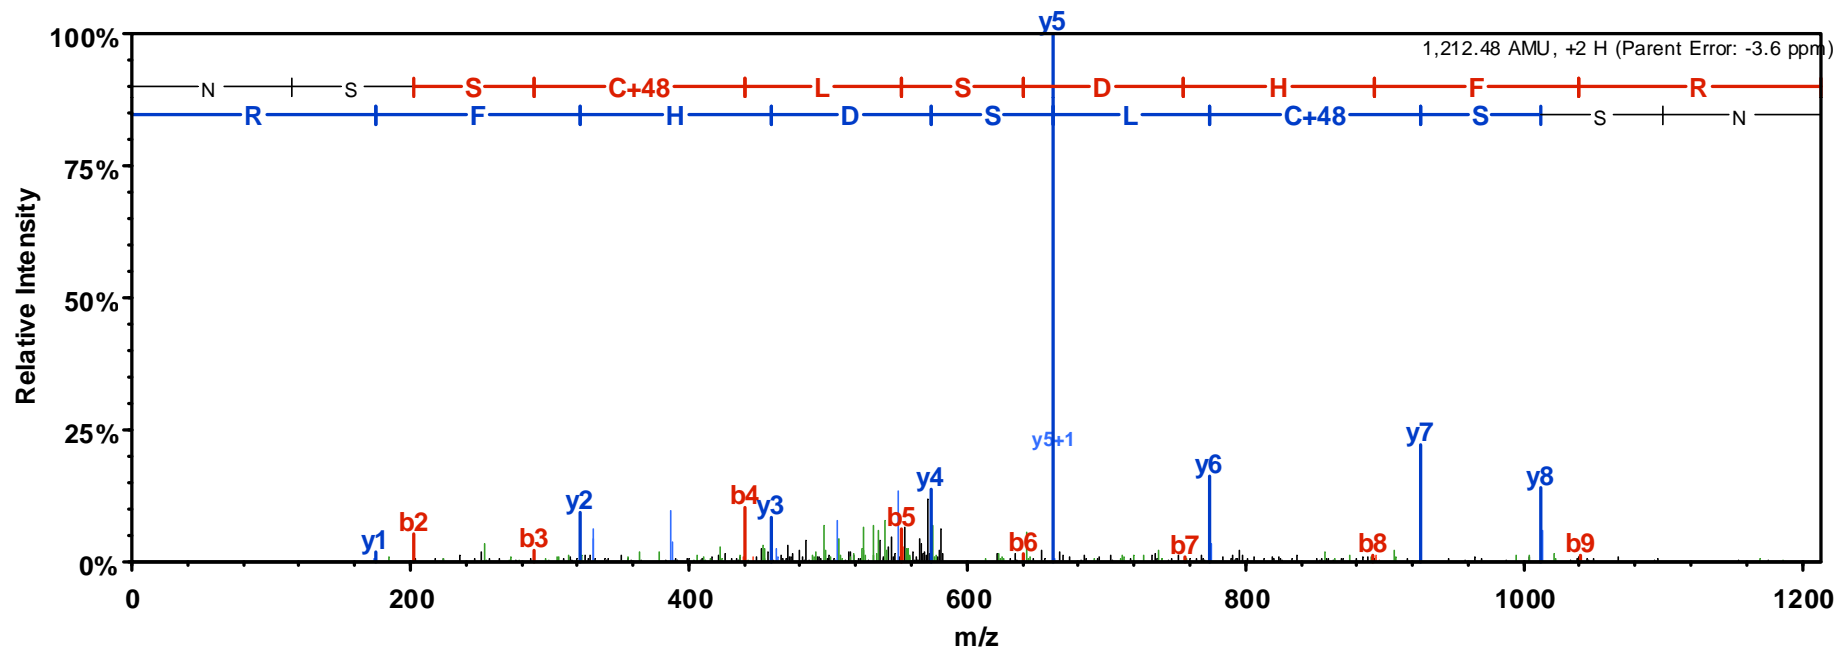

Zinc finger protein 394  
RC292SNLVLC298QHIPK

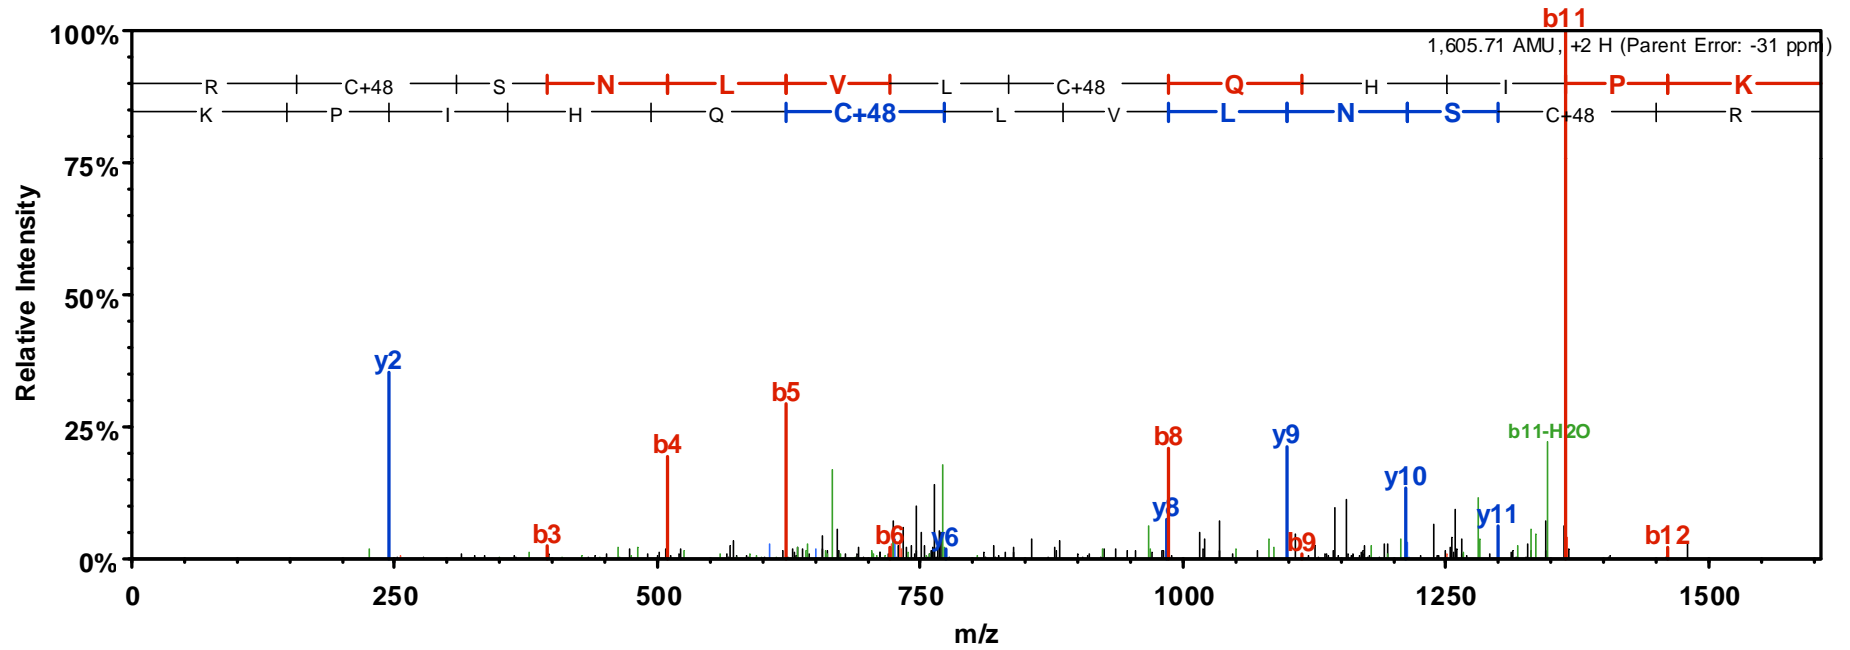



# Protein arginine N-methyltransferase 6 QH YGVD MSC221LEGFATR

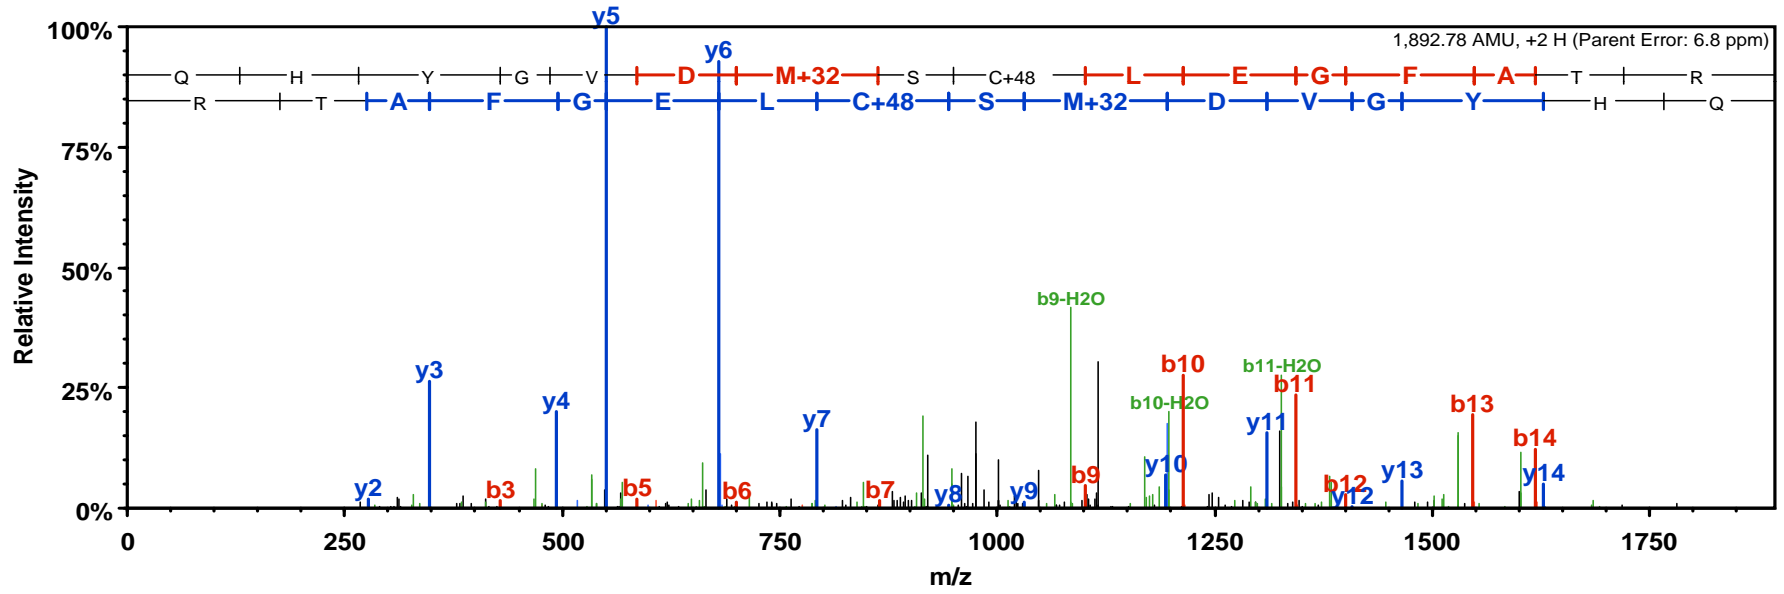

# Protein arginine N-methyltransferase 6 C229LMGHSEIVVQGLSGEDVLARPQR

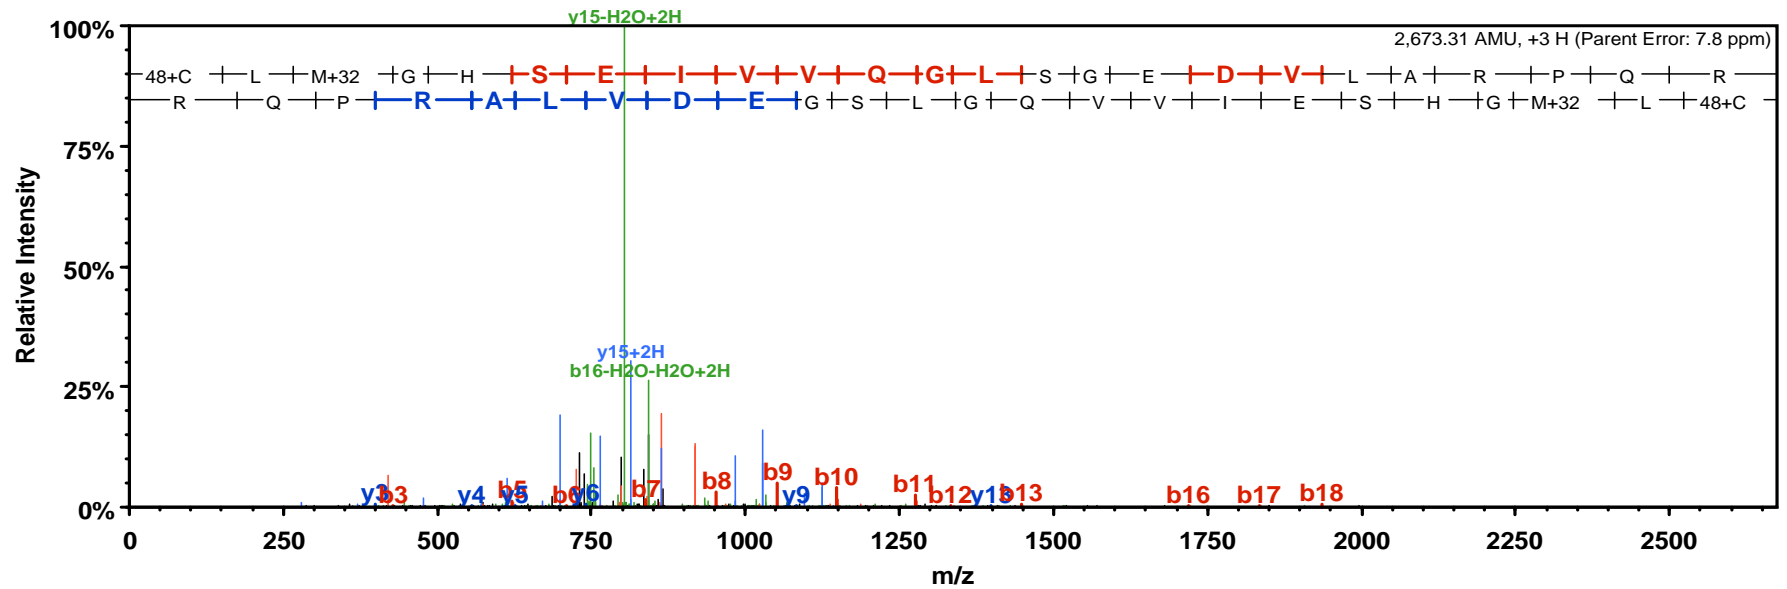

# ES1 protein homolog, mitochondrial VLKEFHQAGKPIGLC176C177IAPVLAALK

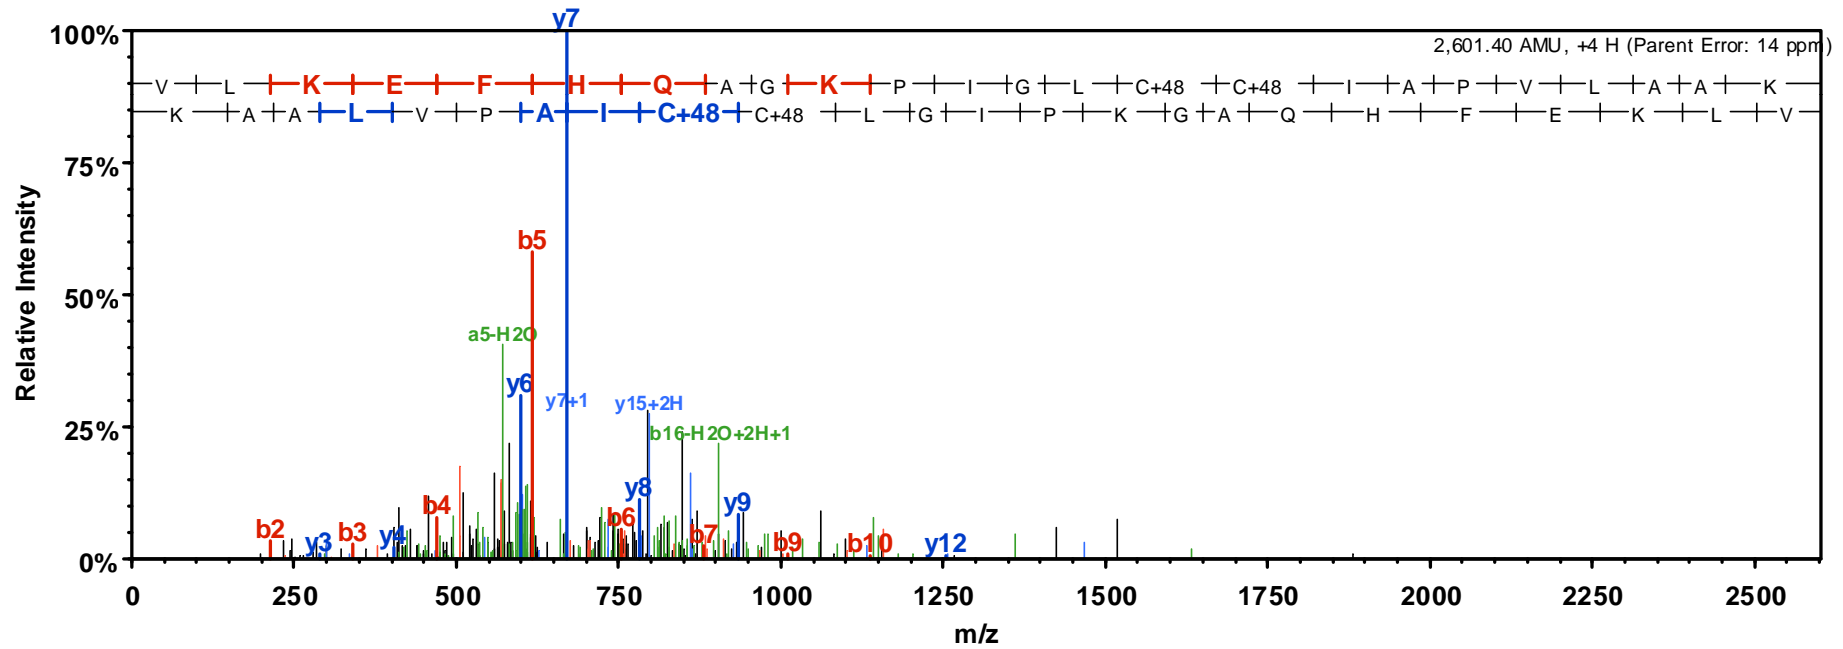

Supplement: supp_M113.032235_mcp.M113.032235-9.pdf [file supp_M113.032235_mcp.M113.032235-9.pdf]
